# Supplementary material for: Direct, Specific and Rapid Detection of Staphylococcal Proteins and Exotoxins Using a Multiplex Antibody Microarray
Source: PLoS One. 2015 Dec 1;10(12):e0143246. doi: 10.1371/journal.pone.0143246 (PMC4666605; doi:10.1371/journal.pone.0143246)
Supplement: S1 File — (XLSX) [file pone.0143246.s001.xlsx]

## Sheet: Protein
substance_name strain ID	160886	124474	196911	196916	199873	199874	199571	199572	199573	199575	199576	199027	200914	200915	200917	200920	200921	200922	200923	200924	200926	200930	124627	215375	215382	215384	94011	124664	119087	94015	189812	91892	94665	124741	132482	225776	225781	223878	94003	94007	94009	138826	138831	145330	150242	223885	215392	215373	124414
Negative control	0.013177	0.0310877	0.028356	0.0405857	0.023148	0.020922	0.010272	0.0348187	0.010215	0.0146033	0.00661933	0.032188	0.0215797	0.0483087	0.0252833	0.011735	0.0182683	0.0120023	0.0146357	0.0195753	0.00908833	0.0264613	0.020126	0.024018	0.15228	0.0043605	0.0168723	0.016648	0.00672367	0.0143877	0.00864533	0.00497333	0.006119	0.00912267	0.024855	0.0335603	0.0120767	0.00718033	0.0109723	0.0127873	0.006914	0.00740167	0.0194757	0.00266867	0.00775333	0.007884	0.005598	0.0543585	0.013566
Anti_PBP2A_1_0.05	0.000624	0.054501	-0.00697667	-0.006547	0.133123	0.137561	0.00269267	0.0039	-0.000304	0.00227367	0.000536	0.00144667	0.154915	0.175808	0.086324	0.227225	0.076839	0.259383	0.315905	0.075793	0.168207	0.17833	0.0101213	0.0137267	0.180633	0.130581	0.00667567	0.239815	0.0177763	0.213478	0.250757	0.0105697	0.0490563	0.0417613	0.00781533	0.124004	0.006914	0.0583247	0.0718233	0.106072	0.00516933	0.068786	0.038087	0.289117	0.106603	0.00777767	0.0101477	0.0278387	0.178862
Anti_PBP2A_1_0.5	0.0172823	0.133553	0.0324955	0.029244	0.619408	0.312453	0.0166673	0.0304563	0.0177617	0.024309	0.00712125	0.0183282	0.785891	0.859003	0.631514	0.732479	0.714724	0.759873	0.856671	0.648838	0.747777	0.812572	0.01674	0.03901	0.822175	0.872228	0.014485	0.880859	0.0179455	0.893683	0.854836	0.0123265	0.68099	0.643923	0.0119418	0.56238	0.0127672	0.0145472	0.694716	0.665931	0.0126585	0.0086985	0.0196905	0.892921	0.375018	0.00855925	0.0439973	0.0294223	0.882748
Anti_ProteinA_1_0.05	0.0504437	0.221558	0.614368	0.282224	0.839892	0.574777	0.61574	0.841128	0.344921	0.46026	0.334733	0.541389	0.632662	0.565003	0.458888	0.660872	0.2936	0.303754	0.179099	0.176146	0.685685	0.540416	0.853568	0.857322	0.22382	0.0383147	0.737557	0.573113	0.538192	0.0108767	0.176655	0.013095	0.308211	0.154292	0.757765	0.764049	0.00722233	0.135223	0.861945	0.124858	0.0932797	0.134138	0.415641	0.820876	0.244026	0.0161073	0.0678807	0.0431683	0.822209
Anti_ProteinA_1_0.5	0.12212	0.402521	0.834809	0.607462	0.841757	0.832725	0.77083	0.84279	0.583879	0.729998	0.687494	0.80667	0.835597	0.843056	0.777817	0.840881	0.4597	0.525318	0.333032	0.42168	0.881532	0.759839	0.849727	0.855669	0.595456	0.115284	0.860739	0.825547	0.830584	0.016708	0.503816	0.0205733	0.578669	0.431335	0.885234	0.886891	0.008025	0.324291	0.869131	0.324261	0.303686	0.413861	0.566478	0.882869	0.686414	0.0135405	0.169767	0.09359	0.820412
Anti_ProteinA_2_0.05	0.057313	0.260202	0.359406	0.149735	0.850825	0.607598	0.712257	0.818384	0.345125	0.439269	0.32367	0.445377	0.592431	0.705398	0.52281	0.6858	0.170275	0.125625	0.209648	0.171031	0.772871	0.360442	0.851027	0.835453	0.241997	0.05313	0.710228	0.575243	0.235087	0.00991533	0.19803	0.0167307	0.372629	0.154851	0.482271	0.788575	0.0577973	0.107453	0.859182	0.137374	0.120948	0.0579547	0.33346	0.844314	0.270498	0.00778233	0.0813527	0.0384247	0.868478
Anti_ProteinA_2_0.5	0.172711	0.242457	0.697884	0.270744	0.846924	0.755732	0.806267	0.857838	0.647653	0.792712	0.680691	0.78388	0.820936	0.832621	0.641729	0.804639	0.587998	0.629346	0.420727	0.448645	0.889649	0.752991	0.850268	0.85746	0.546492	0.113891	0.847469	0.851845	0.7406	0.012152	0.464376	0.00875425	0.689158	0.455189	0.883992	0.887108	0.017607	0.331643	0.871263	0.29838	0.352462	0.194792	0.585526	0.885702	0.69003	0.0189493	0.158432	0.0477385	0.870704
Anti_ProteinA_3_0.05	0.0417067	0.129728	0.047956	0.0291667	0.848069	0.346424	0.425207	0.72521	0.197027	0.274213	0.215156	0.2899	0.31559	0.467349	0.154238	0.393388	0.137252	0.049747	0.043999	0.070462	0.538733	0.292703	0.475262	0.469361	0.128899	0.0308483	0.226159	0.314437	0.0963443	0.010205	0.0811283	0.00762967	0.163836	0.0827677	0.133542	0.45005	0.0208453	0.0493987	0.390217	0.054308	0.0441753	0.0151173	0.0812587	0.460943	0.134782	0.00707367	0.030794	0.0180303	0.66364
Anti_ProteinA_3_0.5	0.0978728	0.346667	0.293608	0.1255	0.853147	0.728573	0.771149	0.862904	0.511386	0.6999	0.584584	0.597925	0.779826	0.835196	0.618724	0.823612	0.472388	0.359781	0.229837	0.190219	0.803334	0.667443	0.854442	0.858012	0.40011	0.094853	0.721012	0.776565	0.257676	0.00922375	0.333313	0.0174285	0.498501	0.332231	0.447399	0.88661	0.00876575	0.199169	0.869329	0.213389	0.216716	0.0407457	0.251563	0.884766	0.463249	0.008638	0.134916	0.0177597	0.869027
Anti_SAK_1_0.05	0.187048	0.181278	0.006163	-0.00162433	0.00487533	-0.00302833	0.406744	0.63475	0.48722	0.303179	0.198663	0.377485	0.527348	0.36141	0.268149	0.29219	0.226482	0.25433	0.028248	0.17335	0.000594667	0.0293767	0.0644403	0.0917137	0.42794	0.00954867	0.666191	0.383114	0.14914	0.0868297	0.218362	0.0119507	0.0388843	0.616518	0.00957933	0.008701	0.0174137	0.512453	0.0682453	0.01347	0.286368	0.0141967	0.00881333	0.0151027	0.00932133	0.0121053	0.185778	0.4441	0.438055
Anti_SAK_1_0.5	0.409033	0.69347	0.045975	0.048336	0.0373547	0.0131423	0.856564	0.846936	0.888353	0.863032	0.888168	0.880748	0.843671	0.855982	0.880554	0.860547	0.851741	0.66792	0.0274133	0.639627	0.0291723	0.0419017	0.0214733	0.0135927	0.890095	0.0358423	0.869386	0.877277	0.081214	0.0123283	0.853801	0.008471	0.140459	0.875394	0.010786	0.02023	0.0276667	0.9153	0.383983	0.0946067	0.852332	0.0124027	0.012041	0.0847617	0.0139463	0.0134433	0.857306	0.86252	0.882307
Anti_HLA_1_0.05	0.093758	0.0121357	0.001316	-0.00101333	-0.00291133	0.0271543	0.007925	0.0144903	0.014054	0.00417567	0.000488333	-0.00240333	0.222402	0.244535	0.121439	0.0231493	0.0470673	0.00492133	0.00475967	0.0249717	0.00110933	0.0133197	0.009963	0.0141163	0.0235627	0.00528367	0.858253	0.197136	0.0161967	0.00577133	0.0472977	0.033719	0.0444863	0.170699	0.0178853	0.008281	0.0131257	0.037064	0.0198237	0.0102227	0.0228807	0.006537	0.006324	0.00583333	0.00791633	0.00871267	0.0138	0.0122953	0.018714
Anti_HLA_1_0.5	0.522177	0.0814783	0.0363637	0.0356713	0.0152253	0.0121593	0.0103963	0.0378447	0.0384383	0.026554	0.0135737	0.0344567	0.75484	0.843481	0.556655	0.0864553	0.243732	0.05702	0.037401	0.049669	0.0252387	0.027412	0.013972	0.0404857	0.0827367	0.0898447	0.855214	0.756355	0.106861	0.021694	0.167847	0.00823633	0.22753	0.562482	0.0147603	0.0169737	0.0202887	0.194352	0.0331747	0.0193777	0.0952247	0.020115	0.0134333	0.014943	0.0109767	0.030483	0.067278	0.00649233	0.00839467
Anti_HLB_1_0.05	-0.000931	0.00973433	0.00594567	0.010571	-0.001951	0.000466	0.0100867	0.007375	0.00764767	0.0127023	-0.000426333	0.00254067	0.0427173	0.0159617	0.002976	0.010165	0.0690963	0.0321313	0.00548033	0.00110333	0.00366167	0.005761	0.0079445	0.006372	0.005282	0.00403367	0.0118903	0.0294107	0.0136037	0.00872967	0.0380957	0.008373	0.0103447	0.007266	0.011085	0.0142873	0.0136587	0.00573933	0.136987	0.0304723	0.008269	0.00725633	0.009216	0.00899667	0.00495933	0.011408	0.048825	0.013126	0.00597833
Anti_HLB_1_0.48	0.049727	0.0619157	0.182475	0.156916	0.052083	0.0604933	0.064164	0.0780047	0.10473	0.0613967	0.0369963	0.17848	0.0791147	0.068163	0.0512305	0.0628145	0.0308837	0.0702817	0.0476795	0.0566053	0.037467	0.0824557	0.0659843	0.091407	0.0144657	0.0149897	0.015217	0.017538	0.0371233	0.0177373	0.0362853	0.01428	0.0317237	0.01672	0.152327	0.115719	0.0133267	0.007779	0.025592	0.00719367	0.00886	0.084748	0.0667025	0.0232527	0.052754	0.018448	0.0115677	0.030632	0.0371203
Anti_HLB_2_0.05	0.000160667	0.006891	0.00150767	0.004453	0.003241	0.00216833	0.0102257	0.0124233	0.004492	0.00452567	0.0100507	-0.00154267	0.0663907	0.020376	0.0203895	0.035484	0.00544767	0.00654267	0.0383503	0.0119793	0.013248	0.002077	0.0508657	0.076141	0.0108283	0.00681967	0.013653	0.0593893	0.025864	0.00739033	0.0210923	0.0102463	0.013195	0.00512767	0.007327	0.012451	0.008439	0.00513833	0.0466343	0.020393	0.00699267	0.00528067	0.016087	0.011207	0.008177	0.0292627	0.00891767	0.006539	0.0153657
Anti_HLB_2_0.48	0.0388117	0.036903	0.0876377	0.0778057	0.0493123	0.043813	0.0251713	0.0564373	0.0382293	0.042647	0.018925	0.0388137	0.0463097	0.061388	0.0075	0.0992363	0.0415427	0.0409587	0.066233	0.0511647	0.0266713	0.0465907	0.0258877	0.0958417	0.00827967	0.011899	0.00964533	0.0203833	0.030546	0.0203333	0.020587	0.020794	0.0289553	0.017392	0.0415337	0.0299973	0.01483	0.00824533	0.022441	0.017147	0.044176	0.0152827	0.013341	0.026255	0.0226843	0.0110067	0.0127845	0.010184	0.0266033
Anti_HLB_3_0.05	-0.000815333	0.00525933	0.009359	0.0115567	0.000284333	0.00305833	0.00443267	0.0196463	0.000574667	0.000447667	0.00442	-8.96667e-05	0.015071	0.009974	0.012688	0.019325	0.0246303	0.0124743	0.004522	0.0140167	0.015463	0.00548633	0.0151133	0.0180983	0.009726	0.0173247	0.0167223	0.0168097	0.013949	0.00565333	0.00995933	0.008502	0.0147223	0.0282293	0.00906733	0.037532	0.0121023	0.0128597	0.013432	0.0343647	0.00827933	0.00895333	0.007833	0.0173037	0.0110187	0.008053	0.00297	0.007407	0.00777133
Anti_HLB_3_0.48	0.038138	0.0111903	0.1047	0.0735013	0.064517	0.050542	0.0210343	0.0346683	0.0203917	0.0266143	0.0124107	0.030587	0.0744173	0.054665	0.033274	0.073177	0.01126	0.0470487	0.0285763	0.009462	0.0109273	0.011704	0.05016	0.042193	0.014053	0.008877	0.016362	0.0162557	0.0270547	0.0138523	0.102168	0.0155537	0.0288807	0.014038	0.0312203	0.037497	0.012351	0.012156	0.0141365	0.0056755	0.0180003	0.0244883	0.0222897	0.0148383	0.0121343	0.0517003	0.011725	0.0164877	0.0267583
Anti_HLB_4_0.05	0.00318167	0.006249	0.001542	-0.00617833	0.000343333	-0.000318667	0.0169743	0.0347087	0.000602667	0.00641567	0.000631333	-0.000375	0.0130313	0.0075275	0.000501	0.034004	0.0615963	0.005892	0.070417	0.004418	0.0100747	0.00958433	0.0299333	0.00861733	0.003832	0.0435533	0.015774	0.0105913	0.00549067	0.010904	0.010411	0.008085	0.015287	0.00695267	0.001421	0.00907933	0.00466667	0.00828867	0.0116033	0.01311	0.0152917	0.00467433	0.110909	0.00786633	0.01816	0.00764733	0.011693	0.0106427	0.0139323
Anti_HLB_4_0.5	0.0143693	0.0210637	0.088287	0.084616	0.0261077	0.0573027	0.0303067	0.0387207	0.0250613	0.037428	0.0148297	0.0490823	0.0389793	0.0307853	0.038091	0.0532603	0.043398	0.0554617	0.0338683	0.046331	0.043782	0.0667387	0.027542	0.021123	0.005241	0.00637767	0.0175903	0.018227	0.0243223	0.0105193	0.013702	0.0120263	0.01694	0.0154333	0.0305623	0.0470947	0.007234	0.00858133	0.0208473	0.0170917	0.042646	0.0209727	0.015865	0.0193047	0.0170907	0.010887	0.0117277	0.00876167	0.0100823
Anti_HLB_5_0.05	0.011063	0.0139847	0.18541	0.135586	0.0144453	0.0204323	0.00404233	0.00799633	0.001723	0.00428833	0.00111967	0.00462033	0.0260113	0.0131827	0.00376267	0.0125547	0.00270733	0.019648	0.0374363	0.00632367	0.00172867	0.003088	0.324578	0.339663	0.0219853	0.066399	0.0125337	0.00825867	0.298897	0.00649933	0.06793	0.01088	0.0128823	0.00909067	0.496926	0.403262	0.009027	0.0111127	0.0137483	0.00625333	0.0109557	0.284452	0.292899	0.0107627	0.0162993	0.012285	0.00962533	0.131658	0.185626
Anti_HLB_5_0.5	0.0114227	0.0455853	0.663907	0.613603	0.108072	0.156682	0.032128	0.036326	0.033139	0.0409303	0.0176877	0.044638	0.0720567	0.0235797	0.0866563	0.03714	0.0217723	0.0959903	0.27113	0.0221427	0.0368163	0.040775	0.859874	0.861114	0.00722367	0.049506	0.0242077	0.011587	0.906419	0.010724	0.086199	0.0113033	0.0507273	0.0171043	0.879321	0.859971	0.00975267	0.005791	0.0179343	0.00771433	0.0131247	0.841752	0.859835	0.0115123	0.0259857	0.0224617	0.006491	0.454767	0.769141
Anti_SEA_1_0.05	0.595566	0.0221767	-4.8e-05	5.73333e-05	-0.001527	0.00139067	0.0482007	0.851382	0.812794	0.0467153	0.000412333	0.00203867	0.00824167	0.0282653	0.0125373	0.0294583	0.057885	0.00668967	0.00812967	0.0345403	0.024986	0.0189437	0.0561383	0.0588587	0.003876	0.0413133	0.0166433	0.217641	0.006943	0.00628	0.0278883	0.0283187	0.00724	0.008745	0.0116357	0.153173	0.007845	0.0658157	0.857936	0.0138537	0.419744	0.006702	0.010881	0.0306047	0.00865267	0.0161963	0.00521467	0.0190953	0.0110283
Anti_SEA_1_0.5	0.856037	0.0285585	0.045106	0.11629	0.0494675	0.029642	0.507862	0.849919	0.888431	0.620684	0.0365505	0.049812	0.0316522	0.0857863	0.0326817	0.0118213	0.455018	0.0318448	0.0195595	0.0324607	0.504089	0.406226	0.420625	0.0299293	0.0134737	0.018343	0.0229783	0.876069	0.0177628	0.0268812	0.0145455	0.0209812	0.0160467	0.015442	0.0227037	0.0290962	0.018623	0.721769	0.867143	0.203265	0.875972	0.0127493	0.0180823	0.332732	0.016861	0.018936	0.0136088	0.197183	0.0765432
Anti_SEA_2_0.05	0.00160033	0.00684367	0.000757	0.012686	-0.00114267	0.000975333	0.00561467	0.003013	0.00224267	0.000586667	0.003005	-0.00223667	0.0409377	0.00536433	0.011467	0.0389717	0.00394333	0.005614	0.0148183	0.00634133	0.010487	0.013094	0.0119853	0.0177257	0.006828	0.00319567	0.008828	0.0179653	0.0077315	0.0232953	0.009332	0.00797967	0.062542	0.007764	0.008181	0.008909	0.00250933	0.007596	0.00596133	0.009143	0.0176327	0.013989	0.026926	0.00578267	0.009342	0.00771233	0.0202543	0.00642133	0.00557033
Anti_SEA_2_0.5	0.0185385	0.018609	0.0414877	0.0126815	0.0103118	0.017445	0.024616	0.0272598	0.0247827	0.0224943	0.0064245	0.0176847	0.0196717	0.0321593	0.031379	0.026518	0.0106875	0.0564512	0.0516495	0.0294753	0.01832	0.028421	0.0162	0.0256632	0.00668	0.0060965	0.0207552	0.0109325	0.00856625	0.0104222	0.0638112	0.012741	0.0141355	0.00937125	0.0343017	0.017001	0.00830175	0.005729	0.019485	0.0127588	0.00864525	0.0076775	0.0109865	0.0117368	0.0189943	0.00793475	0.0124543	0.0147673	0.0300045
Anti_SEB_1_0.05	0.00598767	0.84189	0.004062	-0.00515133	0.000934333	0.0322457	0.059591	0.003682	0.00145233	0.004606	0.003139	-0.000494667	0.00931467	0.038768	0.00729	0.0145527	0.0267177	0.03079	0.0194563	0.00634967	0.007918	0.032827	0.0105215	0.0113203	0.034544	0.006339	0.0508637	0.006661	0.001205	0.011703	0.039251	0.0135	0.852114	0.00777733	0.0113447	0.007169	0.0104767	0.007358	0.0879277	0.015121	0.00970233	0.0520143	0.00789333	0.00878467	0.0122997	0.008306	0.0346247	0.00902967	0.868093
Anti_SEB_1_0.5	0.0553923	0.864231	0.0980987	0.08181	0.0528495	0.049357	0.0416367	0.0561027	0.054619	0.0519275	0.0234337	0.0524265	0.054815	0.0530132	0.0488032	0.04226	0.0291353	0.0517538	0.0466323	0.0249173	0.041421	0.0543797	0.017918	0.038426	0.0123005	0.0119315	0.0223877	0.0419085	0.020112	0.014789	0.058009	0.0162583	0.847116	0.015818	0.0246405	0.0384205	0.018487	0.0089005	0.0282203	0.0387108	0.0112545	0.0386488	0.0144793	0.0251635	0.017121	0.0139237	0.0262895	0.012959	0.859776
Anti_SEB_2_0.05	-0.000927667	0.512886	0.00220033	-0.005361	-0.004108	0.030255	0.002759	-0.0010835	0.00243933	0.0410293	0.00398767	0.001889	0.0143773	0.0088985	0.0212133	0.02691	0.0167563	0.00819967	0.00795167	0.005587	0.01732	0.00434667	0.0226627	0.059511	0.0052185	0.00304433	0.015671	0.0220153	0.0107267	0.008742	0.0150143	0.007331	0.838735	0.0117527	0.00750367	0.00929467	0.00855333	0.0150053	0.0106147	0.00660967	0.0112613	0.003553	0.012145	0.0102885	0.04213	0.010199	0.0166363	0.0177037	0.315626
Anti_SEB_2_0.5	0.0273827	0.794183	0.0908512	0.068444	0.0572083	0.0579957	0.0446467	0.083827	0.0742915	0.0599515	0.0298097	0.055305	0.0732375	0.074049	0.0559643	0.0757312	0.0510192	0.096841	0.052148	0.057764	0.0552808	0.0644357	0.039251	0.0273222	0.0136288	0.0103158	0.0225243	0.0188512	0.012981	0.0129373	0.0137575	0.00751575	0.8511	0.0116498	0.0109488	0.0337405	0.017838	0.0089325	0.062302	0.021228	0.00973575	0.0106322	0.0197072	0.0202627	0.0213328	0.00933225	0.005555	0.0271398	0.866614
Anti_SEB_3_0.05	0.00371933	0.015286	0.0270235	0.00793567	0.00774	0.00645433	0.00937833	0.0254947	0.00522	0.0135443	0.008361	0.000471667	0.0167545	0.077787	0.0118223	0.032835	0.00463	0.005935	0.00301733	0.00667433	0.00775167	0.008943	0.0137293	0.328333	0.005961	0.0808297	0.012673	0.012055	0.0516207	0.00878067	0.0388407	0.0102097	0.012139	0.00812233	0.0104843	0.024063	0.011835	0.00894833	0.13347	0.008847	0.010408	0.0115597	0.00882667	0.089369	0.0109947	0.020596	-0.000363667	0.054796	0.018589
Anti_SEB_3_0.5	0.0353645	0.092989	0.090188	0.0806495	0.0490183	0.0432747	0.0369442	0.062891	0.0410908	0.052831	0.0293558	0.0405153	0.128831	0.0444733	0.0691403	0.0718957	0.07848	0.074316	0.0760253	0.027788	0.041884	0.0670562	0.0169163	0.113947	0.0120318	0.018226	0.0959928	0.0485	0.02828	0.029764	0.0280723	0.0155932	0.0559168	0.014629	0.0248793	0.043074	0.0143235	0.0104708	0.0463117	0.0132753	0.0146157	0.0271955	0.0148617	0.0377443	0.0193618	0.0212057	0.013967	0.018867	0.0256825
Positive control	0.828606	0.763247	0.810533	0.835415	0.832833	0.828365	0.804515	0.84538	0.842044	0.848497	0.830903	0.867257	0.830091	0.843898	0.87174	0.850821	0.877757	0.83432	0.832057	0.851714	0.881402	0.872708	0.853499	0.862613	0.736988	0.681292	0.852636	0.801847	0.811655	0.825037	0.807162	0.828881	0.832241	0.810827	0.827618	0.8474	0.832128	0.866593	0.830329	0.812003	0.829495	0.820855	0.810762	0.873696	0.822796	0.837687	0.847432	0.871563	0.726358
Anti_PVL_1_0,05	0.421179	0.0103253	-0.00303933	-0.0121393	-0.00486667	-0.00281133	0.007586	0.003558	0.012281	0.00156267	0.0217623	-0.00412733	0.432129	0.60768	0.559634	0.316578	0.400753	0.118647	0.0637797	0.061921	0.839296	0.478995	0.00706267	0.0224663	0.024545	0.00682067	0.0345043	0.110051	0.010662	0.0115947	0.112719	0.00835633	0.0341493	0.040976	0.00801667	0.00557733	0.00883067	0.00962	0.012419	0.0115713	0.00735467	0.00937833	0.0223833	0.0636773	0.010462	0.00769833	0.00455533	0.0127903	0.0138007
Anti_PVL_1_0,5	0.797926	0.042296	0.049492	0.0803067	0.0234332	0.029618	0.020502	0.0291913	0.0374435	0.0260627	0.036319	0.0276445	0.846691	0.864474	0.883304	0.803545	0.888059	0.432756	0.25931	0.187199	0.89	0.872565	0.0177378	0.0165075	0.121469	0.005612	0.015863	0.538954	0.0216687	0.0194617	0.0155325	0.0123312	0.0542207	0.324992	0.026199	0.0266497	0.016374	0.008521	0.0295198	0.0156125	0.005293	0.013843	0.0152323	0.229941	0.0188073	0.0307273	0.0131845	0.019262	0.0114765
Anti_PVL_2_0,05	0.232102	0.0212147	0.001919	-0.00297867	-0.00684667	-0.00231	0.000461333	0.00839133	0.000406	0.00133333	0.00400233	-0.000850333	0.553044	0.74734	0.400777	0.255553	0.429973	0.144769	0.0520733	0.0559917	0.883393	0.403844	0.0132447	0.012907	0.0315273	0.00560867	0.010094	0.095601	0.0373743	0.00533933	0.0108467	0.008394	0.014401	0.0560587	0.0355087	0.00909833	0.00518367	0.00590567	0.0232763	0.00418867	0.0610647	0.00617333	0.0123923	0.0287797	0.0146137	0.0195283	0.0184	0.0301997	0.008708
Anti_PVL_2_0,5	0.826194	0.029843	0.0963097	0.04573	0.0213183	0.0590622	0.0223477	0.0316113	0.0179713	0.0163853	0.0103715	0.013734	0.847938	0.859231	0.886396	0.709101	0.883079	0.456851	0.221598	0.327286	0.890055	0.868922	0.0662102	0.0290943	0.153776	0.00552375	0.0102945	0.514049	0.733294	0.0125962	0.028513	0.0318428	0.0609812	0.36856	0.323317	0.02399	0.0108285	0.00732	0.019368	0.00637325	0.0074345	0.0120735	0.016708	0.17636	0.0870392	0.0222418	0.008186	0.008905	0.0106128
Anti_PVL_3_0,05	0.544538	0.00785567	-0.00430633	-0.00577833	0.00639267	-0.00259633	0.00848633	0.024265	0.001221	0.00292133	0.005507	0.00351333	0.659934	0.844949	0.840401	0.535975	0.631559	0.207037	0.108923	0.100983	0.815477	0.785292	0.00761	0.080383	0.049592	0.013383	0.014408	0.177885	0.00387733	0.00728	0.0187383	0.0101993	0.00794367	0.0743303	0.00525167	0.0114917	0.0131277	0.0102403	0.0194813	0.0381873	0.0385057	0.000909333	0.0157883	0.0483143	0.0100807	0.00690933	0.00175	0.006134	0.00859333
Anti_PVL_3_0,5	0.85309	0.0171505	0.0704448	0.0436728	0.0324077	0.0544033	0.01702	0.021289	0.021042	0.032064	0.0106812	0.0260395	0.849478	0.858432	0.868941	0.784199	0.89096	0.574165	0.392271	0.389361	0.891071	0.780397	0.0240843	0.0172433	0.212457	0.056025	0.0203907	0.738188	0.233747	0.0144398	0.014745	0.0147653	0.0249945	0.410688	0.0164677	0.0252337	0.0192978	0.00801275	0.0265007	0.0100298	0.009014	0.0115412	0.00879475	0.338151	0.0211512	0.01171	0.0131898	0.075536	0.00744625
Anti_TSST_1_0.05	0.646172	0.527919	0.81484	-0.00491967	0.00481033	0.000898333	0.82835	0.00541233	0.0171017	0.841676	0.851612	-0.00216133	0.0204473	0.0444093	0.0249583	0.009759	0.0235923	0.531983	0.753675	0.658141	0.0186267	0.0578963	0.859042	0.853696	0.00559467	0.850711	0.0155373	0.017943	0.631889	0.00744533	0.828534	0.00516067	0.0199173	0.00896733	0.882947	0.00643067	0.012509	0.007236	0.500339	0.00737367	0.008287	0.868852	0.011012	0.161323	0.009349	0.0235713	0.0217983	0.0124007	0.00830067
Anti_TSST_1_0.5	0.843455	0.855472	0.743116	0.052221	0.0195388	0.031104	0.843249	0.0200818	0.0259568	0.85145	0.77659	0.0194167	0.0538145	0.0544957	0.0360615	0.0497647	0.067555	0.869804	0.874107	0.847028	0.0515297	0.0347737	0.854455	0.847924	0.0139282	0.886779	0.0165913	0.0341015	0.903645	0.00905875	0.846893	0.0082835	0.0184433	0.0258253	0.880608	0.031607	0.009566	0.0113193	0.76825	0.008612	0.010233	0.880976	0.0181943	0.0156592	0.014661	0.036356	0.0045605	0.007338	0.014217
Anti_TSST_2_0.05	0.755859	0.800289	0.831599	-0.00710467	0.00619167	0.000913667	0.838367	0.00732367	-8.33333e-06	0.82902	0.881115	0.000108	0.0153157	0.039482	0.007382	0.0212705	0.00315567	0.59688	0.850001	0.664035	0.003655	0.00405733	0.857576	0.860665	0.009387	0.889237	0.0102233	0.0311497	0.675308	0.00860467	0.84832	0.0115623	0.020928	0.00908567	0.881857	0.0276467	0.00374033	0.0100723	0.687955	0.00599767	0.0234517	0.887421	0.0981957	0.00900533	0.0169903	0.0133627	0.0216793	0.00839567	0.010694
Anti_TSST_2_0.5	0.836332	0.859154	0.828009	0.0265617	0.021844	0.016989	0.835495	0.026612	0.0110238	0.844756	0.813168	0.0120705	0.040522	0.0522187	0.0220877	0.032873	0.0374787	0.878393	0.870149	0.856624	0.020931	0.013631	0.848904	0.845537	0.00425325	0.88292	0.0174708	0.0131922	0.903156	0.0075645	0.84047	0.00855175	0.027789	0.0626793	0.868611	0.031679	0.00762125	0.0050995	0.856845	0.129616	0.0141268	0.878524	0.0153455	0.0107445	0.0105247	0.00995	0.0112345	0.0168945	0.012561
[truncated: 61 more columns]

## Sheet: DNA
substance_name strain ID	94003	91892	189812	119087	94007	94009	94011	241318	196911	94665	124627	196916	124414	150242	132482	94015	205975	124407	124741	124664	145330	124474	238256	238234	238254	238236	238239	238245	238248	238242	238249	238240	238237	238243	238246	238252	238247	238251	238235	238253	238238	238255	238241	238244	238233	138826	138830	138831	238250
	Chip_STAU-PM_ASP_7_260208	Chip_STAU-PM_ASP_7_260208	Chip_STAU-PM_ASP_7_260208	Chip_STAU-PM_ASP_7_260208	Chip_STAU-PM_ASP_7_260208	Chip_STAU-PM_ASP_7_260208	Chip_STAU-PM_ASP_7_260208	Chip_STAU-PM-7plus_300511	Chip_STAU-PM_ASP_7_260208	Chip_STAU-PM_ASP_7_260208	Chip_STAU-PM_ASP_7_260208	Chip_STAU-PM_ASP_7_260208	Chip_STAU-PM_ASP_7_260208	Chip_STAU-PM_ASP_7_260208	Chip_STAU-PM_ASP_7_260208	Chip_STAU-PM_ASP_7_260208	Chip_STAU-PM_ASP_7_260208	Chip_STAU_PM6_120107 plus Chip_STAU_PM5_4_100306	Chip_STAU-PM_ASP_7_260208	Chip_STAU-PM_ASP_7_260208	Chip_STAU-PM_ASP_7_260208	Chip_STAU-PM_ASP_7_260208	Chip_STAU-PM_ASP_7_260208	Chip_STAU-PM_ASP_7_260208	Chip_STAU-PM_ASP_7_260208	Chip_STAU-PM_ASP_7_260208	Chip_STAU-PM_ASP_7_260208	Chip_STAU-PM_ASP_7_260208	Chip_STAU-PM_ASP_7_260208	Chip_STAU-PM_ASP_7_260208	Chip_STAU-PM_ASP_7_260208	Chip_STAU-PM_ASP_7_260208	Chip_STAU-PM_ASP_7_260208	Chip_STAU-PM_ASP_7_260208	Chip_STAU-PM_ASP_7_260208	Chip_STAU-PM_ASP_7_260208	Chip_STAU-PM_ASP_7_260208	Chip_STAU-PM_ASP_7_260208	Chip_STAU-PM_ASP_7_260208	Chip_STAU-PM_ASP_7_260208	Chip_STAU-PM_ASP_7_260208	Chip_STAU-PM_ASP_7_260208	Chip_STAU-PM_ASP_7_260208	Chip_STAU-PM_ASP_7_260208	Chip_STAU-PM_ASP_7_260208	Chip_STAU-PM_ASP_7_260208	Chip_STAU-PM_ASP_7_260208	Chip_STAU-PM_ASP_7_260208	Chip_STAU-PM-7plus_300511
1,2-aadD	0.7611	0.0035075	0.819392	0.0242705	0.822257	-5.3e-05	0.0004315	0.0060765	0.000593	-0.001012	0.003651	0.0085615	0.0016145	-0.000355	0.0051445	0.005855	-0.0004055	-0.001832	-0.0001265	0.00146	-0.0001975	-0.0009245	0.0050455	-0.0008715	-0.003149	-0.0060655	0.037933	0.000936	0.0011625	-2.4e-05	-0.0003885	-0.000992	-0.003629	-5.6e-05	0.0067755	-0.0044825	-0.0015495	-0.0012255	-0.0012255	-0.001766	0.0012085	0.009432	0.0003125	-0.002022	0.0060525	-0.0005135	-0.000719	-0.001363	0.002492
13,2-mupR	0.0078195	0.002411	0.000938	-0.0005565	-0.0042155	0.0039065	0.002581	-0.0020655	0.001605	0.0047815	0.0040235	-0.000624	0.002711	0.025332	-0.00206	0.003201	-0.003497	0.0019305	0.770222	-0.0011935	0.0021685	0.0220675	0.004415	0.0039485	0.0285855	0.0061965	0.029466	0.006208	0.0024655	-0.0007475	-0.002597	0.0043705	-0.000861	0.0034875	0.003793	0.0012015	0.0001275	0.0016625	-0.001854	-0.0038605	0.004497	0.0115665	0.0020085	-0.0020485	0.002203	0.0025065	0.0246345	0.020479	-0.000256
15,3-msrA	0.000264	0.0027185	-0.003334	0.0375235	-0.001963	0.001745	0.002966	0.009105	0.008281	0.0019515	0.0027875	-0.000192	0.000393	0.0190715	-0.001078	0.002245	0.650351	-1.15e-05	-0.010562	-0.0144	0.773448	-0.0006645	0.0005075	0.0020975	-0.000349	-0.001096	0.0080605	0.005076	0.0040065	0.0007865	-0.0053805	0.0048755	0.0040605	-0.00091	0.003911	0.002787	0.001259	-0.000125	0.0022675	0.001142	0.0029935	0.0217035	0.004799	0.001969	0.0154595	0.001079	-0.0037685	-0.0005985	-0.001051
15,3-vatA	0.000836	0.002889	-0.0003455	0.0340145	0.002723	0.002876	0.0052855	0.004108	0.0006735	0.006892	-0.0002705	0.00176	0.0042895	0.006962	0.0012255	0.0081055	0.002443	-0.0034305	-0.001431	0.0048225	-0.00144	-0.0060615	0.0068625	0.008116	0.0019855	-0.000386	0.0045735	0.0063335	0.0050885	-0.000452	0.0006475	0.000837	0.0001985	-0.001924	0.0072655	-0.0026805	0.001264	0.000691	0.0014845	-0.000812	0.0049115	0.0269805	0.0098815	-0.000757	0.0187525	0.0021245	-1.5e-05	-0.000538	0.0014265
16,3-vatB	0.001833	-0.0022405	-0.0008935	0.0513655	0.000435	0.0030375	0.00219	0.0075195	0.026319	0.002612	0.0104645	-0.0050585	0.0033555	0.014664	0.0013715	0.0072315	-0.0041375	-0.001126	-0.009659	0.008265	0.0055005	-0.0033365	0.219247	0.0022275	0.009356	0.000846	0.0053765	0.0717455	0.114861	0.002961	0.140155	0.0020065	0.000956	0.004634	0.212619	0.0055605	0.0360995	0.0017835	0.0001145	0.00039	0.004561	0.0226005	-0.0003695	-0.0026755	0.0118185	0.082364	-0.00054	0.003154	0.001523
17,3-vga	0.003603	0.0045745	0.0244885	0.0515695	0.0229605	0.069472	0.041346	0.020795	0.0659285	0.011323	-0.0021435	0.17038	0.011059	0.0623545	-0.004574	0.004608	0.004679	0.0007735	0.001232	0.0082005	0.0432255	0.045645	0.0308905	0.045334	0.021999	0.0050605	0.031487	0.131798	0.073085	0.0282615	0.0632075	0.0436375	0.001789	0.0579895	0.036182	0.0364685	0.044749	0.0172885	0.009789	0.112119	0.017285	0.0838315	0.05935	0.0645015	0.056867	0.169762	0.071174	0.0796325	0.0367705
18,2-vanA	0.0086005	5.65e-05	-0.004089	0.007518	-0.0006925	-0.001342	-0.002585	0.0018435	0.0009965	0.003484	0.0025205	0.002475	0.0007205	0.0018135	0.004153	0.007385	0.006026	-0.003494	-0.002941	0.00735	-0.017094	-0.000907	-0.0010945	0.003247	0.0001465	-0.0001235	0.0010545	0.003128	0.0015415	0.0008655	-0.000495	0.001425	0.000373	-0.0005485	-0.000849	0.0024625	0.0023075	-0.0028885	0.0029665	0.0004245	0.001161	0.0124955	0.006185	3.3e-05	0.0104795	0.003562	0.0030065	-0.003555	0.002438
18,3-vgaA	-0.0017315	0.0134095	0.004014	0.028889	0.004681	-0.0023085	0.002656	-0.007937	-0.003675	0.001075	-0.0020765	0.0020595	0.008623	0.70121	0.000644	0.0076885	0.0022025	0.002424	-0.006129	0.0006705	0.008784	0.039753	0.0083355	0.0043305	0.0439785	-0.0033625	0.053179	0.0012385	0.006324	0.001894	0.005243	0.0330475	-0.004829	0.0030105	0.0013875	-0.0017595	0.000173	0.0006955	-0.00191	0.0020885	0.0009865	0.0062745	-0.0027425	-0.001287	0.008528	0.028648	0.0449155	0.035282	0.000962
19,2-vgb	0.0055695	0.029117	0.000961	0.020903	0.004546	0.000312	0.0063625	-0.0040845	-2.25e-05	-0.002531	0.0003385	0.010917	9.85e-05	0.0012795	-0.002377	0.0046585	-0.000884	-0.010109	-0.005815	0.005925	-0.001211	0.000252	0.000619	0.002982	-0.0030125	-0.001384	0.000736	0.00246	0.0052825	-0.0016105	0.0043355	-0.0007735	-0.000137	0.0008865	-0.0027985	-0.0029895	0.000186	-0.0011945	-0.0017265	-0.001246	0.0038	0.011022	0.0014035	-0.003447	0.0074535	-3.45e-05	-0.0025605	-0.0010175	0.0005105
19,3-vanB	0.003257	-0.001399	0.0025915	0.061351	-0.0033715	0.002358	0.007735	-0.00254	0.0013075	0.001766	0.000299	0.0056625	0.0037405	0.013388	0.0035635	0.002362	-0.003481	0.0010865	-0.002426	-0.000549	-3.8e-05	0.0039225	0.01819	0.0085135	-0.0017605	0.0029685	1.5e-06	0.0179635	0.028317	0.0010225	0.0085345	-0.0049715	0.006329	0.003657	0.0286255	0.00305	0.0070655	-0.0027545	0.004986	0.008531	-0.00063	0.016651	0.0013285	0.008487	0.0095485	0.00322	-0.003288	0.002382	0.0017545
2,1-dfrA	0.006641	0.144433	0.005495	0.026348	0.0304325	0.071819	0.0422655	0.0237905	0.0474915	0.0262615	0.0053015	0.118976	0.0125315	0.037138	0.0037615	0.411204	0.006965	0.0052235	0.0011195	0.001898	0.0123185	0.0439945	0.101386	0.0505745	0.030043	0.002751	0.0374985	0.286282	0.16381	0.0468025	0.179185	0.069788	0.0029265	0.111789	0.09801	0.0989935	0.155845	0.0373615	0.0190275	0.204765	0.0217625	0.0941665	0.118383	0.113543	0.093835	0.112185	0.066067	0.0639315	0.0289745
20,3-vanZ	-0.002768	0.0523815	0.0020285	0.022543	0.0028415	0.005368	-0.0037005	0.0020325	-0.0007085	-0.0055275	-0.001998	-0.0018115	0.000863	0.020831	0.0051675	0.006042	0.001135	-0.005113	-0.0007955	0.004157	-0.0002925	0.0035655	0.0047495	0.005426	0.006739	0.007595	0.0115155	0.009294	0.0065025	0.0001395	0.0050545	0.0071245	0.006129	0.0034915	0.0027505	-0.0002025	0.003389	0.0008945	0.001589	0.0052045	0.0034375	0.0254025	0.0048555	0.000877	0.012057	-0.0008215	0.0013365	0.006579	0.004016
3,2-entA	0.705725	0.008018	0.0009585	0.017832	0.815285	0.822089	-0.004041	0.002874	-0.0009405	0.011535	0.105427	-0.004376	0.806612	0.0008825	0.002692	0.002604	-0.00531	0.001364	-0.002481	0.412496	0.781147	0.0002455	0.0013075	0.005305	0.003904	0.0050045	0.008194	0.0110995	0.0035615	0.0025715	0.0032085	-0.001133	0.010643	0.0024475	0.006812	0.002773	-0.002461	-0.0004595	-0.0024295	-0.0011075	0.0016705	0.0154865	-0.0004715	0.000813	0.0154295	0.0004125	0.0017165	5.3e-05	0.000383
3,3-entA	0.752614	0.006658	0.0617045	0.018267	0.824717	0.824667	-0.00289	0.0097885	-0.0055755	0.0033405	0.608629	-0.0028845	0.821891	0.0084625	0.001022	0.0035965	-0.0004675	0.003583	-0.0044735	0.30248	0.779498	0.001295	0.406394	0.0117765	0.006895	0.005466	0.0025435	0.124064	0.143625	0.001905	0.101262	0.0431635	0.000643	0.0037035	0.426558	0.009175	0.067298	0.0024165	0.002302	0.005784	0.0066365	0.016017	0.0031315	0.0023055	0.0037225	0.004376	0.000289	0.002411	0.0021885
4,1-entB	0.0080905	0.0003455	0.0014975	0.185941	0.0028145	0.004323	-0.0007925	0.0041765	0.160537	0.776679	0.144218	0.004221	0.789764	0.002026	0.0225075	0.008295	0.0039005	0.0020745	0.0022195	0.0022865	0.094052	0.74722	0.0173245	0.0051785	-0.0026905	0.423218	0.68642	0.74643	0.723402	0.640089	-0.003493	0.766334	0.322053	0.746692	0.604523	0.701429	0.611568	0.699121	0.0010845	0.742421	0.620184	0.0141255	0.785073	0.757381	0.0106975	0.450346	-0.001757	-0.0035055	0.0034655
5,2-entC	0.739564	0.003836	0.799425	0.791189	0.004795	-0.001769	0.000247	0.0002515	0.705506	0.003788	0.808123	0.000621	0.0054115	0.000606	0.655363	0.0052045	-0.0011215	-0.0133395	0.00083	0.320968	0.756887	0.004381	-3.25e-05	0.0052945	0.000377	0.0035075	0.003632	0.0036805	0.004545	-0.001143	0.004225	-0.0019575	-0.004511	-0.0024485	0.004924	-0.0021165	-0.000859	0.002013	0.0013735	0.0019505	0.000381	0.016879	0.001007	0.0041885	0.0115895	0.765227	-0.0002135	-0.0016855	0.002531
5,3-entC	0.809635	0.003701	0.835733	0.822788	-0.00058	0.004869	-4.5e-06	-0.0049725	0.669865	0.007834	0.832719	0.0014995	0.000378	-0.0004785	0.774771	0.0075795	0.0033515	-0.002306	0.001636	0.716597	0.764548	0.000412	0.00036	0.004639	-0.000489	0.0010355	0.0016785	0.0039415	0.001314	0.001565	0.000354	0.005043	0.001939	0.000159	0.0035165	0.0051415	-0.0011125	0.0035305	0.003611	0.003058	0.001429	0.008638	-0.001881	0.0037915	0.010175	0.738126	-0.0049245	4.5e-05	0.0036185
8,2-etA	-0.002715	0.0072835	0.001909	0.0242385	-0.002269	0.0017415	0.0014905	-0.005354	0.0223635	0.001801	0.003773	0.0093995	0.0009945	0.008291	0.006101	0.000638	0.0044615	-0.000384	0.0020505	0.0075065	0.0028195	-0.002713	0.642362	0.0020125	0.684562	-0.0051195	0.001774	0.0052205	0.004908	-1.75e-05	-0.0018325	-0.0020615	-0.0002775	0.0004305	0.0009225	0.00092	0.0019885	0.0053235	0.003759	-0.005144	-0.0009835	0.676795	0.001098	0.00087	0.002928	0.0548985	0.0030705	0.004924	0.003727
9,3-etB	0.0071715	0.001362	0.002398	0.0090455	0.0218585	0.016114	0.0044215	-0.001426	0.0024175	0.00763	0.0031545	0.013852	0.002159	0.0065305	-0.003173	0.0023735	-0.003466	-0.0039185	0.002702	0.0010935	0.007264	0.004979	0.636106	0.004875	0.000705	-0.009476	0.005569	0.009448	0.005017	-0.0007095	0.0013905	0.005005	0.000579	0.0028815	0.0114785	0.0040325	0.013842	0.0037055	0.000651	0.0091105	0.002612	0.641573	0.001609	0.00203	0.205698	0.004584	0.016216	0.01014	0.0003375
Biotin-Marke_2,5ÂµM	0.771859	0.863646	0.805188	0.833576	0.822585	0.814451	0.806469	0.737185	0.739327	0.810786	0.844869	0.72599	0.841739	0.771304	0.780288	0.563973	0.718106	0.338644	0.438633	0.429708	0.740142	0.72639	0.704867	0.771159	0.823368	0.595136	0.750826	0.809604	0.564845	0.632794	0.660945	0.831264	0.49393	0.712461	0.674216	0.68393	0.629126	0.695588	0.769962	0.731227	0.762774	0.736951	0.804748	0.782546	0.768433	0.837747	0.788465	0.808468	0.784212
aacA-aphD-10,4	0.794924	0.0031685	-0.000299	0.05927	-0.0008645	-0.002687	-0.002952	-0.001902	0.001457	0.002085	0.003685	0.0087705	0.0010525	0.755706	-0.0008295	0.423755	0.464192	-0.0071045	0.005616	0.0052105	0.773123	0.0047875	0.0129575	0.003181	0.0057465	-0.004879	0.007086	0.0103605	0.0059385	-0.0018185	0.0072895	0.0040835	0.002	0.0016255	0.0213315	0.001818	0.004138	0.0033425	0.00248	0.0012255	0.004604	0.017633	7.7e-05	0.0017145	0.008477	-0.0002925	-0.001222	0.003628	0.0006455
agrB-III_11	0.000382	0.0126925	0.0010695	-0.0016235	0.831926	0.847543	0.0004145	0.0079465	-0.000842	0.001371	0.002725	-0.002875	0.003026	0.00016	0.000893	0.006904	-0.002991	-0.002806	0.02926	0.571684	0.0140525	-0.00215	0.0022065	0.0006145	-0.0020425	0.002857	0.001351	0.004866	0.000905	-0.001367	-0.003887	0.0070735	0.0022665	0.000186	0.004625	0.003307	0.002054	0.0009555	-0.0017105	-0.000978	-0.0011775	0.0120145	0.000238	0.003254	0.004519	-0.001302	-0.003435	0.0002935	0.0004865
agrB-II_11	0.801084	-0.002848	0.821317	0.818169	-0.0023125	0.0066315	0.004607	0.741969	0.691904	0.0045955	0.0056305	0.666515	-0.000158	0.731178	0.773956	0.000454	0.0043415	0.001783	0.002067	0.007318	0.763064	-0.0010935	0.0148675	-0.00083	-0.003338	0.0045125	0.001459	0.0474205	0.0211795	0.0024605	0.0037205	-3.9e-05	0.004684	0.0025325	0.0323025	0.006348	0.0070035	-0.001043	0.0007495	0.0001075	0.0056535	0.0371715	0.001595	0.0029395	0.012497	0.801669	0.789347	0.795075	0.007093
agrB-IV_11	0.012026	0.004834	-0.005488	0.041842	-0.003324	-0.001298	0.524146	0.0009765	0.00214	0.468688	0.411305	0.007189	0.408517	0.0031865	-0.0070845	0.011683	0.032178	-0.000796	0.0005935	0.0041645	-5.8e-05	0.577794	0.667925	0.730178	0.798502	0.5152	0.724771	0.768512	0.733518	0.699306	0.77126	0.795565	0.311535	0.752976	0.644521	0.68366	0.572489	0.684716	0.750918	0.759571	0.732909	0.714844	0.832064	0.795889	0.738277	0.0070835	-0.005511	0.001768	0.814101
agrB-I_11	0.00701	-0.004629	0.0020225	0.0214905	0.0017015	-0.0003535	0.823808	0.004492	-0.0002855	0.798835	0.82189	0.004774	0.811503	-0.000437	0.0001445	0.0044035	0.636051	0.574839	0.524412	0.0063495	-0.0001545	0.743127	0.495159	0.429183	0.394604	0.0460695	0.38557	0.589566	0.347558	0.264004	0.415442	0.546442	0.102761	0.394808	0.377084	0.442933	0.423703	0.29148	0.237974	0.589393	0.0920445	0.28577	0.557478	0.380907	0.291652	-0.0022105	0.0016645	0.0013545	0.758404
agrC-III_11	-0.0014135	0.0020265	-0.002252	0.0016815	0.761567	0.815569	0.001197	0.0017085	0.004003	0.004454	-0.0013685	0.0009475	-0.002702	0.0144475	0.0048935	0.0150615	-0.0010525	0.0056665	-0.002114	0.324309	-0.002092	-0.0025945	-0.004405	0.0061165	-0.0003705	0.0113215	-0.0007175	0.0055875	-0.001816	-0.0012025	0.00181	-0.003487	0.002493	-0.0014655	-0.0009505	0.000162	0.0013315	-0.001225	0.006963	0.001994	-0.0003705	0.058491	0.003659	0.0022825	0.0089285	0.0062635	0.0064545	0.003592	0.004161
agrC-II_11	0.761682	0.001169	0.79906	0.814658	-0.000285	0.0016375	-0.0008985	0.698976	0.679211	0.001118	-0.002696	0.660903	0.0013905	0.713655	0.741702	-0.000242	0.0019895	0.0043915	-0.0061225	0.0122445	0.758275	0.00236	0.0045325	-0.00109	0.000394	0.001816	-0.0008835	0.023672	0.014811	-0.00495	0.0260495	0.0006425	0.002349	-0.0016985	0.0068535	0.0018005	0.0028045	0.0024495	0.0040375	0.007989	0.0032895	0.017023	0.0019335	-0.0018985	0.0117495	0.797096	0.783697	0.790123	0.0055945
agrC-IV_11	-0.0020395	-0.000581	-0.004259	0.034282	-0.0008795	-0.0026035	0.000923	-0.004734	0.0028805	0.00115	5.85e-05	0.000513	-0.0005755	0.0086095	0.0061735	0.0040435	0.001099	-0.003292	0.0031325	-0.001213	0.007202	0.0012275	0.65242	0.723008	0.770228	0.513284	0.712082	0.750575	0.72396	0.672066	0.751503	0.789308	0.422853	0.739377	0.628774	0.6726	0.579136	0.689326	0.727438	0.745664	0.688874	0.70841	0.816159	0.786709	0.715976	-0.0023745	0.0032855	0.001726	-5.15e-05
agrC-I_12	-0.004137	-0.0033675	0.001202	0.030297	-0.0009485	0.0027005	0.80084	0.0023595	0.0004645	0.767873	0.791104	0.00926	0.759906	0.134128	0.005145	0.0049415	0.42232	0.312202	0.141709	0.006797	0.008204	0.715611	0.684352	0.731434	0.716191	0.370617	0.695979	0.787211	0.707736	0.662197	0.759401	0.779449	0.23481	0.744022	0.635506	0.711855	0.634854	0.711593	0.600058	0.762688	0.573381	0.713735	0.787775	0.796038	0.726387	0.231664	0.124893	0.161585	0.770752
agrD-III_11	0.0029015	0.000911	0.005813	0.0188945	0.833423	0.845301	0.000727	0.001203	-0.0002075	0.0036255	-0.0062345	0.0082115	0.0007755	0.006884	0.009931	0.010442	-0.00088	-0.0023385	-0.0059665	0.710068	0.0074265	0.0001555	-0.0009405	-0.002176	0.0012155	8.1e-05	-0.001657	0.0016685	0.0046095	-0.0002915	-0.0018675	0.000514	0.003975	0.0019055	0.00188	0.003037	-0.000379	0.000533	0.002589	0.0005395	0.0018055	0.0067515	0.0034425	5e-05	0.006275	0.0008395	0.004408	0.001464	0.019214
agrD-II_11	0.785808	-0.000213	0.821242	0.711103	-0.0024955	-0.0019825	-0.0004095	0.744019	0.695472	0.0033415	-0.0025705	0.712259	-0.0012095	0.732032	0.392278	0.000693	-0.001807	0.008652	0.001815	0.001037	0.769409	0.0002535	0.0096285	0.003501	0.0012885	-0.002094	-0.000733	0.0025085	0.0064365	0.0009715	0.004301	-0.0015225	0.0370165	0.005337	0.0149305	-0.0021985	0.0035855	-0.0011895	0.0033805	0.0017755	0.004593	0.017469	-0.0032455	0.001736	0.0074075	0.796158	0.751174	0.761251	0.0016815
agrD-I_11	-0.0016175	0.0089645	0.0047435	0.022912	0.0018245	-0.001223	0.825246	0.000544	-0.0006405	0.814747	0.833827	0.014109	0.81569	0.0042565	-0.000572	0.006123	0.588646	0.657582	0.720958	0.004673	0.000726	0.7378	0.0138715	0.0068805	0.0080435	0.0016105	0.007023	0.025642	0.0140735	0.0016145	0.011379	0.006464	0.00196	0.003657	0.0091995	0.011112	0.0122865	0.0100445	-0.000214	0.0070835	0.00435	0.0209895	0.003102	0.004409	0.008263	0.002359	-0.0002415	0.0010885	0.80076
agrD-I_12	3.85e-05	0.0056735	0.0043175	0.020105	-0.0002265	0.001563	0.827787	-0.0007	0.001428	0.815187	0.832209	0.002228	0.823165	0.0024155	0.0015015	0.0061035	0.488962	0.580272	0.658737	0.0070265	-0.0021065	0.755678	0.0162965	0.0090335	0.0003065	-0.004363	0.004186	0.0144095	0.003046	0.000242	-0.0001115	0.0056895	0.001971	0.0011775	0.02264	-0.0004675	0.001959	0.003804	-7.95e-05	0.005975	0.00097	0.0228315	8.5e-05	0.002865	0.009612	0.00131	0.012484	0.004856	0.78117
agrD-I_13	0.006177	0.001529	-0.000327	0.006516	0.0029385	0.000112	0.841375	0.008448	-0.0035625	0.8315	0.83496	0.0132395	0.833699	-0.000668	0.0035675	0.000347	0.536084	0.582793	0.638748	0.0071645	0.013553	0.778935	0.021199	0.005699	0.0103555	0.0029365	0.007477	0.0362835	0.0475305	0.009516	0.035034	0.0158315	-8.2e-05	0.0022065	0.0134735	0.005904	0.0213785	0.008879	0.0025995	0.013951	0.0029005	0.0213165	-0.0016685	0.0020445	0.0082715	0.0068835	0.0008055	0.0030155	0.824253
aphA-3-18,3	0.0017695	-0.000375	0.005188	0.0466165	0.0040735	0.001007	-0.0004005	3.1e-05	0.0004225	0.0007255	0.007774	0.0058965	-0.0014315	0.0016115	9e-06	0.55208	0.667288	-0.0033635	0.000853	0.0061145	0.766175	0.0020005	0.022691	0.011211	0.005163	0.004215	0.0106225	0.0203275	0.0085235	-0.0015605	0.012519	0.0066905	-0.002339	0.0025805	0.034298	0.0015145	0.0068355	-0.0009975	0.000686	-0.000341	0.007882	0.031858	0.002403	-0.000262	0.0179335	0.005294	-0.0012865	-0.000437	-3.1e-05
blaZ_11	-0.000906	0.858831	0.839346	0.0720445	0.828119	0.851226	-9.3e-05	0.723042	0.00749	0.000457	-0.0026185	0.000838	0.828549	0.736998	0.012456	0.789961	0.710056	0.537363	-0.0036895	0.757283	0.743269	0.715111	0.681279	0.745605	0.802575	0.70273	0.741302	0.769694	0.763191	0.701526	0.792737	0.788529	0.572437	0.773382	0.659504	0.705621	0.618339	0.728869	0.76879	0.780345	0.745752	0.720899	0.828972	0.809823	0.734404	0.001735	-0.000463	0.003254	0.795635
dfrA_12	0.012806	0.462019	0.001599	-0.003766	0.001136	0.000917	0.001877	0.034265	-0.0020665	-0.001111	0.0035	0.00124	0.002831	-0.0026385	-0.002507	0.464288	-0.001238	-0.0003505	-0.001421	0.007235	-0.0028175	0.0011305	0.004244	0.003679	0.0013565	0.004161	0.0015445	0.0082475	0.0048805	0.001581	0.001586	-0.0003995	-0.0006245	0.0014805	0.005978	0.000766	0.00662	0.0032485	-0.003081	0.0018985	0.0028095	0.0125455	0.003296	0.001803	0.006813	8.95e-05	-1e-05	-0.0055785	0.0019935
edinA_11	-0.0044905	0.034861	0.001445	0.0027635	0.004127	0.003574	0.0028805	0.002722	0.0024035	0.0008555	-0.005492	0.0150485	0.0008055	0.0095345	-0.003015	0.0086275	0.0017925	0.004758	0.0043895	0.0063605	0.0049195	0.003782	0.027145	0.0011355	-0.0047005	-0.0016085	0.0024095	0.0059415	0.013339	0.0008865	0.002654	-0.0059685	-0.001428	0.000137	0.0446305	0.001311	0.003009	-0.003164	0.000588	-0.003056	-0.001442	0.0063665	0.000515	-0.003393	0.003351	-0.002941	-0.000382	0.008109	-0.000431
edinB_11	0.0049315	0.005365	0.002496	-0.003446	-0.0015935	-0.0046725	0.0017245	0.0141085	0.001636	0.0027865	-0.0009825	0.005818	-0.0061505	0.0105915	-0.000527	0.0049365	0.0007985	-0.005852	0.009693	-5.75e-05	-0.0038	-0.001394	0.0537	0.0017295	-0.000446	-0.0019135	-0.001101	0.020532	0.0194305	-0.0013235	0.012873	-0.0013645	-0.001557	0.0011385	0.148396	0.005007	0.0195295	0.0072935	-0.000496	-0.000323	0.002568	0.0059965	0.00034	0.001108	0.0023335	0.0051635	0.0002595	-0.0032165	0.804978
edinC_11	0.0036665	0.003624	-0.001455	0.0001395	0.0017855	-0.00502	0.0029055	0.003466	0.00373	-0.002716	-0.001137	0.001042	0.000207	0.003211	0.0004735	-0.0029565	-0.00275	-0.0047045	-0.0052825	0.027437	0.0031035	0.0119195	0.576788	0.003179	0.0015025	-0.002863	0.001708	0.003721	0.0094015	0.000232	0.0027145	-0.00298	-0.0018385	0.001419	0.013659	-0.0004845	-0.0018475	0.002919	-0.0025095	0.002529	0.0011255	0.686219	-4.85e-05	0.0085845	-7.4e-05	-0.0029385	0.002047	0.0031	-0.0008635
entA-var1_11	0.75311	0.007076	-0.00288	0.01822	0.810558	0.821281	0.0037605	-0.006485	0.004823	0.004754	0.009852	0.0035815	0.794833	-0.0009215	0.002742	0.001754	0.002909	0.0027525	-0.005418	0.48517	0.780208	-0.0041645	0.0008925	0.006896	0.000229	-0.003179	0.0013885	0.0056895	0.0022825	0.0033945	-0.003582	-0.0021155	5.45e-05	0.0003445	-0.001591	-0.00218	0.0018295	0.0018085	-0.001196	0.003514	0.0044125	0.02338	-0.001572	0.001625	0.008102	0.0072595	0.00562	0.008853	0.0026905
entA-var2_11	0.015562	0.012589	0.0035695	0.0519505	0.009234	0.044602	0.0061875	0.0030735	-0.005097	-0.0035775	0.814026	0.0057705	0.0045325	0.0079805	-0.001948	0.0054275	-0.0037525	-0.0030195	0.003175	0.005213	0.0897	-0.0008845	0.070125	0.0066495	0.002188	0.006872	0.001797	0.06456	0.095546	0.0056055	0.056771	0.012306	0.0076595	0.0069555	0.105665	0.010154	0.0317865	0.0022585	0.005161	0.0133345	0.0056765	0.0217435	0.0206335	0.0011115	0.0142445	0.000971	-0.0016025	0.000913	0.001289
entA-var3_11	-0.0009155	0.013775	0.827868	0.029464	-0.0001775	0.0002685	0.0021745	0.718166	0.002205	0.0022905	0.0030735	0.011347	-0.001551	0.0213515	-0.004398	0.005963	0.007462	0.002061	-0.002598	0.0086835	0.0003215	0.006918	0.0055505	0.0045625	0.0073625	9.8e-05	0.0036705	0.0083815	0.0032545	0.0016115	0.000859	0.0087215	0.0023285	-0.0004255	0.009853	0.0053705	0.004789	0.006859	0.003086	0.000487	0.004388	0.0212065	0.001071	0.0016	0.01226	0.002072	0.019375	0.0110305	0.00207
entB_11	0.017313	-0.0018705	-0.001882	0.0658995	-0.0007425	-0.000476	-0.000681	0.0060875	-0.000601	0.754746	0.002683	0.0075045	0.784689	0.0135425	-0.0040115	0.0079155	0.000225	-0.005804	-0.0020335	-0.003038	0.0057495	0.744749	0.092634	0.0084085	0.013323	0.506189	0.692713	0.732078	0.691108	0.60771	0.101756	0.790797	0.178492	0.703205	0.594167	0.684448	0.611642	0.683318	0.007248	0.728222	0.430187	0.0203055	0.738668	0.733626	0.0112725	0.0037685	0.000433	0.005568	0.0042975
entD_11	0.00497	-0.002314	0.0015855	0.077035	0.0043465	0.000275	0.00359	0.725839	0.007631	-0.002083	-0.0044035	0.004966	-0.001233	0.0064665	0.0032195	0.0070085	0.004388	-0.0009565	-0.00155	0.001204	0.0037645	0.0060025	0.27152	0.00455	0.0617415	-0.003287	0.0176535	0.234962	0.177506	0.0041185	0.214844	0.074607	0.001921	0.017553	0.314014	0.0429235	0.114039	0.007772	0.010253	0.0485855	0.0032815	0.0190215	0.0400735	0.008694	0.0087695	0.0034015	0.000753	-0.0056395	0.0007395
entE_11	0.0084145	0.0006745	0.0041835	0.0321565	0.0017625	0.0014305	-0.0010895	0.0073905	0.001867	0.000357	0.00075	0.0057915	0.001429	0.000458	0.002129	-0.0016535	-0.0015085	0.00106	0.044537	0.0065635	0.00413	0.00132	0.003933	0.007447	-0.0008505	-0.005195	-0.000925	0.01148	0.002182	-0.0001215	-0.0031775	0.0045595	0.0001215	-0.000307	0.017802	0.0022785	-0.0001085	-0.000642	0.0009285	0.002383	0.0028675	0.0198435	0.001434	0.000615	0.005693	0.0016675	0.005864	0.00402	0.004958
entG_11	0.799727	0.0032465	0.833321	0.842813	0.83007	0.0010215	0.0011965	0.734832	0.708557	-0.001765	-0.0001125	0.704483	-0.0031125	0.737457	0.787288	0.01305	0.0011735	-0.0041305	0.0093845	0.0167765	0.766126	0.73696	0.671393	0.750316	0.810376	0.558496	0.748227	0.785819	0.730298	0.709494	0.811908	0.808283	0.486965	0.80609	0.657746	0.720042	0.649616	0.752271	0.805093	0.798609	0.769208	0.702743	0.845881	0.827498	0.733007	0.805885	0.78452	0.780265	-0.001615
entH_11	0.0007425	0.004327	0.0020125	0.039936	0.001006	0.847172	0.001946	0.00012	0.0024435	-0.000869	0.0051135	0.017972	-0.000146	0.013843	-0.00234	-0.0029765	0.002756	-0.0042065	-0.007268	0.716903	0.001392	0.001034	0.0449215	0.006031	0.00534	-0.001417	0.004721	0.0437745	0.0955595	-0.0017575	0.023568	0.0097535	0.0003565	0.0079905	0.101399	0.0092525	0.0102535	0.0042115	0.004064	0.005563	0.0027425	0.0236675	0.014092	0.009049	0.0145245	0.0077235	0.005102	0.000829	0.0018745
entI_11	0.816815	0.0067165	0.836813	0.842896	0.837578	0.010077	-0.0040705	0.714396	0.709784	-0.003319	-0.0018115	0.701471	0.001971	0.754045	0.783135	0.008399	-0.000231	-0.0036625	0.0037985	0.005788	0.772371	0.757335	0.655439	0.65244	0.658295	0.148346	0.636682	0.783	0.64176	0.494229	0.0762185	0.713504	0.232119	0.694715	0.547123	0.660181	0.603395	0.594336	0.015287	0.765446	0.437692	0.629576	0.774894	0.755715	0.732071	0.818328	0.798231	0.797921	0.0014445
entJ_11	0.008468	0.0194495	0.0180225	0.0008065	0.019095	0.0220375	0.0001115	0.714294	-0.005262	-0.0045295	0.001621	0.0025765	0.0099	7.65e-05	-0.001539	-0.001725	0.0028605	0.006787	-0.004987	-0.006257	0.00282	0.019568	0.0091965	0.0025655	-0.0010225	-0.000467	0.007393	0.012717	0.029705	0.0488735	0.0076215	0.000474	0.0176915	0.0047	0.0104775	0.0044095	0.007815	-0.000833	-0.0012695	0.0067225	0.003944	0.015793	0.0130865	0.0022905	0.012039	0.0095945	-0.001704	0.00164	0.0081965
entL_11	0.782973	0.000246	0.798917	0.821398	0.0160225	-0.0024175	0.000272	-0.000503	0.706308	0.0056525	0.832583	0.0015025	-0.00171	0.000857	0.753358	0.008278	-0.003205	0.004588	0.0258445	0.607124	0.772151	0.0016735	-0.001224	0.0045275	-0.0001485	-0.0002335	0.0005085	0.0074925	0.0080485	-0.0013775	0.002289	-0.001216	-0.0012135	-0.000168	0.0043885	0.0027695	0.0004345	-0.003301	-0.00053	-0.001601	-0.000408	0.0135635	-0.001662	0.001331	0.0023965	0.787516	0.0073645	0.0028045	0.001716
entM_11	0.775588	0.0003965	0.825367	0.693974	0.841853	-0.00172	-2.1e-05	0.717512	0.68564	-0.0015265	0.003141	0.716868	-0.000656	0.684497	0.374668	0.007746	-0.0028495	-0.0032855	0.001355	0.003088	0.74669	0.721475	0.661052	0.722087	0.802314	0.710409	0.718757	0.760512	0.73307	0.698553	0.789103	0.791	0.671613	0.775989	0.640931	0.691258	0.599926	0.697461	0.774397	0.766609	0.74494	0.687785	0.839537	0.815867	0.727345	0.795364	0.730945	0.720648	0.0012845
entN_11	0.717647	0.006801	0.797089	0.396964	0.810282	0.0051205	0.001895	0.711006	0.68614	0.003207	-0.0043705	0.69946	-0.000175	0.707586	0.203657	-0.002044	-0.0027145	0.001989	-0.000781	-0.0016215	0.764958	0.751513	0.630912	0.720832	0.789322	0.391007	0.718967	0.764742	0.719278	0.642613	0.76679	0.778356	0.353459	0.766315	0.6021	0.704572	0.610292	0.70402	0.715498	0.755715	0.687564	0.699302	0.82402	0.813376	0.749663	0.712537	0.763375	0.756928	0.0013345
entO_11	0.72263	0.024299	0.814312	0.810407	0.818469	0.0003265	0.0002465	0.6816	0.729226	1.95e-05	0.0039195	0.696052	-0.002726	0.737963	0.713386	0.0027495	-0.003273	0.01044	0.004327	0.005458	0.781176	0.76972	0.668221	0.730226	0.782075	0.443902	0.73559	0.785447	0.714223	0.652066	0.761364	0.782192	0.260534	0.77279	0.650483	0.734166	0.635309	0.731472	0.664488	0.766714	0.668304	0.71234	0.815756	0.799755	0.762382	0.813569	0.78543	0.794305	0.003212
entR_11	0.0024065	0.003843	-0.002101	-0.005206	-0.001608	-9.15e-05	0.001234	0.707795	0.004515	0.0014575	0.0420085	0.006407	-0.003589	0.00093	-0.0027125	0.005153	0.0010365	-0.002596	-0.0033505	0.002265	-0.001801	0.0010895	0.001162	0.000207	0.001886	-0.0010005	0.0021995	0.0158275	0.028748	0.0028445	-0.003225	0.000717	-0.002451	0.001391	0.0101345	0.006131	0.005363	-0.002578	0.000325	0.0055665	0.0043735	0.0698135	-0.0007505	0.000937	0.0086145	-0.0033305	-0.000918	-0.001767	0.003061
ermA-9,4	0.778714	0.013224	0.829336	0.0067865	0.829977	0.0279595	-0.0025135	0.0021755	0.001603	-0.0041285	-0.002349	0.000633	0.0145505	0.0075395	0.0002295	0.69616	0.0005255	0.0047235	0.00773	0.005694	0.0001515	0.0045985	0.001771	0.0052805	0.005813	0.0072825	0.002758	0.003581	0.012642	-0.0019925	0.0006395	-0.0085165	-0.0014825	-0.000321	0.001567	0.0005055	0.0021275	-0.001835	0.0011005	0.004273	0.0062135	0.0215715	0.0142455	0.0002195	0.011291	0.001801	-0.000508	-0.00102	0.005694
ermC-8,1	0.0060355	0.0009715	-0.0054235	0.0044465	0.000995	0.0192005	-0.0057425	0.726016	-0.003228	-0.0019945	-0.0020185	0.0043075	-0.001565	0.0288885	0.000268	0.0006365	-0.0016935	-0.0032085	0.704362	0.004432	-0.0082855	0.0128285	0.006224	0.008845	0.007225	0.0035405	0.008857	0.0208655	0.0121745	-0.0011195	0.0207925	0.0204185	-0.0009775	0.0092785	0.009246	0.732499	0.0081985	0.705086	0.0014335	0.007024	0.005064	0.030381	0.0085695	0.803888	0.0219415	0.009292	0.007745	0.003434	0.003448
ermC-8,2	0.0169145	0.010466	0.049434	0.010566	0.007149	0.005526	0.0005235	0.735389	0.002129	-0.0004715	-9.05e-05	0.0046695	-0.0009045	0.023806	-0.0004345	0.000589	0.012788	-0.0031505	0.727736	0.0031575	0.083077	0.0085125	0.0082925	0.01124	0.0063835	0.001782	0.0073575	0.0201055	0.005805	0.005623	0.017917	0.0698325	0.0012295	0.009253	0.0082285	0.710726	0.013559	0.689976	0.0032325	0.0113165	0.004069	0.033136	0.007485	0.796616	0.0185275	0.0026705	0.009586	0.000149	0.0059555
etD_11	0.0013785	-0.0015075	0.00014	0.0302975	-0.0017785	-0.0001555	0.000911	-0.001741	0.007359	-0.0046265	-0.00095	0.0109615	-0.006037	0.02084	-6.3e-05	0.0048085	0.0015775	0.001237	0.0034005	0.005459	0.0073915	0.0005865	0.0050015	0.0047595	0.000624	-0.0103785	0.002479	0.021823	0.004195	0.0007	0.006522	0.0062135	0.0017885	0.0046035	0.0170675	0.002909	0.005013	-0.000916	0.0012045	0.0168055	-0.001493	0.010347	0.0069025	0.0022985	0.007433	0.0053345	0.00554	-0.0010635	0.0030095
far1_10	0.0051435	0.0024755	0.000529	0.001144	0.001267	0.0084405	0.0061405	0.00358	0.015234	0.0076035	0.0045565	0.006458	0.00224	0.0303025	0.001209	0.0086485	0.001175	0.011924	-0.0036395	0.0085025	-0.000963	0.028355	0.0025195	0.00012	0.0191905	0.003326	0.029584	-0.000881	-0.0019065	-0.0024745	0.0023665	0.023986	0.003951	-0.000698	-0.002751	-0.0011705	-0.000161	-0.002978	-0.0020815	-0.0015505	0.003493	0.013657	-0.0014185	-0.0015225	0.0085415	0.0129465	0.0368055	0.040391	0.001268
gapA_11	0.807123	0.001141	0.826105	0.821863	0.827902	0.828375	0.828499	0.736809	0.700353	0.808198	0.817741	0.664036	0.798071	0.729774	0.776399	0.0048185	0.604478	0.661067	0.726808	0.668177	0.763399	0.738929	0.680036	0.739197	0.780176	0.596839	0.719652	0.756217	0.748581	0.696405	0.786739	0.781889	0.559106	0.772523	0.652139	0.693802	0.607166	0.702702	0.740648	0.760956	0.716646	0.713348	0.813895	0.792378	0.728796	0.771241	0.742051	0.776304	0.805848
hl-III_11	0.78753	0.047777	0.815155	0.0389425	0.813988	0.83271	0.821603	0.696295	0.006354	0.78828	0.006164	0.0093945	0.005356	0.709425	0.0034165	0.000876	0.528404	0.565864	0.664752	0.665821	0.755165	0.746474	-0.001233	0.0017495	0.0016495	-0.001767	0.001816	0.015608	0.0303785	0.0012735	0.0031165	0.007559	-0.0012615	0.003384	0.00984	0.0034665	-0.0001125	0.0014775	-0.0009725	0.0150985	0.003059	0.0092545	0.0055	0.000646	0.00617	0.002646	0.00788	-0.0013445	0.0017405
hl_11	0.793439	0.003126	0.817987	0.809937	0.819672	0.831121	0.82719	0.719437	0.68993	0.767256	0.82302	0.661987	0.793542	0.726484	0.767315	0.0107195	0.62481	0.718	0.75751	0.75221	0.763995	0.740645	0.649178	0.719998	0.784123	0.549637	0.691068	0.716705	0.717307	0.660214	0.778482	0.736348	0.531991	0.741561	0.565715	0.65715	0.566636	0.680756	0.745116	0.727506	0.702021	0.713928	0.784031	0.776636	0.724577	0.786776	0.782415	0.777413	0.00185
hla_11	0.757373	0.0083905	0.818381	0.801804	0.814693	0.829466	0.817878	0.710547	0.707584	0.727811	0.802273	0.672084	0.783274	0.700649	0.673768	0.0011205	0.518586	0.585354	0.525194	0.346779	0.765998	0.736935	0.639441	0.730737	0.791496	0.491927	0.708155	0.716727	0.674594	0.633261	0.762739	0.785977	0.402353	0.736873	0.516239	0.671794	0.591153	0.694287	0.702427	0.71327	0.651598	0.715463	0.778566	0.785156	0.7338	0.770653	0.763904	0.757308	0.807667
hlb_11	0.0106655	0.007969	0.0663915	0.776273	0.106185	0.51832	0.460245	0.017563	0.704357	0.766074	0.77213	0.684978	0.816446	0.68623	0.676306	0.0047285	0.0410745	0.000179	0.0426015	0.13114	0.127836	0.0626115	0.0511875	0.0291295	0.0325205	-0.0004345	0.0401225	0.128191	0.0966245	0.0857445	0.047041	0.0525785	0.0038515	0.108954	0.0300755	0.038459	0.0517545	0.0369175	0.0122495	0.147197	0.029533	0.143267	0.056757	0.0781045	0.186318	0.76456	0.733837	0.71979	0.801412
hlb_12	0.0046865	0.0216405	0.0637425	0.672782	0.106508	0.535845	0.481167	0.019463	0.695481	0.775291	0.716531	0.702754	0.826393	0.657176	0.570816	0.0031505	0.0294025	0.00553	0.041622	0.117643	0.144267	0.062744	0.056273	0.0309375	0.0228685	-0.005377	0.030786	0.118869	0.0505095	0.0883005	0.0547785	0.040733	-0.002043	0.10774	0.029378	0.033217	0.038336	0.037615	0.0137655	0.15898	0.0326395	0.155374	0.050649	0.070778	0.188599	0.758638	0.726776	0.727948	0.792949
hld_11	0.806507	0.0243595	0.826317	0.82064	0.831732	0.837717	0.832464	0.726939	0.693294	0.765802	0.83386	0.67637	0.829962	0.69331	0.740288	0.0028165	0.649617	0.644621	0.641475	0.569719	0.756741	0.751062	0.694788	0.76245	0.819527	0.571948	0.75773	0.778153	0.74633	0.713005	0.791016	0.82098	0.351877	0.799326	0.666701	0.70534	0.624771	0.751965	0.770576	0.778035	0.739013	0.726669	0.834302	0.825365	0.737117	0.787068	0.772435	0.780352	0.818284
hlgA_11	0.798127	0.011163	0.820869	0.824002	0.783798	0.8259	0.814933	0.670198	0.72809	0.786374	0.814009	0.707916	0.800458	0.741988	0.721383	0.0087075	0.518428	0.600402	0.524567	0.382097	0.772148	0.767835	0.681488	0.717813	0.764848	0.418224	0.691236	0.756019	0.715238	0.643674	0.759405	0.780113	0.348279	0.740948	0.616775	0.707853	0.609717	0.72128	0.676754	0.739688	0.6546	0.725614	0.803748	0.780164	0.7383	0.809641	0.797044	0.802223	0.741505
hp_Q2FXC0_611	0.001286	0.007999	7.5e-05	-0.0054505	-0.0034475	0.838709	0.843075	-0.00205	0.0023185	0.801903	-0.0026525	0.0005095	0.0086285	-0.0044475	-0.003582	0.003246	0.577045	0.588676	0.654027	0.536029	-0.0041365	0.0005385	0.006525	0.018029	-0.0010825	-0.0017005	0.008952	-0.0010915	-0.006713	-0.003026	-0.003061	-4.7e-05	-0.0040475	-0.00644	0.0032125	-0.0009605	-0.0005985	-0.0015255	0.0023585	-0.000962	-0.0033845	0.0180945	5.05e-05	0.003687	0.0016555	-0.0015755	-0.0007875	-0.002158	-0.00454
hp_Q2YUB3_611	0.031661	0.0401595	0.0666655	0.853128	0.061769	0.155999	0.107926	0.013857	0.723888	0.040853	0.04913	0.710458	0.062312	0.319839	0.778083	0.0031835	0.007482	-0.007556	-0.0055775	0.0043165	0.103622	0.102025	0.575724	0.279276	0.181197	0.013134	0.15677	0.646067	0.420219	0.297681	0.482323	0.341755	0.054377	0.410408	0.542708	0.487211	0.464933	0.224173	0.229689	0.499644	0.0800285	0.284138	0.434139	0.296458	0.278264	0.799375	0.766366	0.765918	0.032652
hp_Q6GD50_611	0.006749	0.0044455	0.0009205	0.017332	0.0168585	0.830653	0.0090865	-0.002132	0.002976	0.0029635	-0.0001405	0.017162	0.0032845	0.0021025	0.0043175	0.003329	-0.001646	-0.023877	0.000923	0.0013085	0.0023955	-0.006069	0.002401	-0.0010715	-0.0011425	-1.9e-05	-0.000656	-0.0027655	0.00719	0.00458	-0.0009865	0.0042345	-0.002994	-0.00146	-0.0007375	-0.003828	-0.002779	0.000295	-0.0010795	-0.000762	-0.0024275	0.0089775	0.001549	0.002079	0.005397	0.02726	0.0076095	0.0137565	0.007037
hp_Q7A4X2_611	0.807907	-0.0067055	0.824005	0.833914	0.827647	0.07692	-0.000496	0.733289	0.72487	0.0019405	0.835805	0.684551	0.00143	0.692771	0.772588	0.0039765	-0.003764	-0.007062	-0.0041685	-0.0072205	0.770197	0.71821	0.68613	0.730055	0.802037	0.58022	0.726337	0.776336	0.715016	0.683029	0.771595	0.804881	0.433518	0.767959	0.634578	0.698923	0.610286	0.713986	0.736078	0.756363	0.707766	0.70269	0.819827	0.812955	0.727798	0.794887	0.788597	0.787771	0.001915
hp_Q9XB68_611	0.750801	0.00245	0.814289	0.0233355	0.817481	0.074832	0.0009585	0.703616	0.001384	0.791976	-0.0027585	0.0133275	0.801073	0.003939	0.0089605	0.193265	0.170743	0.007737	0.229595	0.373284	-0.0004115	0.736685	0.0276635	-0.0014215	0.0014195	0.0005215	0.0040275	0.018428	0.0264125	5.1e-05	0.008704	0.0033425	-0.0017315	-0.0026575	0.024135	0.0032965	0.01367	0.0023275	0.0001665	0.0027165	0.0014125	0.014143	0.0055575	0.0002155	0.0128425	0.001127	0.0020255	0.0026665	0.0021085
hp_arcA_611	0.0065525	0.861654	0.0015715	0.0383465	-0.0003925	0.0203925	0.0025995	0.0470205	-0.0005425	0.006474	-0.0030225	0.0033145	0.003691	0.0002	-0.001185	0.0059485	0.538722	0.002013	0.679873	0.0039785	-0.003299	0.012531	0.0022835	0.001565	-0.001388	0.011798	0.001165	0.0056615	0.003999	-0.00164	-0.002352	0.0030935	0.0024465	0.001726	0.0031345	-0.001117	0.0002635	-0.001942	0.000415	0.0018405	0.001993	-0.0328915	0.0049565	0.0009725	0.014875	0.003753	0.0013095	0.000998	0.0028305
hp_arcB_611	-0.0001325	0.862086	-0.001806	0.0902945	0.0038925	0.028665	0.0073505	0.011633	0.047412	-0.0034005	-0.001599	0.011126	-0.002587	0.008504	0.0014145	0.0045055	0.657446	-0.032016	0.738099	0.0007305	0.00023	0.002314	0.034368	0.002057	0.004637	0.007532	0.006436	0.038785	0.057969	-0.001141	0.0334005	0.0086975	0.002734	0.0130685	0.0636485	0.006176	0.0103945	-0.000185	0.0019255	0.012505	0.0074105	0.0179025	0.029025	0.0024685	0.0103925	0.003136	-0.0022225	0.002175	0.0057485
hp_arcC_611	0.002665	0.854906	-0.001944	0.013565	-0.004367	-0.0020975	0.002832	0.0033495	0.0067475	-0.0031365	-0.0016425	0.017001	0.003527	0.0060255	-0.0024585	0.00586	0.365775	-0.005852	0.534182	0.0118715	0.0010255	0.003425	-0.000308	0.0015145	-0.0034755	0.0026085	0.000213	0.004535	8.05e-05	0.00099	-0.003918	-0.0013365	0.006004	0.0056175	0.008577	-0.0002645	0.0018775	-0.000981	-0.002174	4.9e-05	-0.002146	0.0072295	0.002441	-0.00059	0.0156565	0.002688	0.0067685	-0.0017455	0.0016975
hp_arcD_611	0.002739	0.860496	0.030934	0.098636	0.016521	0.000981	0.0087505	0.0108715	0.0083375	0.0078185	0.003221	0.008214	-0.0008885	-0.000948	-0.0039165	0.005061	0.607166	-0.015368	0.74621	0.002583	-0.0001915	-0.0004025	0	0.003941	0.02776	0.004986	-0.0030905	0.201445	0.170793	0.0032655	0.150441	0.0211955	0.017707	-0.001604	0.440406	0.0078765	0.0815355	-0.0001345	-0.000725	0.005347	0.003782	0.013442	0.0110015	-0.000899	0.010125	-0.00021	0.005703	0.0055835	6.15e-05
hp_aur_611	0.786214	0.00295	0.813603	0.839267	-0.0010125	0.837153	0.812642	0.717701	0.706809	0.771921	0.824815	0.677037	0.178055	0.680656	0.77171	0.009068	0.573184	0.374455	0.715917	0.723237	0.743458	0.747992	0.663887	0.747701	0.784911	0.597813	0.710269	0.772568	0.72999	0.655271	0.764289	0.762553	0.291886	0.761285	0.636474	0.706224	0.629865	0.706052	0.755775	0.774756	0.715398	0.701125	0.807488	0.807403	0.726704	0.780536	0.771202	0.745368	0.814501
hp_aur_612	0.0034845	-0.0028765	0.0032075	0.0040885	0.828449	0.013928	0.0011365	0.049007	0.028007	-0.000883	0.006686	0.053004	-0.001974	0.023059	0.0002025	0.0107225	-0.0048695	0.050889	0.007198	0.0044285	0.017214	0.012425	-0.0031305	0.0103725	0.0013705	-0.006106	0.013577	0.0286865	0.039569	0.00268	0.010626	-8.4e-05	0.0052325	0.024421	0.000158	0.002277	-0.0009615	-0.0027245	0.0044885	0.0422985	0.010429	0.0538145	0.0233925	0.035239	0.0327005	0.0289705	0.024703	0.0292175	0.0149935
hp_aur_613	0.793146	0.0071645	0.820237	0.831533	0.829503	0.821983	0.816861	0.718492	0.694076	0.777649	0.808703	0.654233	0.792993	0.676662	0.766074	0.0077795	0.449036	0.265707	0.694591	0.615119	0.769776	0.72093	0.541331	0.665178	0.781564	0.518398	0.643502	0.67544	0.621823	0.416726	0.613723	0.647662	0.333311	0.703418	0.532623	0.618714	0.56809	0.439515	0.721221	0.711303	0.690593	0.695097	0.740875	0.746081	0.672819	0.753787	0.761738	0.716842	0.828237
hp_bap_611	0.004736	-0.0031825	-0.0012475	-0.006674	0.0031505	0.000446	-0.002295	0.001999	-0.002012	0.004937	0.0065185	0.0191175	0.0018575	0.018158	0.001171	0.026177	0.0003955	-0.004107	0.002254	0.003327	-0.003111	0.013472	0.0032195	0.0003245	0.0009715	-0.0011635	0.0037895	0.0022015	0.0014785	-0.0003285	-0.0020285	0.00978	-0.000698	-0.000664	0.0039165	0.0012785	0.000921	0.0007965	0.0046895	0.005719	-0.0001565	0.0152475	0.007796	0.0035605	0.004034	0.006064	0.004143	0.0030105	0.0001
hp_bbp_611	0.009082	0.173127	0.0929495	0.0342465	0.075978	0.109996	0.086066	0.002909	0.0371565	0.152081	0.08776	0.04062	0.0266665	0.118352	-0.0007315	0.0084265	-0.0009025	-0.011559	0.0061075	0.012939	0.0263785	0.0433045	0.389804	0.118557	0.0977135	0.0112875	0.12283	0.468578	0.199481	0.18155	0.263818	0.218687	0.049856	0.202404	0.471934	0.329929	0.356804	0.199953	0.072908	0.39385	0.063306	0.152963	0.177839	0.179915	0.127097	0.0397615	0.0046425	0.003943	0.022234
hp_bbp_612	0.002875	0.000593	-0.000345	0.831401	0.0044885	0.0497615	0.0037725	-0.0035505	0.689693	0.0948505	0.004462	0.648392	0.001467	0.0110455	0.764353	0.0080285	0.0038455	-0.007684	0.0106275	-0.002401	0.008703	0.0035345	0.0394065	0.008624	0.0021975	-0.0003545	0.0027415	0.043987	0.163454	0.007653	0.031735	0.0302545	0.0018245	-0.000242	0.072451	0.0164565	0.030478	0.010926	0.0012875	0.051482	0.003446	0.014965	0.114164	0.009969	0.016944	0.728325	0.0346085	0.056203	-0.003493
hp_bbp_613	0.0012825	0.0172675	0.0009135	0.12168	0.814121	0.004273	0.002896	0.00769	0.265301	0.003684	-0.000439	0.405523	-0.0054685	0.0036515	0.040529	0.007495	-0.0001335	-0.010229	0.025748	0.001224	0.005109	-0.0013765	0.557945	0.705237	0.784174	0.520925	0.70409	0.692062	0.697286	0.637447	0.735474	0.771585	0.457064	0.0010805	0.608615	0.615722	0.561972	0.658597	0.724946	0.710929	0.698417	0.659869	0.769234	0.779539	0.681095	0.434805	0.00479	0.0067985	0.005402
hp_bbp_614	0.816512	-0.001229	0.827023	0.836019	0.820793	0.831211	0.067483	0.72234	0.707631	0.768798	0.835189	0.675663	0.830642	0.740595	0.759041	0.0047115	0.629967	0.639247	0.735868	0.682652	0.787416	0.0056105	0.710001	0.707614	0.759503	0.543134	0.720745	0.731103	0.559177	0.637849	0.752186	0.776976	0.431793	3.4e-05	0.610739	0.647552	0.588834	0.681728	0.687372	0.73642	0.679958	0.673333	0.782692	0.787705	0.713601	0.770365	0.762717	0.745885	0.825966
hp_bbp_616	0.0245465	0.0081665	0.0884395	0.052087	0.11654	0.843678	0.0044735	0.0747785	0.125184	0.814007	0.034868	0.238357	0.075713	0.178197	0.008051	0.010689	0.636127	0.596436	0.714037	0.72499	0.101822	0.0015045	0.245409	0.146852	0.0911205	0.0233825	0.096691	0.245984	0.180838	0.082653	0.386883	0.206357	0.0322265	0.0030105	0.138346	0.135147	0.142772	0.0598825	0.124551	0.427048	0.0318155	0.140492	0.313534	0.165765	0.0896465	0.398724	0.073511	0.118885	0.821394
hp_bbp_617	0.826304	-0.004425	0.829163	-0.001764	0.003175	0.332947	-0.0013335	0.718571	0.004699	0.363181	0.18845	0.0029235	0.051279	0.710728	0.004471	0.00429	0.0081985	0.001893	0.006	0.0026105	0.765463	6.9e-05	0.0021375	-0.002228	8.1e-05	-0.001378	0.001174	0.0016805	0.0006865	0.0018125	-0.002427	0.0018365	0.00081	0.0008225	0.000127	0.000732	0.0018385	0.003278	9.25e-05	-0.001584	0.000467	0.0138395	-0.0044185	0.002407	0.0010205	-0.0020085	0.296817	0.431708	0.025175
hp_blaI_611	-0.0001455	0.844567	0.830156	0.0009105	0.831863	0.838783	0.001426	0.680434	0.004003	-0.007026	-0.0011375	0.003473	0.830717	0.699855	0.0010475	0.754099	0.68292	0.640241	0.001622	0.693429	0.732603	0.714446	0.662044	0.72223	0.810709	0.706217	0.737858	0.757205	0.747457	0.70457	0.782174	0.78884	0.608186	0.778242	0.63217	0.653902	0.596603	0.695398	0.769753	0.769371	0.730286	0.672225	0.822655	0.817035	0.701247	0.0085975	-0.0040945	0.0022345	0.774954
hp_blaR_611	-0.0023125	0.826885	0.833795	-0.0073305	0.834133	0.828882	0.0034135	0.671994	0.0023815	0.0004	-0.000907	0.009397	0.803575	0.703901	0.0002275	0.71543	0.664847	0.642662	-0.0048505	0.6997	0.742042	0.691186	0.664098	0.71943	0.791749	0.649593	0.73608	0.75701	0.725602	0.665119	0.770222	0.803967	0.448276	0.756094	0.620753	0.647425	0.547554	0.652629	0.703761	0.746776	0.70172	0.663494	0.813514	0.816407	0.705522	0.006271	0.007074	0.012389	0.744542
hp_blaR_612	0.0055365	0.827332	0.83872	0.003093	0.829847	0.830653	-0.0043715	0.692705	-0.002941	0.0029345	0.0001205	0.001312	0.81388	0.729422	0.0051475	0.628713	0.672208	0.606238	0.0068435	0.690218	0.779359	0.694535	0.658793	0.686537	0.708889	0.331375	0.671831	0.761286	0.701663	0.576987	0.745009	0.780031	0.350512	0.67569	0.585176	0.626207	0.572909	0.528625	0.588391	0.712502	0.713386	0.681691	0.821613	0.727974	0.651195	0.0015395	0.013992	0.0022745	0.768471
hp_blaZ_611	-0.002178	0.857378	0.835816	0.008617	0.836858	0.835471	0.002379	0.673739	0.000632	-0.001111	0.0043095	0.004528	0.812029	0.646124	-0.004708	0.794218	0.681895	0.73302	0.001964	0.793846	0.739115	0.693256	0.657817	0.717777	0.818548	0.768811	0.714291	0.775705	0.730509	0.721815	0.783769	0.796782	0.569279	0.768329	0.609626	0.666721	0.601152	0.697896	0.754575	0.751218	0.71424	0.689794	0.821743	0.823738	0.716384	0.001748	0.0162075	0.0014885	0.766639
hp_capH1_611	0.001268	0.128277	0.0990005	0.019844	0.0036705	0.174264	-0.0007785	0.018484	0.0006525	-0.000426	-0.002607	0.0021095	0.0764475	0.029872	0.001821	0.006391	0.0209865	0.025752	-0.0005015	0.009453	0.010552	0.0968375	0.0138095	0.028416	0.0045505	0.005237	0.0142915	0.083778	0.22588	0.0219495	0.079549	0.0166635	-0.0025695	0.053921	0.004498	0.013938	0.01892	0.0020725	0.005686	0.0650835	0.0601805	0.112716	0.141671	0.055468	0.0627195	-0.0024815	-0.0013475	-7.95e-05	0.124602
hp_capH5_611	0.81862	-0.0034805	0.836545	0.114338	-0.0002595	0.0351095	0.847887	0.74958	0.003419	0.824764	0.000215	0.0022225	-0.0033445	0.705905	-0.0035065	0.011818	0.661331	0.774641	0.769708	-0.0037915	0.754362	0.013183	0.112698	0.0143845	0.006837	0.000188	0.00829	0.121421	0.128068	0.003057	0.15338	0.0197685	0.0035885	0.045834	0.16086	0.077315	0.040561	0.0122765	0.029112	0.0407705	0.016699	0.039697	0.0583655	0.01634	0.0139535	0.004567	0.0105255	0.001328	0.825188
hp_capH8_611	-0.000503	-0.0017015	0.000984	0.82609	0.83163	0.839004	0.002019	-0.0028575	0.724255	0.001736	0.825761	0.675652	0.807883	0.0062745	0.772039	0.0052795	0.0008885	-0.015634	-0.0026465	0.591791	0.0024615	0.77628	0.702622	0.748131	0.784404	0.324449	0.739279	0.793027	0.67007	0.637938	0.758018	0.77901	0.167841	0.783947	0.639638	0.697077	0.663466	0.691509	0.689457	0.77021	0.71497	0.722326	0.809065	0.804288	0.772725	0.817989	0.809648	0.80855	0.0070505
hp_capI8_612	0.112195	0.236863	0.0576575	0.842823	0.846152	0.84837	0.075683	-0.000586	0.709611	0.44737	0.847159	0.684305	0.833457	0.0010565	0.788765	0.007901	0.000237	0.064643	0.002198	0.599293	0.0082545	0.767487	0.69857	0.760793	0.82809	0.722569	0.760912	0.791763	0.775225	0.722545	0.808596	0.820291	0.567048	0.798628	0.674202	0.725428	0.649684	0.765435	0.789988	0.797152	0.768965	0.728135	0.829941	0.821444	0.746383	0.778558	0.757979	0.747333	0.0027885
hp_capJ1_611	0.0063545	0.0638625	0.0127875	0.137729	0.0628295	0.114229	0.013075	0.0322945	0.0036185	0.246134	0.108481	0.0074645	0.105796	0.202597	0.009074	0.002615	0.0020715	-0.000616	0.0019045	0.0053	0.095521	0.0002485	0.0012715	-0.0022915	0.004895	-0.0034175	-0.0002485	0.002542	0.003815	-0.0007735	-0.001299	0.001383	0.002534	0.0031825	0.0043825	-0.001896	0.0007835	-0.001065	0.00397	0.0038595	0.0018825	0.005634	0.000698	-0.0034425	0.0003115	-0.000196	-0.0005205	0.0013365	0.001673
hp_capJ5_611	0.799801	-0.007189	0.817873	0.0059045	0.0024845	0.0035115	0.824908	0.736937	0.00073	0.787164	-0.0060835	0.003832	-0.001862	0.714851	-0.0021445	-0.002019	0.549829	0.523019	0.66663	0.0005905	0.768502	0.0006365	0.000232	0.003798	-0.0009325	0.006198	-0.00165	0.0023965	-0.0023855	-0.0004135	-0.000138	-0.0007855	3.55e-05	-0.0013825	0.001073	0.0026445	0.0006035	0.0055545	0.0034925	-0.000277	0.0009175	0.006963	-0.0012755	0.0008375	0.009292	0.0021395	0.0020755	0.0071625	0.82275
hp_capJ5_612	0.802344	-0.001884	0.815088	0.022475	0.006508	0.0036785	0.816416	0.73134	0.024178	0.780366	0.0082305	0.028389	0.008025	0.662467	0.0043875	0.001307	0.635585	0.619673	0.698748	0.0006005	0.737186	0.0404645	0.465828	0.03894	0.0890155	-0.001668	0.0450935	0.520741	0.087043	0.0739185	0.099284	0.142131	0.098135	0.096874	0.226967	0.151475	0.21205	0.0393355	0.014965	0.144814	0.020374	0.0891485	0.03608	0.07948	0.0167265	0.0325105	-0.000939	0.004787	0.810458
hp_capJ8_611	0.0003845	-0.001198	0.0060375	0.827798	0.828987	0.835791	0.002304	0.008592	0.678041	0.004047	0.832981	0.655493	0.807588	0.0087675	0.755691	0.0189645	3.75e-05	0.003201	0.023873	0.769476	0.0040345	0.705235	0.648933	0.741966	0.773181	0.748276	0.709964	0.740093	0.773982	0.734377	0.799202	0.787424	0.71846	0.773115	0.616961	0.693234	0.60166	0.710605	0.797948	0.774358	0.73847	0.696435	0.815313	0.815374	0.712493	0.747205	0.739742	0.720462	0.0012935
hp_capK1_611	0.0118675	0.0146055	-0.0003815	0.037458	0.0627295	0.0824515	-0.0033945	0.006337	0.0738275	-0.005348	0.016199	0.138296	0.008336	0.004622	0.0014915	-0.001987	0.006206	-0.00655	0.002944	0.006575	0.000575	0.0627695	0	0.0855945	0.0355495	0.013583	0.0495845	0.270564	0.191714	0.0606725	0.144782	0.0975855	0.011448	0.126176	0.32464	0.097	0.163602	0.0316135	0.025208	0.176488	0.0340305	0.102649	0.131522	0.157819	0.126706	0.192844	0.163057	0.210398	0.001066
hp_capK5_611	0.809124	0.0394195	0.829275	0.002424	0.0232425	0.0948835	0.821389	0.739154	0.0085975	0.773582	-0.000754	0.025053	0.010351	0.707439	0.002897	0.0017505	0.624568	0.6416	0.750787	0.0004945	0.782188	0.040678	0.0174645	0.0161805	0.0049375	0.003128	0.043264	0.104801	0.092939	0.0215435	0.041427	0.0246915	0.003381	0.045903	0.0104665	0.0184615	0.0235165	0.005397	0.0093615	0.06709	0.021463	0.062106	0.0562795	0.0476105	0.037344	0.038818	0.0434895	0.0537545	0.816518
hp_capK8_611	-0.0002955	-0.0055435	0.005045	0.807068	0.823659	0.831674	-0.0024135	0.0015505	0.662001	0.0031325	0.830248	0.643252	0.800444	-0.0030985	0.755292	0.0104825	0.0005215	0.009524	-0.0054225	0.603438	0.0038815	0.748779	0.657026	0.739908	0.799437	0.677771	0.716905	0.727905	0.745796	0.707444	0.785459	0.800713	0.574129	0.791353	0.623911	0.678716	0.591769	0.703812	0.774226	0.752819	0.738173	0.703128	0.813679	0.806432	0.716396	0.701167	0.733111	0.702688	0.002624
hp_capK8_612	0.002305	0.0001275	-0.0007075	0.808673	0.806037	0.824207	0.0003355	0.0020435	0.700172	0.006804	0.802223	0.667671	0.754061	0.006438	0.721838	0.007628	0.00013	-0.012917	0.0038555	0.645834	-9.7e-05	0.744236	0.657439	0.692463	0.741911	0.487415	0.671545	0.717194	0.685057	0.599233	0.715734	0.762578	0.368625	0.756984	0.598658	0.630696	0.585722	0.663693	0.686926	0.727043	0.64849	0.679242	0.763801	0.767637	0.710225	0.733434	0.748471	0.73613	0.0023545
hp_cat_611	0.0035725	-0.000899	0.0018305	-0.013796	0.0045115	-0.006617	-0.002229	-0.001479	0.005928	0.0096225	0.009738	-0.0028255	0.001123	0.0086055	0.001863	0.0015355	-0.0023615	0.014082	-0.000825	0.003852	-0.0033465	-0.0046475	-0.003629	0.001229	0.0029835	-0.001226	-0.0001045	0.0112595	0.0053885	-0.0009825	0.0030175	0.0002045	-0.0030845	0.001975	0.0005795	7.25e-05	-0.000544	-0.0015215	0.0077215	0.004569	0.0035895	0.013996	0.002301	0.0053525	0.0057145	0.005938	0.0027965	0.004603	0.0033155
hp_cat_612	-0.002006	-0.0023995	-0.0016975	-0.002986	-0.0005345	0.001538	0.002915	0.0004885	0.000717	0.0035415	0.0008425	0.0039195	-0.0010605	0.0180855	-0.000189	0.0042205	0.008254	0.00923	-0.0054745	-0.002686	0.0058625	0.0355055	0.036155	0.008079	0.001214	0.0128275	0.0045715	0.0230555	0.045186	0.0029145	0.021912	0.004754	0.000746	0.0020205	0.080838	0.005867	0.0167725	0.0049165	-0.0001855	-0.0025285	0.001672	0.0071865	0.00335	0.001185	0.012021	0.0031065	0.0023475	0.00627	0.0042595
hp_cat_613	0.0040055	-0.00187	-1.1e-05	-0.0049265	0.0005995	0.002371	0.002322	0.004259	0.0017415	-0.0003255	-0.000251	-0.0011475	0.0015295	0.0064325	-0.001374	0.0032615	-0.0010165	-0.00125	0.000359	-0.002516	0.0089215	0.0026845	0.009969	0.002218	0.0035	-0.001126	0.0034225	0.0072175	0.0057595	0.0018105	-0.003472	-0.0029085	0.006423	0.004083	0.0207675	0.001696	0.0035665	0.0025775	-0.003422	-0.0007615	0.000142	0.014054	0.0039525	-0.0014345	0.0162415	-0.002921	0.0007835	0.0039825	0.0007515
hp_cat_615	0.008494	-0.0007425	0.0051645	-0.0031015	-0.002806	-0.0021375	0.0094585	-3.6e-05	0.012538	-0.0028105	-0.002159	-0.0028665	8.55e-05	0.0133425	0.007141	-0.001682	-0.001436	0.013781	-0.0050855	-0.001118	0.00186	0.003801	0.0043275	0.0008705	0.000478	-0.0017455	-0.0027905	0.004591	0.004287	0.0006675	-0.001401	0.001738	-0.0009195	0.000237	0.0052435	-0.004216	-0.00074	-0.0032465	-1e-05	0.0016605	0.0018365	0.0066405	0.00439	0.0008345	-0.002933	0.003848	-0.004184	-0.002249	0.00215
hp_ccrA-1_611	0.0080455	0.000496	-0.0031395	-0.0268935	-0.0012465	0.828521	0.0016655	-0.020174	-0.001871	0.791019	0.005118	0.0006755	-0.013077	0.70506	0.013375	0.0033645	-0.0039575	-0.008368	0.0013965	-0.0024995	-0.0015425	-0.0132325	0.00483	0.000606	0.000163	-0.0005215	-0.0024645	0.0029475	0.0051595	0.001775	-0.0079445	0.001237	0.0001305	0.000425	0.0061775	0.000988	-0.0014045	-0.0014325	-4.35e-05	-0.003032	0.002192	0.014975	0.004621	0.0073465	0.0044	-0.0038935	0.001865	-0.006661	0.001354
hp_ccrA-2_611	0.820083	0.843383	0.831937	-0.003754	0.832904	0.000566	0.000441	0.704049	0.0034465	0.0037225	0.0032365	-0.0004095	0.823036	0.0042405	0.010594	0.720636	0.664588	0.721404	0.761262	0.757403	0.0013745	0.70024	0.002899	-0.003788	-0.0017735	-0.0010865	0.0020775	0.0023745	-0.0001635	-0.0013345	-0.002414	-0.0008765	0.000151	-0.0034605	0.0125525	-0.0038605	0.00344	0.0009125	-0.0014665	-0.00219	-0.004019	0.0109695	-0.001765	-0.0029895	0.004246	0.0001835	0.043587	-0.001975	0.0022395
hp_ccrA-3_611	0.009728	0.0073045	-0.005031	0.0119615	0.0110775	-0.0021265	0.0074255	0.0129405	0.0023855	0.002664	-0.0049495	0.0031455	0.005521	-0.0029645	-0.0046035	0.0002615	0.0043645	0.012489	0.0154835	0.001966	0.001205	0.320392	0.014287	-0.0018365	0.001552	-0.002948	-0.0032075	0.017674	0.0419205	0.000106	0.009418	-0.0001575	-0.001664	0.0027585	0.027351	0.00368	0.0095055	-0.0006215	0.002007	0.002578	-4.35e-05	0.014752	0.015263	0.000619	0.0089335	-0.003052	-0.000612	0.0016985	0.000987
hp_ccrA-4_612	7.4e-05	0.721212	-0.000553	-0.0069585	0.001546	-0.002491	0.005367	-0.00226	-0.000411	-0.003701	-0.0027435	-0.0023105	-0.0004055	0.0057695	0.0031255	0.0001795	0.000453	0.007301	-0.003482	-0.0034975	0.001132	0.008182	0.000469	0.0053155	-0.001457	0.0002545	-0.002068	0.000828	-6.85e-05	-0.0010135	-0.0014455	0.0004715	0.0012355	-6.55e-05	0.005039	0.0006585	-0.0026785	2.3e-05	-0.0024085	-0.0027205	0.0006955	0.0114845	0.00076	0.0001725	0.0098235	0.0030205	0.000635	-0.004146	0.009571
hp_ccrAA_612	0.000209	4.1e-05	-0.0006995	0.0359725	0.002014	0.0004445	8.3e-05	-0.0003045	-0.0010065	0.0011675	0.003976	0.0110875	0.0025335	0.0109755	-0.003489	-0.0025215	0.0062695	0.004413	-0.0392895	0.003252	0.726066	-0.0043095	0.124204	0.0025525	-0.0019705	0.000535	-0.0024795	0.033582	0.0195965	0.0036425	0.0045115	0.0034405	0.0116155	-0.0024415	0.139586	0.0026555	0.0109915	0.001307	0.0031625	-0.0028875	0.0036345	0.0155695	0.002227	0.002047	0.0067385	-0.000352	0.0016925	-0.000305	-0.0010175
hp_ccrAA_613	0.0076885	0.000125	-0.001943	0.050126	-0.0011885	-0.0026115	-0.0011765	0.0251705	-0.0014765	-0.0030125	-0.003919	0.008498	0.03045	-0.001957	-0.0026315	0.002611	0.0034595	-0.00025	-0.0008535	-0.0051335	0.72616	0.004715	0.121433	0.0019555	-0.000243	-0.001846	0.0025075	0.0193125	0.0393915	-0.001142	0.00945	0.003675	0.002745	-0.002388	0.099056	0.0020915	0.0186515	-0.004508	0.000801	0.0017745	0.0250035	0.0169705	-0.0023015	0.0032515	-0.000106	0.0006185	0.0036235	-0.005541	0.000759
hp_ccrB-1_612	0.0584965	-0.0158475	0.104469	0.306078	0.042619	0.824874	0.0803245	0.042808	0.162712	0.801691	0.03381	0.353941	0.105248	0.700263	0.0003365	0.002225	0.008389	0.024603	0.0037695	0.019979	0.124618	0.115344	0.239019	0.045359	0.08538	0.0052525	0.0995705	0.355144	0.209454	0.0765045	0.229058	0.185445	-0.0002145	0.078599	0.310359	0.240536	0.292536	0.0903235	0.026289	0.104057	0.0217605	0.097301	0.0637865	0.078666	0.053481	0.16658	0.020028	0.01213	0.014678
hp_ccrB-1_613	-0.003975	0.004276	-0.000907	-0.0062795	-0.003823	0.839421	0.0022915	0.0034505	-0.002649	0.804043	-0.001398	0.004142	-0.0214945	0.673809	1e-06	0.0031765	0.0037815	-0.000401	-0.002205	-0.0044315	-0.005038	-0.0004945	0.001751	-0.000866	0.000107	-0.0019305	-0.0019175	0.001076	0.00396	-0.003018	-0.0004125	-0.0033405	0.0081675	-0.0018055	0.0069645	0.002384	-0.0033665	-0.0001305	-0.000931	-0.0013965	0.005589	0.0558665	-0.000956	-0.000961	0.011927	-0.0019135	-0.0018465	0.0624365	0.001777
hp_ccrB-2_611	0.816487	0.861772	0.830588	0.034513	0.837799	0.061494	-0.001005	0.747348	0.0044495	0.003942	-0.004519	0.004196	0.828272	0.0185905	0.000952	0.660059	0.613312	0.678707	0.706079	0.680155	0.0016045	0.754053	-0.0005525	0.0014375	0.004697	-0.001939	-0.001054	0.005846	0.005179	-0.0009315	-0.0028105	0.004021	-0.0022	-0.0019265	0.009226	-0.000779	0.002757	0.0001425	0.002101	-0.0002815	0.0026985	0.00316	0.001874	-0.0001575	0.004047	0.004777	-0.001887	0.002834	0.0023285
hp_ccrB-3_611	-0.003264	-0.0006675	-0.00509	0.013156	-0.0001705	0.48146	0.0035225	0.0021765	0.003014	-0.003954	-0.0031895	-0.0008105	0.0027235	0.005601	-6.35e-05	-0.003328	0.002762	0.118738	0.006951	0.0055435	-0.001973	0.007316	0.0107005	0.004829	-0.0016675	0.001113	0.003031	0.0045985	0.0019835	-0.0002405	-0.00318	0.002204	0.0013195	-0.00455	0.008676	-0.0024485	0.000265	-0.002436	-0.0003215	0.0044965	0.0027635	0.0512315	-0.001863	0.001812	0.011132	-0.0052605	-0.000539	0.0002965	0.023965
hp_ccrB-4_611	0.012656	0.86281	0.092631	0.043906	0.105213	0.115549	0.091121	0.006683	0.0002465	0.101583	0.0303015	0.008051	0.0408365	-0.000344	-0.002476	0.003995	-0.002836	0.012733	-0.0018375	-0.002973	0.003554	0.000879	0.0020785	0.0014725	-0.000147	-0.0058895	0.0028345	0.000552	0.0043655	-0.001309	-0.001339	-0.003685	0.0024545	-0.001353	-0.0015065	-0.0014325	0.000224	-0.00021	-0.001186	0.0022865	-0.000417	0.0036635	-0.0018555	0.0023135	-0.000486	-0.0039775	-0.00736	-0.0001495	0.0023615
hp_ccrC_611	-0.0006345	0.0047035	-0.0018395	-0.001669	-0.000184	0.001376	-0.000998	0.0065565	0.002742	-0.0024695	0.0001925	0.001857	0.824793	-0.0006135	0.007806	0.002991	0.0029865	0.00074	-0.003593	0.0060155	0.763219	0.0074725	0.018802	0.0001375	0.002458	-0.003386	0.0045715	0.002496	0.00547	0.0004035	0.0024675	0.0206675	0.009145	-0.0026985	0.038682	-0.0017465	0.0017395	-0.000578	-0.000117	-0.0011635	0.001253	0.010707	-0.0013335	0.0021525	0.0075345	0.0015815	0.010487	-0.0010175	0.0019685
hp_cfr_611	0.0009165	0.027901	-0.003292	-0.00878	-0.000397	0.000459	0.001081	0.001247	-0.000183	0.00166	0.010384	0.003732	0.0018935	0.0014385	0.0073325	0.006678	-0.0016295	0.007718	-0.003929	0.0073405	-0.0010895	-0.003185	0.002157	-0.002136	0.001031	-0.0048105	0.000617	0.002769	0.002469	0.007425	0.0053365	0.0083185	0.000127	0.004619	0.0075695	0.003	0.000311	-9.2e-05	-0.001221	-0.006762	0.000629	0.013948	-0.0012015	0.001904	0.0054335	0.0011435	-0.0005045	-0.001924	0.0025945
hp_chp_611	-0.0001705	-0.001768	0.817975	0.004662	0.828263	0.000352	0.821825	0.001365	-3e-05	0.007288	0.002255	0.0036535	0.807694	0.0034835	0.0020255	0.008131	0.59518	0.641735	0.687268	-0.0041365	0.0007205	-0.0013625	0.0054455	0.0026045	-0.0008715	0.001219	0.000217	0.001801	0.0082855	-0.003482	0.014324	0.0014215	0.001534	0.000983	0.0130515	0.0016115	0.003735	0.0040815	0.0027665	0.0026765	-0.0019885	0.0094315	-0.000309	-0.000197	0.002542	-0.002246	0.0050635	0.0037475	0.0013325
hp_chp_612	0.108268	0.015051	0.805371	3.7e-05	0.812768	0.0009685	0.820874	0.024228	0.024305	0.006265	0.0069615	0.065201	0.787961	0.243508	0.000515	0.054038	0.597399	0.661437	0.744044	0.0015725	0.171939	0.0064555	0.005494	9e-05	0.00086	-0.002858	0.0009475	-0.000467	0.0060255	-0.001715	0.004086	-0.0012005	0.0244525	-0.002893	0.006386	0.000974	0.00044	0.002974	-0.0072275	-0.0019235	0.0002585	0.0088235	0.000841	0.000339	0.002691	0.0171905	0.0033245	0.000703	1e-05
hp_clfA_611	0.814038	0.023581	0.823703	0.838823	0.822909	0.83409	0.826195	0.724368	0.680794	0.780429	0.843062	0.661986	0.806301	0.718803	0.767995	0.017838	0.664065	0.704485	0.765981	0.755088	0.76403	0.734592	0.690877	0.738146	0.811835	0.689428	0.74483	0.737351	0.758554	0.701767	0.791416	0.809168	0.662381	0.791123	0.655774	0.690211	0.619054	0.718811	0.7699	0.761526	0.758857	0.692319	0.824803	0.817424	0.735457	0.748368	0.71886	0.71348	0.829958
hp_clfA_612	0.001182	0.006281	0.011364	0.839303	0.78525	0.0432875	0.827902	0.0091085	0.700282	0.748977	0.0183075	0.665254	0.805083	0.022158	0.770258	0.0009725	0.581765	0.652833	0.728683	-0.0040605	0.007985	0.017446	0.0153965	0.0126745	0.0072465	0.002942	0.020748	0.058439	0.0515845	0.0131345	0.0276415	0.012188	-0.001531	0.0323205	0.0235605	0.0119555	0.024158	0.0105135	-0.000753	0.042308	0.0118195	0.0481	0.0279525	0.0345785	0.045426	0.768919	0.0475845	0.0601475	0.816405
hp_clfA_613	0.0037905	0.044129	0.0038865	0.732441	0.823384	0.0209885	0.718833	0.007672	0.641619	0.507305	0.0080705	0.646904	0.650146	0.030507	0.366536	0.0136565	0.046938	0.31025	0.12616	0.0016545	0.0195095	0.02905	0.052103	0.0154955	0.0313925	0.000283	0.0152085	0.14228	0.164987	0.014117	0.101106	0.041766	0.00441	0.0331975	0.084763	0.01434	0.046283	0.0083925	0.0059885	0.052687	0.012898	0.043914	0.0337175	0.029401	0.032414	0.708724	0.081986	0.105099	0.639771
hp_clfA_614	0.785419	0.0053905	0.823668	0.806526	0.0698185	0.830327	0.817669	0.704835	0.692058	0.686153	0.835604	0.66525	0.793334	0.717464	0.665485	0.0048825	0.38597	0.557748	0.549337	0.704739	0.754897	0.730029	0.657901	0.721915	0.783712	0.599695	0.716841	0.742294	0.724251	0.679507	0.781544	0.777728	0.554595	0.764165	0.619305	0.649655	0.573898	0.682767	0.729343	0.749665	0.709744	0.667487	0.801969	0.802979	0.703824	0.738456	0.748139	0.748089	0.779863
hp_clfB_611	0.769915	0.002186	0.825213	0.835476	0.834117	0.838182	0.840899	0.653395	0.686238	0.701534	0.837671	0.68415	0.827659	0.681563	0.729121	0.0193415	0.691267	0.754542	0.78473	0.781969	0.750343	0.661351	0.658432	0.707553	0.776154	0.750278	0.727867	0.729674	0.749793	0.732119	0.788327	0.779254	0.7307	0.765367	0.602062	0.648908	0.556645	0.647383	0.778722	0.764217	0.741175	0.669455	0.819559	0.812975	0.679744	0.740409	0.734693	0.727734	0.7728
hp_clfB_612	0.799249	0.0007595	0.820961	0.0492825	0.0073695	0.039378	0.844256	0.709143	0.0208765	0.765757	0.0351045	0.0464645	0.0016995	0.081277	-0.001244	-0.0018065	0.648569	0.714297	0.700574	0.0165905	0.027705	0.698354	0.0324345	0.0347785	0.009363	0.0056085	0.020766	0.161749	0.0850415	0.05454	0.041874	0.019019	0.002354	0.0826325	0.0467875	0.04779	0.0565935	0.0161365	0.0132485	0.152802	0.0141825	0.0774865	0.077784	0.0984565	0.086242	0.0949925	0.0575175	0.131956	0.0482815
hp_clfB_613	0.0039205	-0.007286	0.0183005	0.817897	0.011257	0.838897	0.0273455	0.0011955	0.730236	0.0194	0.0058055	0.698363	0.817775	0.04121	0.718666	0.0012815	0.0048335	-0.013966	0.003038	0.656577	0.0372715	0.0212695	0.0604075	0.0224485	0.022649	0.002332	0.011221	0.175366	0.097415	0.0152665	0.100993	0.0400595	0.006486	0.033792	0.080866	0.0245535	0.050815	0.009002	0.010064	0.0771635	0.009644	0.0364695	0.026604	0.0315455	0.0280895	0.791399	0.015123	0.0401505	0.816193
hp_clfB_614	0.001265	0.001406	0.0031265	0.84427	0.428452	0.819816	0.0066515	0.0007745	0.701264	0.0007695	0.386436	0.656884	0.834613	0.529756	0.780231	0.00624	0.0043885	-0.004917	-0.0033765	0.561733	0.619059	-0.0007335	0.544761	0.486725	0.386161	0.142602	0.330089	0.679221	0.367836	0.35998	0.573149	0.583045	0.161385	0.503186	0.435825	0.48592	0.506953	0.287162	0.322744	0.681617	0.0395245	0.35329	0.506603	0.44828	0.387509	0.746879	0.515049	0.551642	0.80401
hp_cna_611	0.0042	0.049309	0.007064	0.466222	0.827427	0.824998	0.01684	0.0014045	0.0014795	0.0501165	0.0182365	-0.000408	0.321148	-0.001078	0.0208655	0.0086795	0.0004195	-0.008386	-0.012469	0.652087	0.752331	0.000297	0.677625	0.723778	0.762826	0.55596	0.704624	0.778225	0.721051	0.641792	0.776628	0.785778	0.41525	0.768873	0.613841	0.679272	0.643574	0.696387	0.699629	0.761635	0.676478	0.720933	0.80944	0.784558	0.761137	0.0059775	0.761912	0.778304	0.757185
hp_ebh-3prime_611	0.804412	-0.001588	0.83133	0.837978	0.821781	0.830994	0.836798	0.737465	0.708819	0.786232	0.843768	0.679103	0.818882	0.694338	0.781138	0.0028695	0.632495	0.625999	0.69276	0.673843	0.759824	0.763226	0.656919	0.736797	0.792498	0.589501	0.72382	0.76571	0.723783	0.68999	0.792534	0.789613	0.487806	0.772809	0.617689	0.657362	0.60971	0.70996	0.73711	0.751436	0.743638	0.699356	0.813497	0.805839	0.713319	0.796727	0.777497	0.767854	0.812065
hp_ebpS_611	0.0006465	-0.0027375	0.0076485	0.116171	0.006123	0.0387285	0.01864	0.0027715	0.033079	0.0060055	0.833049	0.0541295	0.002318	0.0494465	-0.0028175	0.0039765	0.0003415	-0.00222	-0.001583	0.008928	0.035337	0.0061885	0.653672	0.651014	0.668709	0.353774	0.600096	0.744045	0.665265	0.596224	0.69346	0.624514	0.187615	0.713377	0.620131	0.641324	0.605727	0.627357	0.556303	0.705178	0.621402	0.705409	0.728363	0.75524	0.703696	0.138678	0.0286905	0.0187465	-0.0018575
hp_ebpS_612	0.784302	0.0012365	0.815065	0.848949	0.814401	0.834928	0.811823	0.689475	0.7121	0.741285	0.005347	0.69235	0.823037	0.736344	0.775027	0.0060835	0.520398	0.427302	0.696544	0.621552	0.783171	0.745232	0.058763	0.0138945	0.0085885	0.0094515	0.0078125	0.057199	0.0503815	0.0252615	0.0343955	0.006022	-0.0008155	0.0250355	0.081762	0.0189075	0.025227	0.0081055	0.0063705	0.0282025	0.007502	0.0382575	0.0394465	0.0263285	0.0249335	0.805511	0.796447	0.788541	0.79454
hp_ebpS_613	-0.0016685	0.0008305	0.0463955	0.0533245	0.00822	0.021091	0.82239	0.006448	0.0249705	0.768074	-0.002138	0.0887115	0.795696	0.044111	0.000247	-0.0008525	0.508748	0.565537	0.459974	0.0059305	0.0350525	0.738847	0.211399	0.142192	0.0738735	0.0374715	0.0908125	0.514701	0.399958	0.0723565	0.244905	0.285652	0.014281	0.151195	0.149023	0.124895	0.257419	0.043084	0.0065885	0.456334	0.026356	0.113537	0.2391	0.178002	0.114793	0.160482	0.025274	0.0995165	-0.000359
hp_ebpS_614	0.811084	0.0293005	0.819676	0.838102	0.826933	0.834131	0.82119	0.704315	0.682633	0.747387	0.839112	0.665976	0.781407	0.688147	0.747405	0.005581	0.619312	0.707109	0.744177	0.747212	0.75561	0.723256	0.622969	0.713097	0.763594	0.628507	0.697921	0.76971	0.708894	0.677126	0.789019	0.792693	0.43138	0.729965	0.615004	0.659046	0.553453	0.68525	0.727858	0.73659	0.697512	0.678277	0.803732	0.80686	0.686265	0.78821	0.761367	0.75534	0.782517
hp_eno_611	0.800717	0.000513	0.814457	0.830801	0.819933	0.821206	0.822371	0.701811	0.660986	0.738106	0.834329	0.655437	0.82413	0.633155	0.730627	0.0060365	0.641406	0.743962	0.756992	0.758202	0.728017	0.712364	0.578423	0.649906	0.747385	0.576688	0.645887	0.712238	0.668139	0.644514	0.741728	0.73815	0.536857	0.693884	0.552793	0.608255	0.50191	0.623673	0.713794	0.686387	0.679905	0.625015	0.776441	0.770896	0.632417	0.745263	0.735469	0.730708	0.782471
hp_entCM14_611	-0.0043035	-0.0032685	0.002606	0.829036	-0.003978	0.0051405	0.002724	0.0007165	0.662353	0.0048165	0.0204165	0.644601	0.0078785	0.039538	0.712951	0.002727	0.0032455	0.009179	0.000902	-0.0001835	0.736223	0.009194	0.585293	0.671955	0.751615	0.615713	0.649814	0.686832	0.702368	0.66471	0.740416	0.755373	0.622572	0.720806	0.534902	0.60977	0.513891	0.638188	0.737716	0.71029	0.706838	0.649025	0.792138	0.772441	0.649544	0.722944	-0.0013955	0.0509535	0.000576
hp_entCM14_612	0.009043	-0.001911	-0.0001645	0.834329	-0.0045455	-0.0023605	-0.0018705	0.0032455	0.669674	-0.002749	0.0005845	0.647651	0.0041245	-0.0015295	0.747178	0.0016375	0.00034	-0.020522	0.000858	-0.000416	0.752222	0.000627	0.61392	0.684152	0.78164	0.653284	0.662087	0.705581	0.719395	0.67542	0.753113	0.765863	0.541807	0.750356	0.572871	0.629495	0.556902	0.663554	0.74286	0.739083	0.726722	0.665788	0.797948	0.786832	0.685987	0.725766	0.0024555	-0.0002985	0.0007805
hp_entK_611	0.002379	0.0019085	-0.0022975	0.0181	0.0040845	0.822725	-0.003122	0.018711	0.027097	0.757458	0.000687	0.0583755	0.806185	0.0059905	0.0178095	0.0025485	0.562331	0.413921	0.268192	0.217719	3.45e-05	-0.000712	0.008763	-0.003995	-0.0018655	-0.002109	-0.004337	-0.0015605	-0.001294	-0.002402	-0.000426	0.005119	0.0014295	0.0009875	0.0134465	-0.0011105	-0.0046545	-0.0006405	0.003355	-0.00304	-0.000181	-0.0004025	-0.0019925	0.001056	0.0018675	0.014858	-0.0006795	-0.0032145	0.0102015
hp_entK_612	-0.0068065	0.0014275	-0.0001855	-0.008982	-0.0010765	0.825513	-0.003606	-0.00392	-0.00018	0.776714	0.0013075	0.005139	0.819124	0.000382	-0.003198	0.001738	0.679407	0.651428	0.629978	0.651301	-0.0059455	-0.0021015	0.039376	0.010139	0.0028275	-0.001105	0.012195	0.052385	0.0154665	0.0258135	0.026943	0.007758	0.0057975	0.026117	0.104547	0.029658	0.0368095	0.0071355	0.002346	0.0195125	0.0125265	0.0286135	0.009171	0.013953	0.015146	0.010692	0.0087495	0.00494	0.002958
hp_entN_611	0.790972	0.031747	0.82204	0.844094	0.830364	-0.0020085	-0.004135	0.724699	0.717744	-0.005434	0.0019375	0.680046	-0.0007805	0.141193	0.765499	0.0027085	-0.004239	-0.00362	-0.0040545	-0.0005325	0.792793	0.762307	0.671494	0.724711	0.788899	0.62364	0.701962	0.743883	0.71445	0.643448	0.760556	0.791193	0.474893	0.760838	0.637168	0.673308	0.611493	0.720093	0.704479	0.728517	0.717724	0.687814	0.797779	0.796241	0.741019	0.791522	0.770261	0.755614	0.0021525
hp_entQ_611	0.010053	-0.002207	0.0035025	0.0001225	0.000405	0.84417	0.000127	0.001595	0.001212	0.789456	-0.002004	0.0222405	0.83678	0.0033375	-0.0054445	0.0038225	0.634928	0.470141	0.598256	0.56975	0.009857	0.0056095	0.0181475	0.006893	0.005836	-0.004103	0.0029125	0.0416815	0.034836	0.0058425	0.019784	0.0059555	0.007789	0.017488	0.019077	0.0073215	0.016777	-0.0027545	0.0024935	0.0265185	0.010432	0.039612	0.018795	0.017007	0.024948	0.014877	0.012732	0.0207525	0.001567
hp_entQ_612	0.003593	0.0011465	0.0003735	-0.0086495	0.0029885	0.838867	0.0022525	-3e-05	0.0065725	0.764089	0.006822	0.0007165	0.836512	0.0035215	0.0088875	0.002345	0.264082	0.028599	0.0541705	0.229157	0.00471	-0.0025585	0.016371	0.002232	0.0033965	3.2e-05	0.0028465	0.0260295	0.0029835	0.0013825	0.013043	0.002668	-0.0038875	0.0094235	0.042513	0.004528	0.007888	-0.0002065	0.001213	0.0064175	0.006606	0.0109945	0.004532	-0.001482	0.001068	0.0009295	0.004793	0.001786	0.0008915
hp_entU_611	0.803796	-0.001727	0.833649	0.844233	0.83027	0.0223415	-0.0012305	0.73389	0.697456	0.0047235	-0.001692	0.693346	0.007334	0.752912	0.753718	0.005226	0.002437	-0.004181	-0.0041555	0.002834	0.773284	0.765694	0.680672	0.747309	0.799481	0.619119	0.741303	0.773119	0.744652	0.717151	0.791848	0.806277	0.565943	0.788366	0.656186	0.701967	0.639266	0.731287	0.771111	0.77625	0.753992	0.678615	0.831185	0.822247	0.720312	0.786353	0.768571	0.74821	0.002207
hp_ermB_611	0.006342	-0.01873	4.5e-05	0.0186035	0.002863	1.8e-05	0.0047465	0.0168515	0.003021	-0.0025065	-0.0007275	0.0101565	-0.008737	0.0042115	0.000418	-0.000615	-0.0018125	0	0.002784	0.00268	-0.021689	0.007092	0.038187	0.005541	0.001419	0.0062425	-0.0033665	0.032519	0.0511215	0.003889	0.0401915	0.0089315	0.001821	0.0052405	0.0933625	0.012038	0.01392	0.012122	0.0035755	0.005766	0.002172	0.0222645	0.004427	0.0117895	0.0162055	0.0065425	-0.000698	0.000743	0.0010395
hp_ermB_612	-0.000597	0.00971	-0.004109	-0.004376	0.0041615	-0.0030015	-0.0001415	0.0201065	0.002865	-0.0024275	0.0048515	0.0002055	0.0059165	0.000802	0.0014015	0.0072205	0.0037095	0	-0.004116	-0.002298	-0.022815	-0.0025655	0.001342	0.0058975	-0.001021	0.0065605	-0.001022	-0.00113	-5.55e-05	0.0048525	0.0037265	0.002875	-0.0031525	0.0084725	0.0006515	0.001882	-0.0026605	-0.002656	-0.000872	0.003208	0.0020965	0.0142355	0.0003575	7.2e-05	-0.000541	0.0043705	0.0038715	0.0098505	0.0001715
hp_fexA_611	0.0111965	-0.001429	-0.001183	0.0290095	-0.000965	0.00619	0.0004425	0.0371405	0.0105985	0.000704	0.0028495	0.019745	-0.0062355	0.008116	-0.002431	-0.0004635	0.0087395	-0.002319	0.001442	-0.003025	-0.003482	0.0095765	0.0066405	0.0211265	0.0031335	0.0079055	0.0110715	0.119157	0.0645605	0.018542	0.0392165	0.0103475	0.001734	0.054913	0.016215	0.0098985	0.0159355	0.0112645	0.0056705	0.0753795	0.018399	0.0858105	0.0532525	0.0369715	0.04885	-0.0020635	0.0065975	0.0100525	0.003101
hp_fib_611	0.803625	-0.0017955	0.833341	0.852057	0.0118975	0.841473	0.844084	0.73855	0.705221	0.812863	0.846621	0.701735	0.839355	0.701399	0.76885	0.003352	0.648751	0.700722	0.763241	0.74897	0.794949	0.734601	0.680476	0.733874	0.81116	0.675119	0.757292	0.755375	0.741018	0.733469	0.803449	0.815923	0.657961	0.787468	0.669287	0.70679	0.614675	0.71348	0.786058	0.764158	0.751201	0.695918	0.833584	0.831027	0.724784	0.783835	0.764877	0.731571	0.005961
hp_fib_612	0.008905	0.0106235	0.0444375	0.05792	0.837673	0.162921	0.080199	0.0331075	0.0448735	0.045572	0.0509695	0.0892555	0.0189155	0.07993	-0.0064045	0.003895	0.000599	0.006743	-0.0012215	0.009363	0.105176	0.0463425	0.06252	0.083256	0.0430785	0.0121765	0.045774	0.258986	0.235702	0.0674845	0.440882	0.0789945	0.014555	0.131619	0.0510225	0.082435	0.118191	0.037598	0.028896	0.200954	0.0318945	0.12208	0.168592	0.142846	0.140365	0.118133	0.082933	0.103199	0.001131
hp_fnbA_611	0.804226	0.0020265	0.827806	0.0013045	0.0036255	0.839238	0.0009215	0.739318	-0.0031035	-0.001896	0.0032325	0.0165865	-0.002834	0.002292	-0.0009215	-0.001144	-0.0021115	0.011569	0.0016035	0.538061	0.780975	-0.0008485	0.004632	0.0080895	0.004255	0.024532	0.0047845	0.024985	0.019666	0.007446	0.005424	0.0033085	-0.003777	0.012947	0.0098215	0.0026645	0.0053435	0.0034745	-4.8e-05	0.008561	0.0064805	0.0276565	0.0117595	0.009773	0.0223935	0.0032655	0.016364	0.007499	0.0008845
hp_fnbA_612	0.008801	0.0120135	0.001663	0.0204575	0.005305	0.0048015	0.831512	0.0019645	0.005701	0.811563	-0.0021485	0.007004	-0.001469	-0.0008845	-0.0018085	0.0750465	0.645003	0.594502	0.682759	-0.002146	0.0040445	0.0017765	0.0242005	0.001102	0.0058215	0.0031885	0.003396	0.0360165	0.066561	-0.0004075	0.019889	6.55e-05	0.0011285	-3.8e-05	0.071176	0.001766	0.0125785	-0.000226	-0.0023655	0.0052175	-9.5e-05	0.0253955	0.0051745	0.0060885	0.016336	-0.002782	0.739289	0.737417	0.002636
hp_fnbA_613	-0.001462	0.0118595	0.0016305	0.008405	0.827387	0.0051465	0.0029645	0.008684	0.0011285	0.003591	0.003955	-0.0040155	0.799344	0.639296	-0.0013205	0.0886605	-0.0029695	0.009145	-0.0050535	0.0009855	0.001585	-0.0021385	0.003096	0.001061	-0.0013395	-0.001955	-0.000956	0.005093	0.0057315	-0.003581	-0.0037795	-0.0001	0.0005875	-0.000147	3.7e-05	0.000575	0.002796	0.0007835	0.0001465	0.003476	0.0026015	0.0090965	0.001063	0.000885	0.0136785	0.106763	0.0715945	0.140582	0.0027375
hp_fnbA_614	0.0282995	-0.011821	-0.002918	0.823638	0.036478	0.0066865	-0.0013425	0.0026265	0.648591	0.0003185	-0.0001195	0.620827	0.024056	0.0476745	0.730391	0.003474	-0.000728	0.002429	0.0023715	0.001573	0.00713	-0.0033325	-0.0005	-0.0013385	-0.0017425	-0.0023965	0.0002565	0.0042285	-0.0022935	-0.004227	-0.003751	-0.001505	-0.000619	0.0011135	-0.0004685	-0.002094	0.0021605	0.000629	5.1e-05	0.000308	0.000912	0.0080005	0.000928	9.1e-05	0.001751	0.69001	0.014259	0.00386	0.0003395
hp_fnbA_615	0.787602	0.010851	0.827548	0.827594	0.817366	0.837238	0.833716	0.731818	0.675704	0.783913	0.841894	0.640091	0.827273	0.673504	0.749567	0.003464	0.657967	0.548723	0.651095	0.520395	0.755118	0.726968	0	0.768064	0.821198	0.709707	0.758239	0.774536	0.777721	0.7381	0.817546	0.825003	0.461388	0.804583	0.675139	0.708327	0.62966	0.735883	0.794788	0.800395	0.766993	0.721935	0.830407	0.82876	0.740001	0.739416	0.706603	0.740854	0.820604
hp_fnbB_611	0.745162	0.0434055	0.816649	0.0645975	0.0001525	0.0077075	0.407456	0.718934	0.008842	0.425919	0.010467	0.026535	0.0815685	0.558836	0.00419	0.008461	0.002608	0.065186	0.006089	-0.0008205	0.418256	0.404085	0.0525035	0.008986	0.0097445	0.0025815	0.023612	0.0957865	0.096445	0.0167755	0.0290705	0.029074	0.0065235	0.031168	0.136421	0.010687	0.0204175	-0.0021175	0.0010745	0.052757	0.0119935	0.03808	0.021621	0.036422	0.035034	0.0091365	0.684871	0.726365	0.529764
hp_fnbB_612	0.0339235	0.0027535	0.0389075	0.030352	0.0148645	0.0002935	-0.0020125	0.092752	0.0060135	-0.0003435	-0.0001035	0.011925	0.0075715	0.014897	0.000159	0.004414	-0.0004885	-0.008778	-0.003312	0.007831	0.713485	0.672503	0.006468	0.011435	0.005388	0.0102885	0.0066045	0.0344985	0.019014	0.0079335	0.000924	0.0024575	0.003934	0.012525	0.007394	0.006654	0.0121445	-0.0030645	0.006476	0.018978	0.008934	0.034786	0.0159785	0.010339	0.022395	0.0003345	0.099775	0.170847	0.0046135
hp_fnbB_613	0.002043	-0.000202	-0.003115	0.0332055	0.007385	0.840997	-0.000937	-0.002245	0.0099655	0.0039525	0.0074865	0.0171975	0.0182745	0.0610995	-0.0012155	0.003321	0.000417	-0.017975	0.002757	0.707093	0.010497	0.00148	0.537099	0.073992	0.046728	0.0175405	0.0275255	0.624821	0.352507	0.051374	0.370552	0.33493	0.037342	0.039395	0.5633	0.117933	0.51426	0.004833	0.0069655	0.133528	0.0148845	0.0290215	0.081815	0.091012	0.044159	0.0586175	0.0505455	0.0628875	0.007828
hp_fnbB_614	-0.0071045	-0.0021605	-0.0021875	0.043393	0.00047	0.0227035	0.836282	-0.002115	0.0001375	0.796145	0.00173	0.0017875	-0.003983	-0.0005115	-0.0001655	0.004676	0.657274	0.708267	0.71327	0.0017025	0.001197	0.005578	0.0051785	0.0036435	0.0001885	0.003093	0.0032355	0.0197895	0.0188395	0.000213	-0.00121	0.00263	0.000671	0.003975	0.027395	0.000132	0.0054005	0.0010205	0.000901	0.002533	0.0032945	0.0167905	-0.001871	-0.0026185	0.0124635	-0.0027345	-0.0042475	0.0006365	0.0021545
hp_fnbB_615	-0.0019	0.0017955	0.003719	0.02401	0.0024425	0.003237	0.0165295	0.0004575	-0.00233	0.0041745	0.0237135	0.0009685	-0.005521	-0.003621	0.003724	0.003534	0.004726	0.006553	-0.006596	3.25e-05	0.007266	-0.001063	4.6e-05	-0.0026965	-0.00563	0.0007005	0.000258	-0.0006835	0.0063995	0.0017915	-0.003296	0.0005895	-0.003598	0.001609	0.006212	-0.003522	-0.0001295	-0.004375	-0.0019855	-0.001788	0.004195	0.016115	-9.55e-05	-0.0024295	0.0039855	-0.0007595	0.006024	0.004929	0.0013535
hp_fnbB_616	0.792897	0.0027135	0.813805	0.014452	-0.006239	0.826048	0.818129	0.71777	-0.004263	0.758466	0.0036365	0.001828	0.8171	0.666159	-0.004391	0.0056895	0.6475	0.734956	0.763599	0.603843	0.713091	0.712386	0.605665	0.697542	0.649694	0.533948	0.666517	0.744379	0.678523	0.599064	0.735638	0.769645	0.303873	0.711224	0.614019	0.639993	0.557437	0.003398	0.517408	0.727325	0.497003	0.655269	0.764311	0.765867	0.697765	-0.006158	0.736159	0.707331	0.796611
hp_fosB_611	0.750531	0.0012715	0.807818	-0.003325	0.817883	0.0692175	0.817168	0.690895	-0.0040745	0.747307	0.830041	0.00248	0.013514	0.650316	-0.0018685	0.006655	0.60935	0.681101	0.715183	0.0020565	0.707876	0.70081	0.588252	0.670428	0.757186	0.623951	0.687999	0.687963	0.706039	0.652967	0.748208	0.74669	0.547307	0.717874	0.569254	0.612926	0.519995	0.671666	0.733928	0.705191	0.691915	0.645327	0.7872	0.776298	0.644927	-0.0023115	0.0717025	0.134872	0.0266745
hp_fosB_612	0.017769	0.007153	0.07183	-0.0091285	0.0588265	-0.000202	0.170402	0.0264385	-0.000356	0.0418705	0.040502	-0.0065105	0.008631	0.214523	-0.0061355	0.0039385	0.000887	0.000977	0.013819	-0.001568	0.11774	0.105631	0.318835	0.052208	0.0395315	0.004063	0.0413505	0.319113	0.252847	0.069232	0.208664	0.155652	0.018986	0.118118	0.295979	0.0956905	0.17451	0.02826	0.0273125	0.228497	0.019354	0.068259	0.165584	0.11995	0.0602755	0.0010335	-0.0003075	0.003545	0.0002925
hp_hlIII_611	0.795456	0.019234	0.822295	0.832434	0.830977	0.826255	0.818993	0.695441	0.680076	0.761648	0.82886	0.652107	0.813222	0.694133	0.742817	0.008088	0.61945	0.653964	0.72324	0.694131	0.721227	0.714206	0.583827	0.691218	0.756876	0.63516	0.681871	0.700196	0.696559	0.650678	0.705505	0.764339	0.550428	0.729969	0.537153	0.611784	0.536408	0.63193	0.728622	0.730536	0.706222	0.651919	0.791051	0.762166	0.662233	0.727485	0.728889	0.725316	0.794611
hp_hlb_611	0.602344	-0.0049975	0.74618	0.806315	0.757124	0.800983	0.795532	0.592431	0.697878	0.624298	0.792809	0.661841	0.0892945	0.662602	0.648756	0.001031	0.439771	0.439121	0.49289	0.376444	0.177477	0.684658	0.548721	0.651099	0.723845	0.548089	0.610816	0.699064	0.646543	0.571676	0.720437	0.739319	0.469033	0.689786	0.543362	0.600686	0.525063	0.621674	0.658384	0.703908	0.614566	0.619182	0.770545	0.750063	0.65888	0.76395	0.577209	0.630642	0.065009
hp_hlb_612	0.680402	-0.001079	0.811284	0.821339	0.802277	0.798666	0.801313	0.659698	0.630441	0.6862	0.812702	0.622105	-0.0051275	0.638976	0.679161	0.0032825	0.591519	0.622101	0.66816	0.583726	0.059344	0.653119	0.520966	0.614084	0.721259	0.64047	0.584269	0.643151	0.663229	0.614558	0.722357	0.714758	0.642937	0.686443	0.501848	0.577152	0.497966	0.608931	0.690128	0.672178	0.657961	0.569793	0.770587	0.75585	0.617081	0.70344	0.59317	0.616321	0.115974
hp_hlb_613	0.353201	-0.0031655	0.685971	0.693813	0.690549	0.788478	0.802566	0.493335	0.650753	0.6106	0.718899	0.664001	0.580684	0.656606	0.598901	-0.003949	0.321801	0.528625	0.309182	0.197661	0.507972	0.629591	0.558372	0.621266	0.714422	0.462499	0.595943	0.645847	0.587589	0.53344	0.661422	0.704336	0.432206	0.660815	0.515784	0.60063	0.531299	0.604813	0.607976	0.637376	0.571627	0.600741	0.731343	0.714767	0.644021	0.716528	0.742982	0.718395	0.782918
hp_hsdS-CC15_611	0.044109	0.010943	0.0721905	0.159052	0.138802	0.0570175	0.051391	0.031298	0.17344	0.0062805	0.835566	0.325885	0.167522	0.310688	0.013129	0.0064715	0.001142	-0.000623	0.0023285	-0.0015925	0.112366	0.246447	0.523675	0.222863	0.161137	0.0291685	0.172969	0.545354	0.327253	0.267895	0.327209	0.281017	0.034316	0.272112	0.494947	0.383535	0.425212	0.078528	0.0962885	0.353051	0.101961	0.25168	0.218703	0.203595	0.199619	0.127676	0.0331785	0.093763	0.091826
hp_hsdS-CC25_611	0.784867	0.012564	0.805377	0.794475	0.116246	0.82295	0.831645	0.71069	0.704205	0.729832	0.46153	0.714113	0.0859765	0.136105	0.602484	-0.003792	0.481384	0.721153	0.589813	0.486405	0.124125	0.0010775	0.062846	0.0549755	0.181779	0.011006	0.132601	0.309351	0.204064	0.0195245	0.166048	0.254524	0.0131115	0.0916305	0.046138	0.047164	0.0717135	0.006855	0.0396275	0.194032	0.016778	0.078952	0.213695	0.0760875	0.0053445	0.778572	-0.001353	-0.0025815	0.351766
hp_hsdS-CC25_612	0.783453	0.0199685	0.817968	0.847881	0.797819	0.836852	0.836144	0.729019	0.691996	0.792529	0.182756	0.689185	0.000274	0.106721	0.784048	-0.0156035	0.668078	0.760824	0.744283	0.761225	0.094242	0.003594	0.601945	0.718247	0.775788	0.557517	0.709585	0.755286	0.673188	0.56245	0.749408	0.798099	0.252543	0.753032	0.464696	0.692591	0.650128	0.58701	0.677769	0.745245	0.609995	0.717453	0.785224	0.777232	0.74026	0.764149	0.333421	0.388905	0.688441
hp_hsdS-CC51_611	0.0006865	-0.0016505	0.0333935	0.043576	0.83145	0.180415	0.0788095	0.0046885	0.05583	-0.002839	0.843735	0.113815	0.837843	0.032975	-0.001744	0.000566	0.0002805	0.008617	0.0001925	0.0028075	0.02777	0.011858	0.679863	0.714172	0.800571	0.648435	0.725047	0.737317	0.726494	0.68674	0.76434	0.799524	0.617359	0.772306	0.668424	0.689407	0.613675	0.719545	0.762781	0.752978	0.728703	0.677798	0.817385	0.806806	0.714152	0.11299	0.0054705	0.0083955	0.8305
hp_hsdS-COL-1_611	0.795679	0.0058995	0.826742	0.006221	-0.0010155	0.000929	0.840143	0.748663	0.006814	0.788054	0.0018775	0.012813	0.0043945	0.006165	-0.001049	-0.0017485	0.63063	0.762341	0.707352	-0.0004865	0.005242	0.0021355	0.689685	0.747382	0.808159	0.642135	0.750355	0.770962	0.736291	0.707592	0.791533	0.815622	0.636454	0.796677	0.682735	0.706433	0.636722	0.735738	0.776323	0.785974	0.7412	0.71366	0.828582	0.821787	0.731176	0.0006885	0.780448	0.775044	0.829051
hp_hsdS-COL-2_611	0.009241	0.000491	0.004492	0.851901	0.0014235	0.844529	0.844747	0.007286	0.702805	0.787753	-0.0007455	0.702117	0.009463	0.006007	0.786089	0.0008845	0.657007	0.724554	0.742733	0.669726	0.005468	0.005304	0.009848	0.008631	0.006901	0.0049335	0.0247335	0.0410435	0.0214585	0.0110325	0.0148925	0.0127255	-0.001425	0.017254	0.0106025	0.006869	0.0162785	0.004695	0.0042705	0.0279005	0.005923	0.0297835	0.0199595	0.0199905	0.022313	0.779246	0.744785	0.732848	0.0007895
hp_hsdS-MRSA252-1_611	-0.001186	0.001063	-0.001451	0.033378	0.810194	0.056196	0.0366225	0.003133	0.0329735	0.0042125	-0.000207	0.057262	-0.001984	0.0067595	0.001814	-0.000738	0.002567	-0.010163	0.0150985	0.017264	-1.25e-05	-0.0012605	0.0031745	0.0059515	0.003668	0.0008055	0.008593	0.0138725	0.006707	0.008178	0.0016005	0.002757	0.0003795	0.0055195	0.0018545	0.0069375	0.005183	0.0037035	-0.0013265	0.0107855	0.006631	0.0177305	0.0109475	-0.0002905	0.022525	0.0506295	0.0225345	0.085952	0.002334
hp_hsdS-MRSA252-2_611	0.002712	-0.0034695	0.002677	-0.003802	0.81699	-0.000836	0.0083765	0.0077255	0.003377	-0.0041885	0.001625	0.006778	-0.0062295	-0.0030595	0.001829	-0.0063205	-0.0037295	-0.015318	0.003153	0.002728	-0.0051355	-0.0028555	-0.0008095	0.0004915	-0.004012	0.001371	-0.003514	0.003717	-8.65e-05	-0.0010305	-8.35e-05	-0.0015735	0.0043865	-0.0024025	0.0008555	0.0009265	0.001264	0.005651	0.002525	0.002992	0.000757	0.01254	-0.0007855	-0.0007245	0.0073275	0.0036645	0.024527	0.0011075	0.819198
hp_hsdS-MW2-1_611	0.14009	0.140519	0.003851	0.258111	0.027681	0.837404	0.0651835	0.0060815	0.138259	0.120336	0.175924	0.134227	0.303001	0.720554	0.0128845	0.047896	0.086974	0.01896	0.079386	0.438751	0.16538	0.756612	0.64883	0.362572	0.187519	0.048703	0.0926955	0.706934	0.502565	0.21908	0.593161	0.564891	0.141315	0.276902	0.600003	0.541814	0.587386	0.446752	0.103001	0.440183	0.0975315	0.147622	0.373636	0.392407	0.358822	0.487085	0.410717	0.305624	0.018755
hp_hsdS-Mu50-2_611	0.808169	0.030411	0.826567	-0.009437	0.004782	0.0037275	0.006141	0.735002	-0.0004945	-0.0004005	-0.008131	0.0019495	-0.001179	0.0052775	0.000554	0.006314	-0.0008695	-0.025255	-0.004196	-0.001541	-0.002111	0.0030745	0.017149	0.0065505	-0.0005745	0.0024695	0.0062035	0.020234	0.0151795	0.0017335	0.005292	0.017374	0.0006505	-0.0048905	0.0282965	0.0051515	0.013244	0.0019855	-0.0007225	0.004313	0.0031625	0.0168765	0.003465	0.001765	0.016552	0.0045635	-0.0004905	0.001551	0.002188
hp_hsdS-RF122-1_611	-0.0017455	0.0020775	-0.0010845	0.838955	-0.0015475	0.0020375	0.0083865	0.004048	0.705598	0.0026715	0.0036495	0.653951	0.002269	0.0023865	0.73745	0.0033075	0.0017095	0.014087	0.005564	0.0038295	0.0042235	0.002825	0.018898	0.005014	-0.0022345	0.003634	0.0070965	0.012238	0.031775	0.0020775	0.014437	0.000604	0.003158	-0.0017845	0.058036	-0.001184	0.0068855	0.0021475	-0.001249	0.000301	-0.0008515	0.013394	0.005192	-0.0035575	0.0088785	0.765976	-0.003834	0.0004475	0.004925
hp_hsdS-RF122-2_611	0.003178	0.0044615	-0.0021195	0.813211	0.0017185	0.0013905	0.001114	0.0212305	0.681251	-0.0004865	0.004037	0.632357	0.0067835	-0.0028155	0.714965	-0.001017	-0.0008575	0.005152	0.002536	-0.0012855	0.001159	0.0022595	0.0087685	0.0047045	-0.002054	0.0039475	0.0005955	0.0211805	0.0221465	-0.0013725	0.008011	0.005314	-0.0049395	-0.0019225	0.032181	0.0028575	0.0082735	0.002471	0.001082	0.001587	0.004941	0.0170865	0.007443	-0.000183	0.00995	0.732235	-0.0049535	-0.003506	0.000717
hp_hsdS-etd_611	0.0035675	0.00322	-0.0016915	0.010758	0.001114	-0.0010985	0.002122	-0.002512	0.0062865	0.001906	0.0056855	0.0257995	0.796918	0.008197	0.006187	0.0007015	-0.0067715	0.006595	0.0104145	0.0019545	-0.002617	0.000229	0.03404	0.0081565	0.005843	0.006908	0.002729	0.22333	0.286591	0.005526	0.191002	0.0458895	0.009768	0.0026695	0.237024	0.0098355	0.124691	0.003454	0.000804	0.0128585	0.006877	0.0219765	0.0065425	0.004188	0.013854	0.005505	0.005936	-0.0018605	0.822893
hp_hysA_611	0.79198	0.0126475	0.818019	0.826048	0.002929	0.837629	0.832022	0.721356	0.679096	0.790926	0.0006335	0.638494	0.54852	0.046013	0.750273	0.005304	0.508046	0.057956	0.641175	0.482202	0.767122	0.739044	0.0310795	0.027506	0.0452595	-0.0019955	0.0583705	0.116083	0.0611175	0.0547895	0.067627	0.064073	0.006077	0.086584	0.0848645	0.0378365	0.0459055	0.0146825	0.011605	0.077925	0.0347515	0.0948275	0.0518985	0.0668395	0.101339	0.757424	-0.0040525	-0.0011795	0.0002465
hp_hysA_612	0.0703155	0.004532	0.206104	0.27399	0.80832	0.649372	0.409672	0.103376	0.37543	0.190832	0.0271175	0.386431	0.003975	0.157327	0.0575055	0.0092645	0.0033775	0.000537	0.0027985	0.0075365	0.243469	0.172455	0.015554	0.0027075	0.0025925	0.001666	0.0031835	0.017442	0.0106625	0.000862	-0.001616	0.0029895	-0.000476	0.0057125	0.04486	0.0043985	0.007211	0.002621	-0.000384	0.0026735	0.0031415	0.011057	0.0004225	0.0042215	0.0128885	0.272875	0.50961	0.444016	0.515834
hp_hysA_613	-0.0056775	0.025865	-0.0007395	0.0597625	0.803759	0.0007525	-0.00307	0.000541	0.011194	-0.0089895	-0.0027605	0.0054185	0.0011535	0.002318	0.002673	0.006723	0.004665	-0.017285	-0.003924	0.00476	-8e-06	0.0007255	0.003401	0.00271	-0.00058	-0.000208	0.001946	0.0114875	0.0124505	0.002322	-0.0026515	-0.0005525	0.001383	0.001813	0.0061875	0.0020305	0.000992	0.0009295	-0.0043995	-0.000653	0.003421	0.014296	0.003017	-0.00073	0.008431	0.004219	-0.000893	0.004824	0.0001045
hp_hysA_614	0.786058	-0.003083	0.816229	0.839408	0.798468	0.844007	0.836034	0.720455	0.693515	0.783944	0.838661	0.667189	0.815371	0.715515	0.770703	0.006382	0.396191	0.666435	0.698345	0.624977	0.771867	0.72954	0.693561	0.749286	0.812533	0.657885	0.745896	0.7806	0.747098	0.698152	0.397368	0.819192	0.436589	0.77915	0.658655	0.707379	0.618257	0.719921	0.747283	0.778118	0.724768	0.727704	0.818606	0.816088	0.74117	0.749037	0.796486	0.789602	0.834347
hp_hysA_615	0.004739	0.0078915	-0.004031	0.834754	0.808317	0.004016	0.826337	0.001258	0.67042	0.794385	-0.0049745	0.656659	-0.004652	0.0121025	0.759315	0.00789	0.39524	0.480026	0.388838	0.0056945	0.000119	0.740172	0.67116	0.738179	0.790511	0.684029	0.739872	0.758839	0.741275	0.694064	0.805771	0.804327	0.557898	0.769557	0.648837	0.683964	0.603519	0.705774	0.750883	0.764047	0.685057	0.726592	0.813304	0.809899	0.741738	0.719901	0.0074655	-0.001062	0.478544
hp_hysA_616	0.809758	0.0241895	0.830035	0.837179	0.811659	0.842137	0.0008265	0.731774	0.687584	0.005409	0.846286	0.66306	0.844956	0.737258	0.74415	0.0042205	0.0014805	0.004116	0.000227	0.5897	0.77685	-0.00337	0.00266	0.002312	0.0030415	0.002804	0.002775	0.0028315	0.0062125	-0.0014635	0.0005055	0.003137	0.007407	0.0029305	0.001302	-0.0011355	0.000536	0.00126	0.0004235	0.0009965	0.0040955	0.057283	0.031239	-0.000617	0.001197	0.758809	0.786683	0.780377	0.000928
hp_hysA_617	0.010355	0.0091055	0.0053265	0.823386	0.822764	0.0826935	0.838383	0.0047965	0.715978	0.819894	0.0116955	0.67815	0.0035095	-0.0025375	0.747327	0.0051805	0.682921	0.701978	0.741699	0.004954	0.02345	0.747746	0.675796	0.756499	0.806321	0.712306	0.75257	0.763674	0.763805	0.721218	0.804064	0.809311	0.507977	0.783964	0.680402	0.683667	0.606117	0.731068	0.776834	0.775206	0.744482	0.706762	0.831176	0.819644	0.740848	0.759669	0.002102	0.0020035	0.805553
hp_hysA_618	0.799678	-0.006366	0.824103	0.830966	0.819317	0.828413	0.0010275	0.723937	0.70862	0.0015335	0.837823	0.66437	0.833171	0.692626	0.735768	0.001269	-0.005633	0.000559	-0.0191725	0.469336	0.74093	0.0009635	0.000475	-0.0012565	-0.0009735	-0.013864	0.0012655	-0.0005285	0.009556	-0.00133	0.0052395	0.0004595	0.0008145	-0.0008165	-0.0015155	0.000166	0.004493	-0.001755	-0.0011085	0.00256	0.0031095	0.059685	0.000485	-0.001642	0.016993	0.774982	0.746708	0.717046	-0.0001265
hp_icaA_611	0.770087	-0.001023	0.820985	0.843209	0.828696	0.825501	0.832108	0.688214	0.690913	0.811762	0.836583	0.666637	0.829956	0.660516	0.76323	0.0078275	0.674732	0.777986	0.756794	0.731329	0.694234	0.714768	0.638511	0.713913	0.784606	0.695287	0.734519	0.731515	0.751833	0.700266	0.790781	0.797843	0.0051745	0.76079	0.625199	0.667903	0.570966	0.699123	0.738772	0.75685	0.682776	0.680656	0.814384	0.804696	0.705053	0.743623	0.711386	0.704588	0.823214
hp_icaC_611	0.759394	-0.002397	0.815873	0.835144	0.826987	0.825485	0.822904	0.695564	0.706882	0.801898	0.825805	0.668355	0.819762	0.68921	0.748282	0.007814	0.550342	0.638019	0.661697	0.639125	0.668513	0.738926	0.642267	0.700503	0.782376	0.590145	0.7188	0.725543	0.717736	0.660301	0.762632	0.784066	0.441596	0.744869	0.612981	0.621788	0.547247	0.65386	0.750847	0.744617	0.706778	0.672032	0.805353	0.782314	0.683007	0.768864	0.745829	0.719108	-0.000543
hp_icaD_611	0.766118	-0.0128645	0.818399	0.836331	0.835638	0.824929	0.826075	0.686974	0.687039	0.805474	0.833716	0.668175	0.823272	0.688802	0.751687	0.001234	0.627027	0.59984	0.68145	0.58021	0.684694	0.715732	0.609913	0.707125	0.779093	0.637912	0.71329	0.709884	0.7325	0.68008	0.766559	0.773848	0.007589	0.738042	0.578122	0.604093	0.528151	0.634461	0.748552	0.747739	0.710535	0.640541	0.80275	0.771361	0.673212	0.767311	0.735411	0.720144	0.782963
hp_isaB_611	0.76435	0.016422	0.816384	0.828798	0.130813	0.816987	0.804545	0.668099	0.667246	0.776215	0.829428	0.630881	0.824489	0.66535	0.718395	0.001523	0.647732	0.751403	0.748602	0.744206	0.721526	0.689207	0.547634	0.64585	0.754324	0.66616	0.657504	0.68729	0.69353	0.62998	0.753697	0.769096	0.580072	0.712563	0.548992	0.613822	0.543387	0.647763	0.710299	0.71022	0.666951	0.591738	0.781392	0.75714	0.629641	0.729711	0.743837	0.717938	0.785733
hp_isaB_612	0.704481	0.001018	0.78761	0.802425	0.816922	0.7868	0.780514	0.625667	0.656881	0.726004	0.809946	0.609774	0.464763	0.608428	0.669169	0.0105645	0.393224	0.672157	0.587918	0.567797	0.731872	0.66823	0.545799	0.613293	0.713634	0.590233	0.596205	0.656559	0.633777	0.574561	0.701355	0.733409	0.495324	0.674999	0.530839	0.613171	0.544608	0.625499	0.65269	0.668544	0.617192	0.579604	0.742346	0.724284	0.610796	0.689528	0.703387	0.703086	0.776701
hp_isdA_611	0.759591	-0.0064595	0.80732	0.828719	0.815104	0.8042	0.80292	0.680897	0.634066	0.744733	0.812296	0.621721	0.815968	0.631608	0.694678	0.007591	0.626605	0.574354	0.681909	0.611801	0.739278	0.697751	0.560779	0.623525	0.753414	0.652742	0.631876	0.634911	0.657984	0.631407	0.723988	0.741167	0.600558	0.704509	0.52934	0.62352	0.558913	0.655184	0.689748	0.664168	0.678243	0.565083	0.763897	0.764849	0.628272	0.676333	0.681168	0.659002	0.80824
hp_isdA_612	0.012287	-0.000818	0.122662	0.361021	0.832267	0.207051	0.144041	0.116484	0.320754	0.147871	0.361997	0.436663	0.286539	0.415838	0.0320485	-0.000678	0.009245	-0.00683	0.0057795	-0.0021535	0.225444	0.214276	0.309708	0.362912	0.200402	0.0436275	0.243606	0.538712	0.319676	0.198213	0.450468	0.393788	0.021891	0.432315	0.208538	0.312881	0.371031	0.0784265	0.165403	0.475085	0.151962	0.399776	0.538831	0.480615	0.401093	0.476867	0.344004	0.386608	0.0513655
hp_isdA_614	0.735401	0.035161	0.819767	0.838809	0.119815	0.82916	0.82804	0.72806	0.694837	0.792771	0.841797	0.654644	0.835435	0.752624	0.757746	0.007906	0.634505	0.444811	0.517278	0.382026	0.79359	0.793534	0.661288	0.715286	0.796349	0.619752	0.717126	0.718301	0.701817	0.679947	0.762194	0.79456	0.327502	0.765361	0.634908	0.689563	0.619338	0.708927	0.734853	0.739213	0.704893	0.693026	0.803025	0.802368	0.710259	0.763165	0.770821	0.761356	0.0007885
hp_kdpA-SCC_611	0.757497	-0.0008885	0.815861	0.0063875	0.837288	0.0006625	-0.004109	0.0046265	0.0028675	0.000801	-0.0005765	0.0172995	0.0039095	0.011371	-0.0009435	0.702644	0.00027	-0.006279	0.0037905	-0.001207	0.0022765	0.0051035	0.0061745	-0.0008055	-0.000384	-0.000794	0.005366	0.0194	0.0127315	-0.0003305	0.001395	0.0066765	0.000162	0.004409	0.005472	0.001053	0.0061475	-0.0146805	0.000961	0.012098	0.000356	-0.000117	0.0062605	0.006125	0.0159385	0.004212	0.005555	0.005853	0.0038985
hp_kdpB-SCC_611	0.733223	0.0028455	0.803936	3.15e-05	0.816271	-0.000507	0.0039285	0.0006195	0.00642	-0.000255	-0.0042095	0.0052705	0.000355	0.0065115	-0.003282	0.412057	0.0009505	-0.001159	0.0037305	0.0008795	0.01171	0.0163235	0.0079845	0.002353	-0.0028945	-0.003245	-0.00314	0.015112	0.0145765	0.0064445	-0.0025135	0.007335	0.002789	0.008079	0.0062025	0.0023805	0.0004665	6.55e-05	0.0050965	0.005716	0.007618	0.012829	0.0013055	0.010381	0.00799	0.006737	0.001878	-0.002236	0.000155
hp_kdpC-SCC_612	0.77563	-0.000547	0.820126	-0.001113	0.830874	0.002866	-0.000921	0.0031635	-0.0006555	0.0093375	0.0053045	-0.003561	0.0027295	0.003052	-0.0014655	0.686526	-0.0017245	0	0.00289	-0.0044355	0.0052585	-0.0013325	0.009556	0.004792	0.0022875	0.00359	0.0185525	0.0057595	0.0027175	-0.0002625	-0.002882	0.009674	0.001833	-0.0050775	0.0203355	-0.0029945	0.002447	-0.0015005	0.002631	0.0011925	0.0016505	0.005587	0.00051	0.000355	0.0103305	0.000369	-0.00141	0.0013805	0.000384
hp_kdpD-SCC_611	0.786014	0.012307	0.823229	0.0073245	0.828598	-0.000967	-0.000816	-0.003376	0.0004585	-0.0007105	-0.0074105	0.0013365	0.003502	0.0015345	-0.001294	0.771381	0.0020445	-0.003619	-0.0017455	-0.003825	0.015962	-0.00132	0.02022	0.0028085	0.0031505	0.003977	0.004113	0.019539	0.0190605	-0.00218	0.0083185	-0.0024175	-0.0022655	0.004171	0.0550635	0.0009705	0.0084695	0.0005985	0.000284	0.0052565	0.0019555	0.0085335	0.0072025	0.001836	0.0117395	0.000425	0.00213	0.000333	0.000998
hp_kdpE-SCC_611	0.768801	-0.0027525	0.817883	0.000566	0.808407	-0.000846	-0.0008305	0.0041835	-0.0014495	0.001476	-0.0008715	-8.95e-05	-0.0003855	-0.0009915	-0.002299	0.629521	-0.000372	0.007712	0.0006945	0.014929	0.007824	0.0001095	0.010431	0.0079815	0.0031115	0.008328	0.003634	0.0436505	0.0339485	0.007875	0.0229825	0.0045235	0.0008965	0.012506	0.0083105	-0.0007845	0.0081825	0.0020495	0.0041935	0.0102375	0.010689	0.016167	0.0096905	0.0076795	0.018467	-0.000716	-0.0040375	-0.0010995	0.001686
hp_lmrP_611	0.77886	-0.000884	0.829271	0.0039445	0.81939	0.83819	0.835467	0.694705	-0.0013005	0.805652	0.001471	0.000566	0.0050495	0.690663	0.0017125	0.022365	0.685318	0.750807	0.752736	0.740895	0.74781	0.712493	0.228399	0.014595	0.0094975	0.004075	0.012787	0.152877	0.114678	0.01518	0.188818	0.0226215	0.020303	0.0203955	0.343207	0.0216315	0.056993	0.016586	0.006404	0.0495265	-0.0059015	0.01002	0.0392895	0.0101975	0.0117865	0.029265	0.023524	0.045235	0.004831
hp_lmrP_612	0.0090175	0.010177	0.024425	0.84878	0.019351	0.0601935	0.041474	-0.004685	0.688852	0.037785	0.837543	0.688379	0.824657	0.054512	0.752618	0.001496	-0.002997	-0.007949	-0.006538	-0.002426	0.0606865	0.020296	0.612659	0.686893	0.788567	0.650175	0.710941	0.727345	0.686638	0.684474	0.780682	0.770659	0.599855	0.748372	0.583563	0.66422	0.568794	0.668416	0.739227	0.723096	0.70116	0.656023	0.815792	0.810147	0.705288	0.759348	0.74504	0.729434	0.808102
hp_lmrP_613	0.787343	0.0494865	0.821481	0.0461655	0.832333	0.833716	0.832629	0.724715	0.066811	0.816476	0.037624	0.134984	0.0860735	0.691661	-0.0004335	0.008003	0.613395	0.233995	0.744522	0.732971	0.744229	0.735673	0.082217	0.0905175	0.02604	0.0212395	0.034169	0.279196	0.122006	0.061417	0.0769465	0.069554	0.0225765	0.131449	0.141084	0.131042	0.155573	0.0181295	0.06199	0.221771	0.0224695	0.117637	0.185399	0.137754	0.088535	0.137639	0.063987	0.0900315	0.0434045
hp_lmrP_614	0.0111565	0.0059745	-0.0014975	0.839125	0.00508	0.0342225	0.0030215	0.0060475	0.660029	0.000549	0.837812	0.63745	0.79757	0.025407	0.74059	0.0072355	-0.0035805	-0.002662	-0.0045625	0.00182	0.003749	0.0240585	0.656544	0.719122	0.808844	0.691717	0.720608	0.759018	0.732816	0.710281	0.809485	0.793195	0.631927	0.767297	0.616724	0.693307	0.623182	0.743167	0.765866	0.738321	0.744532	0.681147	0.825712	0.819383	0.699274	0.729038	0.716581	0.707481	0.831528
hp_lukS-ST45_611	0.276927	0.006206	0.612372	0.484896	0.623243	0.764297	0.654011	0.551567	0.525132	0.616653	0.601986	0.585774	0.430638	0.490514	0.119639	-0.0026245	0.016657	0.018877	-0.001278	0.000629	0.610229	0.458431	0.616283	0.572018	0.591504	0.246001	0.58455	0.666643	0.452151	0.468523	0.683104	0.69977	0.276634	0.634487	0.575686	0.545637	0.55549	0.329331	0.451268	0.67355	0.288629	0.530371	0.715496	0.65942	0.572777	0.625434	0.464761	0.53574	0.0025295
hp_map_611	0.16917	-0.002949	0.682706	0.836129	0.047787	0.490714	0.827738	0.507324	0.66498	0.81014	0.831278	0.651043	0.793698	0.675132	0.761161	0.0022135	0.647247	0.670036	0.72332	0.0060845	0.23267	0.08278	0.636976	0.69779	0.817354	0.76374	0.705143	0.732843	0.742144	0.720141	0.802609	0.772648	0.662737	0.774965	0.620487	0.686419	0.616374	0.730855	0.780677	0.759861	0.758837	0.689838	0.82826	0.818159	0.702423	0.720719	0.688497	0.719848	0.002647
hp_map_612	0.773001	0.012066	0.798386	0.455476	0.120969	0.822122	0.378163	0.718022	0.420575	0.340912	0.499553	0.617904	0.744637	0.646725	0.0450035	-0.000979	0.007152	-0.007555	0.003609	0.037969	0.733472	0.720152	0.382507	0.475808	0.400039	0.229919	0.471515	0.674877	0.514645	0.231023	0.567951	0.639306	0.100525	0.544367	0.327735	0.362125	0.498566	0.123912	0.2144	0.687165	0.178355	0.468656	0.63492	0.57173	0.449786	0.643887	0.514898	0.609424	0.0023435
hp_map_613	0.0083335	-0.0028385	0.0109355	0.048092	0.813735	0.087964	-0.0006095	0.019982	0.007298	0.000165	-0.000569	0.02527	-0.0032235	0.268489	0.0011645	0.0050805	0.001971	0.009337	0.007665	0.002488	0.0702745	0.017829	0.0349275	0.001275	0.009006	0.0054505	0.0031935	0.0531715	0.070125	0.0007145	0.0502365	0.0204875	0.003894	0.0026705	0.043657	0.0056725	0.03921	-0.002164	0.0018565	0.009317	0.004834	0.023211	0.0066215	0.0058065	0.016698	0.0017445	0.0012065	0.0018515	0.0032475
hp_mecI_611	0.761885	-0.0026635	0.81197	0.0223845	0.79379	0.0007885	-0.000237	0.001631	0.002403	-0.0002595	-0.00058	0.0054975	0.0024045	-0.0026205	0.00183	0.528728	-0.0004145	0.000389	5.8e-05	0.00049	0.000776	0.0023385	0.002621	0.0005325	-0.001207	0.00344	-0.0030755	0.0080275	0.002609	0.0011345	0.001126	0.0049715	0.0030565	0.0041315	-0.0007525	-0.0018135	-0.003555	0.0009745	0.0023875	0.0011795	0.0034615	0.011237	-0.0018275	0.002134	0.0188365	0.001204	-0.0014245	0.000915	0.0020885
hp_mecR_611	0.736061	0.049777	0.7962	0.0422435	0.785632	0.0062995	-0.0019595	0.713933	0.0065035	0.797797	0.001028	0.015231	0.828709	0.005773	-0.003955	0.767097	0.689231	0.71836	0.750626	0.729978	-0.0019325	0.711827	0.0086615	0.002014	-0.0013265	0.0058935	-0.0002865	0.010722	0.0054305	0.0002515	0.000725	-0.0026615	0.001578	0.0019315	0.0099795	-0.00042	0.003069	0.000366	0.0089245	0.000766	-0.0019365	0.046817	-0.000368	-0.004173	0.0089735	-0.0001385	-0.0012555	-0.008555	-0.002484
hp_mecR_612	0.778165	0.0024535	0.808275	0.152074	0.800778	0.01998	0.008416	0.0202345	0.108939	0.0065605	0.0300995	0.246001	0.070428	0.0546975	-0.0015675	0.718333	-0.0022995	0.003726	0.0061795	0.0004	0.033727	0.0218085	0.155129	0.0729145	0.003375	0.0050635	0.036603	0.0618915	0.065312	0.0101895	0.0167115	0.038143	0.0112735	0.0099745	0.125519	0.0068515	0.019125	8.8e-05	-0.000529	0.0196495	0.0266855	0.066573	0.0446675	0.0103225	0.084397	0.140958	0.0494235	0.099281	0.0323365
hp_mefA_611	0.008618	0.008053	0.023263	0.002703	0.0105415	0.0010715	-0.00056	0.0107595	-0.00501	-0.0008015	-0.0023845	-0.001302	-0.000759	0.0269965	0.0001465	-0.003396	-0.0023075	0.005423	-0.0028035	0.0004155	-0.002396	0.0022055	-0.000635	0.000956	-0.000773	0.005407	-0.0036235	0.0016705	0.0094755	-0.0018765	0.002518	-0.0081035	0.0045015	0.003226	0.0010005	0.003595	-0.0006895	-0.000232	0.0003675	0.00037	0.003813	0.006431	-0.0015145	0.0031915	-0.0008125	-0.0006455	-0.0009795	-0.004716	0.0024075
hp_mefA_612	0.003016	0.015931	0.0177855	0.0044405	0.004392	-0.0006355	0.003134	0.007234	-0.0045015	0.0005555	-0.0024025	0.0030405	-0.004869	-0.0009855	0.00196	0.0057685	-0.0081425	0.001894	0.0037795	0.001741	-0.0010995	-0.0021545	-0.0001275	0.0019695	-0.0042155	-0.000902	0.0045155	-0.001165	0.0028435	0.001058	-0.002122	-0.0034235	-0.0008355	0.004273	0.001042	-0.003958	-0.000358	-0.001852	0.000427	0.0012805	0.004396	0.025536	0.0002115	0.001155	0.010686	-0.001209	0.001109	0.0013835	0.0037405
hp_merA_611	-0.0019305	0.853658	-0.0007885	0.01349	-0.0047875	0.0007205	-0.00029	0.001513	-0.0013515	-0.0002115	-0.004406	0.005966	-0.0006075	-0.0037665	0.001544	0.001536	-0.002968	0.73256	-0.0072485	0.003589	-0.0305425	-0.002852	-0.0015075	0.0033135	0.001883	0.0019425	0.0037625	0.005628	0.004697	-0.0004105	0.001946	-0.0008005	0.010611	0.004011	-0.0020015	0.0002895	-0.0021295	0.0007805	0.0004925	0.0013095	0.004715	0.015448	0.0002775	-6.5e-05	0.0152045	-0.002098	0.000835	0.013089	0.0015725
hp_merB_611	0.000403	0.849661	0.0002205	0.0077595	0.001111	0.0016155	-0.000424	-0.000952	-0.0026575	-0.002967	-0.0003815	-0.002357	0.0010165	0.004717	1e-06	0.001089	-0.0003685	0.778736	-0.004078	0.0027175	-0.004819	0.000699	0.0711225	0.0068405	-0.005329	0.018799	-0.0032425	0.025174	0.024267	0.0020885	0.0115035	0.0001185	-0.0019015	-0.004504	0.085893	0.001616	0.009295	0.002825	0.019302	0.0048	0.0066445	0.0126715	-0.000692	-0.00495	0.015768	0.004518	0.0021055	0.001728	0.001836
hp_mpbBM_611	-0.0041015	0.004498	-0.0030575	0.0118185	-0.0014155	-0.000929	0.001092	0.0048395	0.0054295	-0.0045405	0.0006985	0.0390715	-0.0002755	0.0235395	-0.001044	0.0076605	0.675779	-0.006834	-0.003661	0.007633	0.66796	0.0009	0.0042755	-0.000829	0.000428	-0.000979	-0.0016595	0.0019025	0.001104	0.001734	-0.0016985	0.0090505	0.000621	0.001282	0.009812	-0.002456	-0.0018555	0.0014925	0.0006755	0.002713	-0.0012185	-8.5e-05	-0.0009165	-0.003169	0.00709	0.0083395	0.000876	0.015687	-0.0007455
hp_mpbBM_612	-0.0032035	0.0102435	0.001832	-0.018013	-0.000493	-0.002237	-0.004629	-0.0001175	-0.00118	0.0030685	-0.0002625	0.0003295	0.0042	0.0071175	0.0015165	0.001065	0.651786	0.00268	-0.0060955	3.95e-05	0.688054	-0.0029045	0.0064225	0.0163805	-0.001937	-0.003832	-0.0001995	0.007829	0.017624	0.002308	-0.001298	8.35e-05	0.0033595	-0.0043835	0.009462	0.0025305	0.005026	0.001376	-0.0002085	0.002713	-0.0014295	-5.35e-05	-0.006382	-0.003013	-0.001126	0.002899	-0.000412	0.0020225	0.0019495
hp_mprF_611	0.560477	0.026001	0.684737	0.817927	0.709186	0.807795	0.784346	0.609618	0.732602	0.767502	0.015649	0.677509	0.811449	0.69646	0.68255	0.0026485	0.52712	0.494094	0.520661	0.447422	0.754852	0.741542	0.614592	0.699977	0.723449	0.527151	0.671037	0.745966	0.678283	0.612123	0.758879	0.779811	0.364154	0.740183	0.595023	0.656017	0.593094	0.677069	0.676453	0.736291	0.633099	0.679661	0.77253	0.764184	0.699574	0.805348	0.055362	0.121254	0.748611
hp_mprF_612	0.712521	0.004149	0.800412	0.560604	0.810974	0.737202	0.683263	0.668462	0.619702	0.664527	0.158726	0.624788	0.615978	0.648121	0.333738	0.017775	0.022328	0.20125	0.017088	0.004769	0.654598	0.608218	0.546663	0.581946	0.623787	0.303096	0.567321	0.646575	0.506958	0.436325	0.637705	0.683335	0.210546	0.624441	0.467412	0.583192	0.537743	0.469766	0.5091	0.678289	0.358827	0.546522	0.679185	0.625093	0.558941	0.67452	0.172102	0.279782	0.0007345
hp_nuc1_611	0.762699	0.004934	0.803071	0.820103	0.822971	0.800909	0.800903	0.686612	0.644428	0.765426	0.8116	0.620475	0.798785	0.65789	0.711879	0.00934	0.618442	0.751217	0.748676	0.742718	0.734881	0.694752	0.573198	0.647989	0.73828	0.671307	0.642762	0.667903	0.68996	0.637847	0.748574	0.745982	0.576869	0.728343	0.572674	0.637058	0.558962	0.658738	0.706792	0.71318	0.677822	0.636599	0.777562	0.773108	0.64907	0.689646	0.706557	0.704959	0.823647
hp_plsSCC_611	0.0027975	0.006714	0.0025625	-0.001921	0.004231	0.004031	-0.001346	-0.001195	-0.001022	0.797322	0.0135365	0.006993	0.007501	0.0042355	0.023305	0.004404	-0.0026465	0.005148	0.0085935	0.0043025	-0.002268	0.013094	0.024947	0.0079615	-0.0005755	0.0027205	0.0086585	0.039092	0.024009	0.003787	0.0295165	0.001652	-0.0042705	0.008429	0.035028	0.0110535	0.0118225	0.0005575	0.004437	0.0198275	0.003555	0.026668	0.0187915	0.014104	0.018201	0.0039455	-0.0011545	-0.0005635	0.001453
hp_qacA_611	0.769374	-0.000247	-0.0103745	-0.001127	-0.003004	0.008214	-0.0002715	-0.0064965	-0.0018215	0.00097	-0.002827	-0.0001685	-0.0056145	0.0036695	0.0015915	-0.000684	-0.003243	0.005588	0.013141	0.0085245	-0.002859	-5e-05	0.019192	0.000106	-0.00039	0.0013775	-0.0037235	0.001177	0.0048915	-0.0020325	0.003725	-0.0020095	0.0009265	0.0002095	0.0250635	-0.000654	-0.004348	0.0076915	0.0012615	0.00342	-0.0010335	0.016445	0.0001475	-0.004164	-0.0005205	0.002637	-0.002186	-0.004736	0.0014795
hp_qacC_611	0.005813	-0.001258	-0.007109	-0.003569	-0.0060585	-0.0051725	-0.003311	0.0009775	0.0060455	-0.005266	0.0034715	-0.0030725	0.0017975	0.003662	-0.000486	-0.000785	-0.001732	0.006393	0.001471	0.0011105	0.0019865	0.00089	0.0043545	0.0032555	-0.0021895	0.000415	-0.002121	-0.001288	0.001648	0.003142	0.0005755	-0.003434	0.000513	-0.000313	0.0049055	-0.0002	-0.003209	-0.00361	0.001805	-0.0002505	0.0003235	0.009259	0.000297	-0.0004495	0.0103105	0.000593	-0.000915	0.0038285	0.001716
hp_qacC_612	0.0009715	0.003383	-0.0025925	-0.003605	0.0003325	0.0019105	-0.001054	-0.004838	0.0026285	0.0004505	0.009814	0.007502	0.004013	-0.001614	0.0034795	-0.0008255	0.001193	0.000464	-0.000406	0.002829	0.0006905	-0.0003625	0.00046	0.003198	-0.0021155	-0.0002395	-0.002081	0.002265	0.001369	0.0012485	0.0014925	-0.0011215	-0.0005145	0.003209	0.0082725	-0.0006075	-0.0001365	0.0003355	-0.001553	-0.001156	-0.000866	0.007026	-0.002147	-0.0012435	0.0046325	-0.001536	-3.85e-05	0.0045695	0.003201
hp_qacC_613	-0.002105	-0.0051135	0.002639	-0.0029415	0.0015065	0.0044545	-0.0005055	0.002201	-0.002069	-0.000164	0.0046045	0.0243715	0.0068045	-0.002245	0.00137	0.001072	0.005138	0.007649	0.004012	-0.003533	-0.0020295	-0.0008055	0.0131145	-0.001252	-0.003088	0.0040815	0.0062785	0.0042895	-0.001883	0.003191	-0.0033885	0.005525	0.0008335	-0.002187	0.024667	-0.0017225	0.0008015	0.002643	-0.000828	0.0047565	0.003372	0.006646	-0.001335	0.0008795	0.0248375	-0.0027	0.0013935	0.0032875	0.00412
hp_qacC_614	-0.0009655	0.000942	-0.002947	-0.005413	-0.0028195	0.001262	-0.0002245	-0.0016755	0.0018645	-0.0042935	0.0086785	0.0024865	0.0034445	-0.003223	-0.0043895	-0.001672	-0.0038085	0.009624	0.0116765	0.0005495	0.0028905	-0.0021695	0.009032	0.0005185	-0.0032155	0.0016885	0.016086	0.0054345	0.001301	-0.0021985	-0.003262	-0.001986	-0.0068695	-0.002675	0.0113705	0.0016115	0.003605	0.0102335	-0.0004975	0.000251	0.0042845	0.004138	-0.0003375	-0.0025675	0.003925	0.000571	-0.0032795	-0.000428	0.001746
hp_qacC_615	0.0105525	0.012773	0.001429	-0.009832	0.003558	0.0001655	-0.0001865	-0.000185	-0.0016015	0.0038085	0.0030625	-0.00026	0.017227	-0.002707	-0.004856	0.003367	-0.004966	-0.003878	0.002407	-0.0018365	0.0152925	0.002694	0.0025355	-0.0030565	-0.002225	0.002811	0.0202855	0.0026775	0.00972	-0.0003585	-0.0023655	-0.0066045	0.001993	0.001971	0.0034585	-0.0020685	-0.0027385	-0.0007905	-0.002731	0.0034415	0.0045675	0.0083645	-0.0027735	0.0018635	0.0067925	0.0053775	-0.001792	0.002652	0.0003315
hp_saeS_611	0.70306	0.0038025	0.816473	0.840869	0.809986	0.824574	0.816725	0.691866	0.683453	0.763311	0.833187	0.671768	0.80626	0.673199	0.737122	0.001951	0.625928	0.752823	0.662847	0.628406	0.741863	0.697773	0.619122	0.684212	0.765281	0.654946	0.663843	0.730913	0.683716	0.676902	0.759589	0.760953	0.567424	0.737564	0.623754	0.652267	0.58299	0.657004	0.7266	0.727702	0.689551	0.649058	0.809561	0.797822	0.693763	0.759788	0.733654	0.71015	0.799606
hp_sak_611	0.708859	0.003593	0.819417	0.000357	0.814109	0.819819	0.818342	0.703288	0.004754	0.004143	0.011415	0.026137	0.786418	0.008083	0.003563	0.0009945	0.624669	0.625671	0.665083	0.668872	-0.0001705	0.68784	0.608002	0.62969	0.754883	0.671609	0.681577	0.676384	0.66972	0.635568	0.751461	0.748444	0.61048	0.692749	0.557439	0.62524	0.514387	0.599182	0.690259	0.675741	0.667628	0.573476	0.791764	0.787432	0.630677	0.0127975	0.0090365	0.007177	0.78281
hp_sarA_611	0.655082	0.0159065	0.809859	0.840969	0.818451	0.817644	0.812685	0.695874	0.658299	0.755011	0.822447	0.654983	0.785301	0.63328	0.730255	0.004192	0.635166	0.592066	0.60289	0.542012	0.713752	0.654211	0.642506	0.681301	0.787822	0.70544	0.647971	0.71846	0.693071	0.689725	0.401396	0.768664	0.638069	0.725738	0.577277	0.645288	0.566728	0.679616	0.737831	0.717091	0.703401	0.629735	0.81162	0.813928	0.657782	0.738706	0.688435	0.69086	0.80818
hp_sasG_611	0.767524	0.010009	0.810806	0.010919	0.0003305	0.816089	0.820966	0.715746	0.0021005	0.780325	-0.001283	0.0016535	0.7614	-0.00269	-0.0015045	0.0007135	0.59679	0.718749	0.683768	0.664878	0.710203	0.672545	0.207631	-0.0011575	0.000109	-0.000176	-0.0033495	0.138481	0.08525	0.0045895	0.078398	0.0128945	0.012085	0.0019435	0.287976	0.002564	0.0739625	-0.0002155	0.0005875	0.0019145	0.005187	0.020658	-0.0049065	-0.0005195	0.0104235	-0.0043605	0.677933	0.686316	-0.0003585
hp_sasG_612	0.00683	-0.0070515	0.023697	0.003195	0.002318	0.821804	0.0006295	0.0043265	0.060912	0.0026785	0.0663255	0.15291	0.792216	0.0924795	-0.0027905	0.001765	-0.001788	-0.002863	-0.001681	0.722066	0.724926	0.6985	0.413694	0.163357	0.170273	0.0237765	0.165733	0.465137	0.291555	0.185923	0.379756	0.269362	0.027084	0.146506	0.428488	0.256785	0.357669	0.0789475	0.0483825	0.182063	0.0737945	0.273818	0.179825	0.24321	0.229666	0.107199	0.0339245	0.0321195	0.0685485
hp_sasG_613	0.777123	-0.0008005	0.797451	-0.022435	-0.000407	0.002315	0.8254	0.719913	0.00168	0.801985	-0.0093505	0.0075065	-0.011535	0.0044735	-0.0030835	0.0016055	0.648665	0.682534	0.702821	0.000102	0.0030575	0.014486	0.132583	-0.00138	0.0023085	-5.6e-05	5e-05	0.135252	0.203022	-0.0013525	0.10136	0.0061825	0.0120735	-0.001862	0.140388	0.0061625	0.0788935	-0.000704	-0.0045915	-0.002408	0.0007645	0.0065115	-0.0012355	0.001012	0.003526	-0.005128	0.715774	0.731529	-0.0007755
hp_scn_611	0.712471	0.031632	0.76596	0.0215225	0.816162	0.818163	0.820771	0.690013	0.0007095	0.212929	0.0105255	0.0061255	0.807387	0.0643445	0.00301	0.0041205	0.521743	0.588704	0.656427	0.574116	0.727348	0.707641	0.696179	0.74318	0.792609	0.681356	0.721299	0.791827	0.72525	0.704219	0.7877	0.803614	0.323777	0.778066	0.685339	0.71916	0.638389	0.695575	0.722392	0.763715	0.712414	0.732381	0.821368	0.808933	0.757812	0.048859	0.408481	0.439315	0.831445
hp_sdrC_611	0.747058	0.034081	0.811532	0.0332745	0.003485	0.829921	0.833583	0.722348	8.1e-05	0.796466	0.007117	0.0088915	0.0077715	0.666179	0.000917	-0.002938	0.64572	0.726333	0.740542	0.734216	0.706597	0.706663	0.030871	0.00084	0.003512	0.002342	0.0042705	0.041886	0.0635475	0.0032635	0.0324865	0.0068965	-0.0033985	-0.0020515	0.045511	0.004655	0.0232405	0.0004985	-0.0002365	-0.0008255	0.0025215	0.0134045	0.001399	0.0023375	0.011523	0.004264	0.0966745	0.141192	0.0049565
hp_sdrC_612	0.016844	-0.002963	0.0368245	0.0219615	0.0022175	0.107739	0.112465	0.0097785	0.000147	0.0663175	0.0001665	0.0098495	-0.002168	0.071116	-0.005078	-0.002585	0.002993	0.000402	0.002478	0.001873	0.087055	0.0204595	0.0331135	-0.0016645	-0.0033075	0.0008	4.1e-05	0.0239345	0.0246345	0.001568	0.0184675	0.0040165	-0.001866	0.003359	0.051825	0.0008955	0.0050595	0.000161	-0.001316	-0.0001245	0.00312	0.0514385	0.0051585	0.001103	0.0116185	0.005544	0.0907705	0.120179	0.001184
hp_sdrC_613	0.77936	0.0170655	0.815057	0.848599	0.820391	0.84359	0.842086	0.718299	0.700983	0.796323	0.850145	0.689908	0.837951	0.695561	0.789264	0.007739	0.681712	0.763798	0.762738	0.749928	0.748493	0.746609	0.652991	0.728656	0.812325	0.769151	0.731453	0.759307	0.754499	0.719215	0.399112	0.798873	0.575738	0.771548	0.641128	0.682986	0.595805	0.706989	0.779934	0.77379	0.750535	0.700745	0.83088	0.817653	0.72504	0.773041	0.764997	0.760297	0.001032
hp_sdrC_614	0.776354	0.0183275	0.80816	0.119625	0.008318	0.144381	0.122838	0.719785	0.0067185	0.075566	0.0232165	0.006544	0.0520445	0.698524	0.0239625	0.00194	-0.003804	0.002995	0.0025645	0.0102	0.796569	0.00682	0.0179445	0.001363	0.008294	0.0149375	0.00501	0.063176	0.068285	0.003918	0.0152915	0.0332995	0.0078155	0.0082705	0.027169	0.000872	0.012675	0.0015225	0.0036295	0.012903	-0.0003025	0.0179885	0.00264	0.0008075	0.013477	0.1694	0.391613	0.356492	0.000673
hp_sdrC_615	0.0108955	0.007051	0.007542	0.0598015	0.004049	0.0281215	0.842444	0.0061055	0.0353895	0.82201	0.84453	0.067167	0.0036355	0.026206	-0.0030265	0.0018405	0.687091	0.74451	0.758347	-0.0073135	0.0145545	0.736493	0.680843	0.747854	0.814319	0.739775	0.743679	0.766046	0.748895	0.714097	0.808166	0.798248	0.632222	0.777502	0.682224	0.682025	0.613408	0.724611	0.784112	0.774717	0.746805	0.714342	0.829062	0.824814	0.739572	0.031459	0.760689	0.752092	0.001892
hp_sdrC_616	0.0035985	0.00055	0.11831	0.832039	0.336796	0.840465	0.086932	0.0788225	0.751359	0.0294985	0.014183	0.696309	0.801673	0.690273	0.695508	-0.000796	-0.0009245	0.003231	0.0541905	0.730156	0.464311	0.0316955	0.108721	0.097537	0.0593975	0.016812	0.0640735	0.334004	0.167631	0.063231	0.216831	0.183994	0.0141895	0.162859	0.094075	0.0600655	0.061829	0.014246	0.065151	0.305829	0.0268675	0.149682	0.282185	0.15984	0.106865	0.814724	0.082825	0.0908595	0.003002
hp_sdrD_611	0.0063895	-0.0019545	-0.0008975	0.0158475	0.0001155	0.076199	0.0017545	-5.1e-05	0.0090115	0.0003755	0.004531	0.029563	-0.000341	0.759215	0.0025855	-0.0041185	-0.0004065	-0.001266	0.0006065	0.0212405	0.785014	0.769048	-0.0001365	0.006365	0.004464	-0.0002255	0.002399	0.0201415	0.019603	0.003299	0.0057075	-0.0005235	-0.0027775	0.0130195	0.005035	0.0045985	-0.0023355	0.0029835	-0.001313	0.017209	0.00704	0.0350105	0.0117975	0.0142715	0.0245005	0.0094175	0.0188315	0.021836	0.0010645
hp_sdrD_612	-0.003252	0.0037415	-0.0026415	0.002803	-0.0033035	0.838607	0.836751	0.0009045	0.000458	0.81553	0.0010845	0.0103375	-0.0003335	0.022933	0.002299	0.004721	0.478238	0.187738	0.328212	0.217679	-0.0678615	0.003737	0.009692	0.0081405	0.004088	0.0048275	0.000682	0.0264025	0.0125935	0.004703	0.0105275	0.003118	0.001333	0.0079475	0.0122465	1.4e-05	0.000743	0.004276	-0.000862	0.009557	0.0058545	0.0310885	0.008005	0.0047985	0.020102	0.007761	0.005327	0.010783	0.821435
hp_sdrD_613	0.780143	-0.007043	0.830444	-0.00171	0.00247	0.018185	0.0038115	0.727361	0.0036195	-0.0022095	0.355542	0.005012	0.052298	0.0034165	-0.0029415	-0.002389	-0.003842	0.006778	-0.0003975	0.002781	-0.0183405	0.0021715	0.170155	0.100366	0.0194415	0.0267755	0.0447225	0.297196	0.135695	0.0802455	0.12877	0.133007	0.0148175	0.102835	0.165151	0.10644	0.102535	0.041193	0.0231825	0.327253	0.0316065	0.0892195	0.129628	0.117563	0.13675	0.0027875	-0.0003655	0.001197	0.002266
hp_sdrD_614	0.787073	0.0031515	0.831951	0.004709	0.000464	0.839693	0.838131	0.712975	0.001347	0.819082	0.7708	2.5e-05	0.826599	0.762582	0.0009185	6.2e-05	0.617841	0.724233	0.724079	0.663204	0.758312	0.653033	0.684297	0.746096	0.65367	0.596768	0.698206	0.793766	0.756564	0.683995	0.79404	0.816953	0.450747	0.768118	0.650471	0.691234	0.639984	0.701864	0.550471	0.778549	0.481036	0.691686	0.803789	0.792291	0.746196	4.5e-06	0.0053225	0.004514	0.56879
hp_splE_611	-0.0001405	0.007461	-0.002237	-0.0003915	0.833098	0.0011875	0.819491	0.011113	0.000846	0.792372	-0.008421	0.0056915	0.001178	0.0038545	0.0736595	0.003649	0.586516	0.453783	0.498063	0.0004595	0.0020595	-0.0069575	0.003506	0.0077105	0.0065635	0.000386	0.001296	0.016185	0.136429	0.0058025	-0.001608	3.45e-05	0.325261	0.0001865	0.0092385	-0.0007965	0.006082	-0.001399	0.0003015	0.0097445	-0.000802	0.0229495	0.0213765	0.0012055	0.017574	0.0093765	-0.00101	-0.0009475	-0.004294
hp_ssl01_611	0.0046	0.013707	-0.0012745	0.830355	0.0090335	0.0210165	-0.004151	-0.003205	0.680258	-0.008196	0.006086	0.663479	0.0080015	0.714876	0.726457	0.00458	0.0019185	0.001299	-0.003934	-0.0034815	0.037424	-0.0018455	0.012462	0.0024475	0.000758	0.002575	0.0027105	0.0288995	0.064938	-0.0007585	0.0304185	-5.55e-05	-0.0035485	-0.0038635	0.033173	-3.35e-05	0.009172	0.0149615	-0.000341	0.0005395	-0.0020775	0.005519	0.0041355	0.000181	0.003564	0.742266	0.514092	0.56675	0.719621
hp_ssl03_611	0.807616	0.0306885	0.826529	0.825514	0.114314	0.822216	0.821657	0.708803	0.658386	0.809021	0.814674	0.638123	0.789027	0.632622	0.720611	0.0032455	0.689216	0.695184	0.750857	0.700517	0.695456	0.668172	0.59958	0.668559	0.727011	0.736021	0.652341	0.697531	0.730359	0.68268	0.771486	0.729791	0.685946	0.748991	0.585286	0.643904	0.563258	0.662105	0.750612	0.743577	0.701922	0.645746	0.809023	0.79306	0.663688	0.70719	0.704846	0.708168	0.00376
hp_ssl05_611	0.492313	0.0048895	0.654326	0.84261	0.099971	0.73148	0.693907	0.547053	0.664875	-0.0019315	0.820333	0.651736	0.805288	0.666381	0.760199	0.000527	0.023734	0.104192	0.033623	0.009733	0.731213	0.697185	0.603206	0.657676	0.765041	0.702435	0.663287	0.685074	0.705807	0.663998	0.759891	0.752906	0.595444	0.743609	0.612564	0.653035	0.572566	0.675872	0.741961	0.716924	0.69714	0.640257	0.799335	0.795548	0.665492	0.729587	0.699963	0.697234	-0.00288
hp_ssl05_612	0.808615	0.0505085	0.826426	0.707442	-0.005147	0.822072	0.817863	0.735957	0.735819	0.064111	0.792258	0.703318	0.76875	0.653811	0.544918	-0.004425	0.688573	0.675517	0.700504	0.628238	0.779413	0.761691	0.624896	0.667577	0.741902	0.580611	0.669248	0.703122	0.640513	0.589415	0.724904	0.766501	0.487759	0.727273	0.604056	0.666581	0.611057	0.576596	0.683835	0.707253	0.591979	0.664146	0.784033	0.772171	0.689895	0.806757	0.78662	0.786965	0.0565005
hp_ssl06_611	-0.00481	0.0028195	0.0312195	0.0124475	0.410006	0.827964	0.817608	0.0540395	0.0758565	0.317984	0.825322	0.319489	0.001836	0.697428	-0.000232	0.0047045	0.577294	0.608049	0.651352	0.583328	-0.019653	0.0113645	0.619185	0.676185	0.769707	0.639673	0.683219	0.693117	0.676171	0.65413	0.741241	0.772665	0.520595	0.742784	0.615207	0.665541	0.590637	0.666092	0.718167	0.715424	0.679318	0.648877	0.796227	0.792	0.667725	0.121782	0.027194	0.0043645	0.0033515
hp_ssl08_611	0.813912	0.0034425	0.829716	0.851367	0.003697	0.831792	0.827017	0.726627	0.702796	0.0034465	0.824362	0.671343	0.82182	0.68854	0.771778	0.011292	0.685752	0.572799	0.739722	0.690356	0.751779	0.734943	0.59465	0.669579	0.778687	0.716809	0.688411	0.69286	0.697059	0.682346	0.733707	0.733496	0.644252	0.744134	0.588166	0.651339	0.588408	0.672819	0.74246	0.72872	0.71812	0.640101	0.809168	0.797004	0.662349	0.78259	0.714451	0.003594	0.0066665
hp_ssl09_611	0.811392	0.005893	0.831811	0.846032	0.0007445	0.839414	0.830601	0.737621	0.667139	0.813451	0.82377	0.654054	0.810391	0.740226	0.747845	0.010645	0.689311	-0.00979	0.581338	0.402498	0.763477	0.750463	0.614724	0.681369	0.782512	0.674797	0.692879	0.705612	0.681153	0.669342	0.732855	0.744307	0.610268	0.73409	0.618953	0.661286	0.594039	0.671544	0.721064	0.722831	0.685348	0.647295	0.80296	0.795395	0.673023	0.76013	0.777274	-0.004839	0.0022645
hp_ssl10_611	0.0993855	0.011233	0.241866	0.845645	0.047214	0.401655	0.299608	0.182937	0.663757	0.334902	0.822986	0.673149	0.80906	0.182837	0.740424	0.0053785	0.014041	0.001243	0.0199735	0.010426	0.437315	0.137452	0.595791	0.657811	0.765325	0.75957	0.660512	0.700962	0.705202	0.706232	0.71971	0.714535	0.718284	0.725053	0.569586	0.642207	0.583163	0.646729	0.758366	0.732569	0.712042	0.627788	0.80452	0.799489	0.653069	0.745799	0.459893	0.740526	0.007949
hp_sspA_611	0.813283	-0.003865	0.836407	0.847319	0.837235	0.838098	0.827135	0.727774	0.656186	0.757259	0.829921	0.664751	0.813618	0.699984	0.761416	0.006856	0.700241	0.771632	0.776167	0.774995	0.753459	0.713911	0.598261	0.66	0.773613	0.712878	0.658481	0.700639	0.694024	0.695019	0.735087	0.732052	0.644484	0.729864	0.576892	0.635277	0.572704	0.636692	0.745404	0.732062	0.715555	0.624999	0.808269	0.80832	0.65876	0.745765	0.737124	0.713503	0.783642
hp_sspB_611	0.778774	0.004071	0.82555	0.84505	0.820362	0.82769	0.814549	0.702732	0.650004	0.761098	0.773992	0.654979	0.752637	0.691885	0.756859	0.0064555	0.656718	0.734472	0.692748	0.68142	0.742701	0.703766	0.626359	0.682132	0.702742	0.509357	0.635987	0.72871	0.647804	0.569954	0.713834	0.737807	0.475183	0.719147	0.602866	0.65081	0.588303	0.588029	0.67953	0.730347	0.660802	0.657763	0.788546	0.785311	0.683261	0.752947	0.732687	0.714945	0.784401
hp_sspB_612	0.797799	-0.0038945	0.829139	0.840683	0.824537	0.824258	0.8263	0.705485	0.650923	0.775845	0.832893	0.671196	0.806052	0.681718	0.761451	0.0136275	0.679485	0.784511	0.747227	0.771993	0.723267	0.69473	0.624289	0.677766	0.779212	0.699532	0.662751	0.711259	0.712566	0.695244	0.743885	0.768666	0.65237	0.732581	0.593092	0.663358	0.547821	0.634686	0.734985	0.730583	0.729204	0.631781	0.815326	0.810638	0.65379	0.75841	0.726925	0.729993	0.777792
hp_sspP_611	0.794442	0.0124655	0.813112	0.773783	0.824716	0.826124	0.817701	0.708184	0.652624	0.743453	0.821406	0.643836	0.803959	0.674837	0.745851	0.009893	0.674894	0.733328	0.750188	0.731633	0.71593	0.721831	0.641853	0.714738	0.795828	0.734899	0.565252	0.738453	0.706372	0.710866	0.400374	0.789127	0.657784	0.740086	0.607356	0.667425	0.579144	0.671253	0.750387	0.737005	0.730053	0.661996	0.816404	0.816327	0.677326	0.769056	0.730434	0.751055	0.823202
hp_sspP_612	0.744846	0.011072	0.786431	0.833437	0.821494	0.820472	0.818972	0.690739	0.652239	0.75385	0.807689	0.630345	0.786118	0.641575	0.732756	0.0043345	0.639393	0.598688	0.645343	0.601453	0.707583	0.707021	0.634548	0.705513	0.799878	0.678528	0.678243	0.738272	0.706498	0.684403	0.77847	0.79008	0.574078	0.755739	0.617238	0.663458	0.589277	0.6813	0.735665	0.746018	0.723502	0.671879	0.820874	0.81693	0.675844	0.754491	0.692754	0.711616	0.822965
hp_tetEfflux_611	0.753304	0.002742	0.792033	0.81926	0.83571	0.83577	0.840869	0.72746	0.654224	0.808229	0.825501	0.646508	0.822726	0.67726	0.729167	0.0091425	0.671407	0.576411	0.642729	0.57668	0.742931	0.715167	0.658701	0.735817	0.813449	0.711506	0.727062	0.765044	0.731717	0.713488	0.789511	0.817479	0.583614	0.787089	0.640336	0.704085	0.623621	0.719111	0.757142	0.778614	0.742021	0.709574	0.829595	0.812975	0.71884	0.760303	0.738714	0.757801	0.831862
hp_tst_611	0.7614	0.0204225	0.798415	0.843438	0.038838	0.0900545	0.068308	0.0097965	0.66784	0.034907	0.846164	0.0831415	-0.001481	0.027909	0.747778	0.0028035	0.000901	0.007402	-0.003073	0.000769	0.0011825	0.684442	0.061914	0.023707	0.0163425	0.003915	0.0167665	0.0599075	0.0892765	0.0418365	0.069827	0.0429095	0.025645	0.05887	0.061861	0.0242395	0.14637	0.004004	0.003947	0.041976	0.0052185	0.0684755	0.0614035	0.068933	0.069814	0.766822	0.016809	0.073073	0.0189165
hp_ugpQ_611	0.770145	0.0097975	0.807818	0.016695	0.82665	0.0043535	0.00576	0.707966	0.0447235	0.775548	0.0039255	0.0502165	0.785421	0.683953	-0.001614	0.735148	0.69869	0.738154	0.765196	0.743625	0.672961	0.69033	0.0062725	0.020155	0.0080935	0.0025205	0.010221	0.0431395	0.058993	0.024051	0.0384015	0.016338	-0.000822	0.043888	8.2e-05	0.007045	0.0363355	-0.000645	0.0096775	0.034365	0.0111905	0.0654115	0.0240065	0.0504105	0.0436975	0.087109	0.0260955	0.0240575	0.011837
hp_vraS_612	0.797319	0.0307585	0.832235	0.848818	0.831198	0.840066	0.842853	0.723476	0.685887	0.802017	0.856935	0.680125	0.842276	0.710449	0.78925	0.006712	0.690387	0.786261	0.778172	0.773066	0.719648	0.720708	0.688265	0.758131	0.840524	0.759557	0.765362	0.546757	0.751588	0.743614	0.803868	0.817444	0.616059	0.792091	0.68542	0.733664	0.642455	0.743648	0.780787	0.781963	0.757774	0.71723	0.845938	0.809393	0.746557	0.78652	0.779093	0.790551	0.824642
hp_vwb_611	0.00389	0.0125835	0.002786	0.848651	0.0006985	0.0027675	-0.0017965	-0.005487	0.69335	-0.0035055	0.0029505	0.673764	-0.001964	0.0017465	0.785674	-0.005225	0.007093	0.002349	0.0106325	-0.0071945	-0.005814	0.0185015	0.00645	-0.0009635	0.0033635	0.0042835	-0.0007875	0.001037	0.0030345	-0.001349	0.0033205	0.0005635	0.00034	0.0033465	0.0044095	0.0028835	0.0053	-0.000982	-0.000872	0.0073305	2.8e-05	0.0014285	0.0046815	0.0041075	0.0020805	0.777304	0.015728	0.0019025	0.003464
hp_vwb_612	-0.002164	0.0326395	-0.0019095	0.0728915	0.011624	0.842623	0.841639	-0.000802	0.019351	0.804833	-0.001351	0.0556345	0.0056825	0.0060305	0.0052865	0.0058655	0.671739	0.568513	0.687226	0.571125	0.020292	-0.000828	0.668517	0.742833	0.815446	0.710875	0.727793	0.769257	0.736003	0.715804	0.389572	0.793262	0.605187	0.769191	0.666802	0.705321	0.620918	0.710193	0.757456	0.772616	0.728502	0.711858	0.824305	0.809605	0.733695	0.0703755	-0.005149	-0.0017925	0.006586
hp_vwb_613	-0.0049225	0.0029495	-0.0005455	0.0288795	0.837974	0.0013945	0.0014395	0.001109	-0.001384	0.00804	-0.0048445	0.011378	8.25e-05	0.743826	0.006921	0.0043175	-0.0029955	-0.000941	0.0007265	0.019615	0.00944	0.009161	0.012828	0.0035155	-0.001028	0.001942	0.002238	0.007076	0.000235	0.003546	0.0010185	0.005517	0.0003705	0.0055685	0.0241815	-0.000449	-0.001029	0.004365	0.000607	0.001725	0.003186	0.012343	0.0011615	0.005078	-0.0011525	0.0002015	-9.75e-05	0.0093715	0.006221
hp_vwb_614	0.797349	-0.0017095	0.827464	0.0213065	0.0002825	0.0022565	-0.004275	0.728425	-0.000838	-0.001535	0.0090025	0.0063445	0.0064205	-0.005081	-0.002756	-5.85e-05	0.001706	-0.00236	-0.003553	-0.004101	-0.013258	0.721914	0.068351	-0.0018895	-0.001875	-6.1e-05	-0.0018525	-0.002951	0.0027055	-0.002614	0.0015015	-0.010047	0.0032605	-0.0012255	0.070594	-0.0006845	-1.3e-05	0.0034635	0.004439	-0.001846	0.002523	0.00582	-0.0032595	0.000573	0.0038905	-0.004377	0.0057625	0.017409	0.0025
hp_vwb_615	0.776928	-0.0018735	0.814029	0.859113	0.82692	0.844337	0.848838	0.70975	0.708843	0.826323	0.852302	0.703639	0.838865	0.675921	0.766172	0.0080305	0.711086	0.749955	0.781994	0.751379	0.650697	0.686438	0.672834	0.767414	0.819545	0.713379	0.75428	0.7831	0.778409	0.751743	0.820361	0.802777	0.646971	0.801317	0.661609	0.714879	0.637342	0.756952	0.810593	0.79907	0.775956	0.733291	0.840052	0.826502	0.745756	0.79452	0.776871	0.776344	0.80894
hp_xylR_611	0.78737	0.0416425	0.831077	0.035049	0.836794	0.0061005	0.000258	0.002194	0.031502	0.0325115	-0.00181	0.0527385	-0.0029705	0.0268945	0.0038575	0.732411	0.0034305	-0.001727	0.0114075	0.0152615	-0.0017875	0.008431	0.085909	0.03095	0.004597	0.002094	0.010594	0.1523	0.041055	0.0135375	0.12308	0.0304805	0.017039	0.050037	0.102932	0.143796	0.079936	0.0102225	0.0187095	0.160059	-0.000335	0.0370855	0.0872575	0.021187	0.0299365	0.0822595	0.011232	0.015888	-9.5e-05
katA_11	0.794006	0.0103925	0.813754	0.8169	0.824467	0.813053	0.820555	0.715584	0.690898	0.76923	0.812999	0.660394	0.787135	0.721415	0.755195	0.006388	0.573485	0.571762	0.660837	0.599865	0.724836	0.733569	0.657315	0.719973	0.765965	0.58153	0.707088	0.734862	0.711606	0.656092	0.767959	0.771391	0.442636	0.745529	0.617318	0.678419	0.583625	0.678109	0.731357	0.744101	0.691768	0.696632	0.796825	0.78875	0.70743	0.78056	0.76623	0.766738	0.817426
linA-19,2	0.006263	0.020821	0.0772015	0.0199405	0.026216	0.022778	0.0072105	0.016578	0.003494	-0.003	-0.005437	0.004381	0.002982	0.048777	0.0002305	0.008547	0.0080625	-0.0052805	0.000986	0.004283	0.042581	0.032922	0.053902	0.0236655	0.006218	0.003188	0.0132665	0.0835935	0.0591955	0.0122505	0.0662485	0.0250285	-0.0010785	0.025884	0.0769685	0.038629	0.04947	0.0395045	0.004343	0.0455345	0.007054	0.0590785	0.022314	0.0383085	0.027866	0.0110785	0.0044205	-0.0017875	-0.001139
linA-19,3	0.005183	0.009792	0.0033125	0.0158505	-0.0038225	-0.0022545	-0.001233	0.006876	0.0019485	-0.002226	-0.006203	0.003559	0.0009345	0.015252	0.021003	0.0038205	0.001581	0.0036005	-0.002064	-0.0134465	0.0002345	0.0043215	-0.004099	0.0045355	-0.0013425	0.001897	0.001854	0.004748	0.003078	0.002774	-0.0031275	-0.0030205	0.009927	0.003142	0.0004995	0.0019765	-0.0004645	0.00271	0.000523	-0.0011925	0.00428	0.0129425	0.0043645	-0.003228	0.006573	-0.000777	-0.001157	0.0014765	0.0035885
lukD_11	0.766202	0.0295555	0.822867	0.316331	-0.0016825	0.827703	0.833167	0.736816	0.675763	0.818983	0.83094	0.666384	-0.02555	-0.0032565	0.75063	0.00325	0.655125	0.708985	0.717723	0.669307	0.001031	0.733468	0.674242	0.727837	0.4443	0.042285	0.101946	0.77769	0.680114	0.533717	0.770485	0.765182	0.244314	0.747681	0.199703	0.728444	0.649514	0.723186	0.306025	0.779989	0.326896	0.57089	0.764109	0.757273	0.738588	0.777724	0.784765	0.760873	0.160084
lukE_11	0.746905	0.0155355	0.822043	0.831997	0.001427	0.816807	0.824457	0.735112	0.723199	0.799878	0.074585	0.692875	0.0004635	0.0036795	0.736734	-0.0008215	0.533446	0.616376	0.731501	0.707822	-0.003073	0.738043	0.669868	0.720771	0.794562	0.513147	0.727823	0.774879	0.68688	0.636378	0.761755	0.70833	0.474424	0.760552	0.661185	0.711222	0.641814	0.702004	0.733773	0.75073	0.720663	0.728996	0.808604	0.800302	0.730225	0.796442	0.674856	0.772594	0.0034715
lukF-PV-P83_11	0.004879	0.0021865	0.0281545	0.836291	-0.0014575	0.054895	0.031751	0.012304	0.733333	0.0317235	0.842616	0.71368	-0.0075585	0.001782	0.764423	0.0031575	-0.002251	0.0012355	-0.00037	0.00318	-0.0026955	0.0365375	0.0056555	0.0192815	0.007741	-0.00337	0.0122245	0.0570815	0.0354655	0.0029505	0.0299235	0.080037	0.001807	0.024629	0.019639	0.023425	0.015388	0.0093985	0.005078	0.067385	0.0059075	0.0233005	0.0315905	0.0129195	0.0180055	0.802985	0.778452	0.766833	0.0485755
lukF-PV_10	0.0048145	0.01239	0.001124	0.004903	-0.0023835	0.002732	-0.0013675	0.718023	0.003823	0.002557	-6.25e-05	0.0021855	0.0030635	0.002989	-0.0007035	0.006793	0.403548	0.597055	0.552118	0.3883	0.793241	0.0032905	0.0088165	0.736473	0.0059245	0.458813	0.722735	0.782236	0.713611	0.645177	0.754714	0.737216	0.412994	0.770903	0.635952	0.725197	0.648072	0.688223	0.743439	0.773578	0.693793	0.012908	0.812329	0.794998	0.772539	0.012353	0.0067745	0.0042445	0.824736
lukF_10	0.793002	-0.000751	0.817748	0.836267	0.825519	0.840634	0.829314	0.720723	0.706077	0.788201	0.836975	0.685337	0.820393	0.734527	0.768991	0.005459	0.622683	0.709996	0.753119	0.742282	0.779504	0.757449	0.657044	0.720295	0.79911	0.512265	0.729351	0.782618	0.705783	0.698461	0.757721	0.780817	0.45887	0.769653	0.640663	0.705951	0.617908	0.709628	0.734266	0.757177	0.739833	0.710664	0.830408	0.807638	0.745004	0.807005	0.779876	0.788973	0.708174
lukM_11	0.0004675	0.006277	-0.001699	0.847928	0.000575	-0.006356	0.001367	-0.0005065	0.692823	0.000236	0.836841	0.686813	-0.015157	0.0055935	0.777873	0.005431	-0.0001625	0.0007055	-0.0067825	0.0019645	0.0110005	-0.0023575	0.0071925	0.0021555	0.001469	-0.000134	0.005389	0.005151	0.0137525	0.003551	0.0043075	-0.0005865	0.002138	7.4e-05	0.016631	4.8e-05	0.0024235	0.000166	0.0003215	0.0015015	0.00128	0.0114075	-0.0018165	-3.05e-05	0.0021625	0.769239	0.768996	0.747623	0.000356
lukS-PV_20	0.003876	0.0032415	0.0016955	0.016838	-0.002074	0.0098865	-0.000279	0.733974	0.005077	-0.0029505	-0.0022275	0.017214	0.003703	0.004093	0.000807	0.0015355	0.576118	0.617887	0.580305	0.483034	0.77744	0.0042295	0.0231085	0.759366	0.005699	0.531524	0.754885	0.793926	0.756583	0.684334	0.804517	0.811748	0.480989	0.795194	0.663647	0.736644	0.650561	0.748236	0.752486	0.789144	0.737915	0.024706	0.825176	0.816835	0.769394	0.007178	0.005022	0.0027275	0.839854
lukS_10	0.78662	-0.0008585	0.829935	0.839376	0.826037	0.83843	0.839651	0.734881	0.678215	0.81684	0.834997	0.674144	0.829062	0.683455	0.774269	0.004372	0.656502	0.570215	0.596617	0.469027	0.769551	0.745532	0.61453	0.708231	0.79106	0.622802	0.723406	0.743451	0.725172	0.693526	0.769626	0.790338	0.579986	0.745583	0.591089	0.657293	0.561772	0.680324	0.759663	0.73235	0.730146	0.680898	0.830218	0.798392	0.693205	0.7825	0.763389	0.770575	0.0020275
lukX_11	0.730858	-0.0061095	0.771157	0.785609	0.799582	0.806204	0.793349	0.668122	0.726302	0.780485	0.78947	0.682398	0.725427	0.744628	0.70982	0.016455	0.30458	0.299041	0.572045	0.516823	0.757545	0.751156	0.543782	0.621635	0.703755	0.466391	0.644966	0.644429	0.604558	0.468128	0.525821	0.651553	0.228954	0.665946	0.58818	0.595406	0.566079	0.479974	0.596763	0.721626	0.556228	0.689657	0.681634	0.689962	0.667309	0.803277	0.787786	0.786509	0.060113
lukY-var1_11	0.765451	0.0296615	0.803936	0.828115	-0.0007285	0.829705	0.817624	0.696443	0.70371	0.789459	0.812154	0.655207	0.656394	0.726029	0.756026	0.0028865	0.49438	0.613208	0.641047	0.623329	0.770981	0.748335	0.696851	0.745707	0.78761	0.581193	0.731977	0.777639	0.749147	0.698483	0.739802	0.785656	0.507668	0.776273	0.653538	0.698315	0.624574	0.727796	0.312532	0.762239	0.694837	0.737465	0.814037	0.804913	0.750412	0.78818	0.780971	0.796917	0.786834
lukY-var2_11	-0.00449	0.013179	-0.0019705	0.016018	0.820639	0.0023495	-0.0010955	-0.003517	-0.0006705	-0.0005445	-0.003617	0.008873	-0.0029405	0.0018665	-0.005106	0.003378	-0.0002235	-0.006042	-0.0061865	-0.0017935	-0.0173275	0.0042825	0.0007355	0.0024045	-0.000967	0.0035425	0.0045315	0.013694	0.0053195	0.00158	0.008741	0.001829	0.000225	0.002676	0.0048565	-0.002103	0.0027635	0.0021195	-0.0027125	0.0014815	0.003509	0.0136385	0.001093	0.0033105	0.0341745	-0.001027	7.15e-05	0.003404	0.001811
mecA-1,4	0.798615	0.000123	0.804006	0.0460555	0.819693	0.001872	0.0040615	0.730388	0.014088	0.819991	0.0024	0.0003815	0.807851	0.721288	0.000525	0.434381	0.594391	0.545368	0.624516	0.480279	0.767219	0.727134	0.021366	0.0082095	0.010965	-0.000149	0.0120635	0.0201645	0.0157355	-0.000605	0.0005485	0.012803	0.0007585	0.006315	0.022639	0.004355	0.0050155	0.000908	-0.004481	0.000931	0.0019175	0.027843	0.003033	0.0026065	0.0159515	0.0017875	0.009601	0.0236135	-0.000437
mecA_11	0.791982	-0.0021225	0.822905	0.008458	0.834455	0.003011	-0.0026185	0.747413	0.0063535	0.832247	-0.0004825	-0.000154	0.829955	0.73083	0.0105015	0.689146	0.66606	0.734042	0.776433	0.763392	0.75816	0.715391	0.0129165	0.000744	0.005733	0.007508	0.0033035	0.00248	0.003922	-0.001631	0.000493	0.016557	-0.002374	0.0008055	0.0152525	-0.002558	0.003214	0.005271	0.000643	-7.45e-05	0.0022855	0.0158725	0.000448	0.016712	0.0080615	0.0023545	0.011566	-0.001857	0.0021375
probe_coa_consens_11	0.764943	0.006242	0.812491	0.798269	0.827584	0.822391	0.813171	0.715779	0.70668	0.784814	0.797332	0.657593	0.770074	0.735802	0.725996	0.010292	0.530203	0.394627	0.49912	0.368142	0.76037	0.738587	0.66417	0.718996	0.760091	0.527278	0.703655	0.731024	0.717629	0.656452	0.773111	0.782358	0.405042	0.7591	0.624297	0.697042	0.591444	0.685747	0.718308	0.746839	0.670305	0.70793	0.799632	0.786269	0.712201	0.783808	0.775791	0.775933	0.822057
proteinA_12	0.798473	0.0163855	0.82628	0.824101	0.833576	0.828682	0.82619	0.731715	0.698743	0.814614	0.825985	0.674195	0.806277	0.728574	0.739703	0.0111595	0.609301	0.655925	0.772294	0.767899	0.758041	0.727845	0.645084	0.717638	0.760193	0.562822	0.696986	0.724574	0.710984	0.67901	0.760314	0.77394	0.485231	0.760983	0.605263	0.66942	0.571114	0.667339	0.751798	0.728069	0.691412	0.698718	0.806411	0.792142	0.688669	0.797422	0.785583	0.784853	0.80369
s_aur_rrn_1_pm	0.814022	0.848202	0.839185	0.839881	0.842723	0.841137	0.840676	0.747962	0.697396	0.827197	0.836214	0.681262	0.822659	0.712138	0.748431	0.003858	0.706873	0.710981	0.791643	0.789419	0.749186	0.694765	0.691761	0.743621	0.790331	0.75033	0.728776	0.770803	0.780085	0.738042	0.802336	0.787672	0.721588	0.791681	0.653126	0.684101	0.617622	0.686751	0.788053	0.784479	0.742153	0.716454	0.832925	0.812673	0.728806	0.770881	0.750892	0.760125	0.744865
sak_11	0.7951	0.0008155	0.815881	0.0257915	0.823786	0.824952	0.816374	0.734176	0.0396095	0.0004865	0.0055755	0.0624535	0.812087	0.184871	0.0003975	0.0091435	0.633403	0.516852	0.65467	0.592902	0.010482	0.721747	0.640628	0.712836	0.770089	0.534763	0.706187	0.717003	0.704539	0.545937	0.75412	0.77386	0.494374	0.747426	0.605359	0.670374	0.576134	0.675536	0.738072	0.735951	0.700525	0.681132	0.803113	0.799103	0.661702	0.021075	0.004498	0.021899	0.82051
sat-17,2	0.007562	-0.0011945	0.0001855	0.0092	0.0027345	-0.0011545	0.001765	0.014512	0.0011055	0.000244	0.004678	-0.0044215	0.003313	-0.0004015	0.00048	0.590072	0.657755	-0.0020445	0.000562	0.0024765	0.775005	-0.0020845	-0.0020155	0.006528	-0.0039685	0.0031875	0.0037125	0.005053	0.004944	0.00254	0.005596	0.002325	-0.0029165	0.000396	0.0039165	0.017427	0.001144	0.048837	0.004544	-0.002155	0.0002335	0.0184685	-0.0002455	0.0450995	0.0172435	-0.0033725	-0.001265	0.0152215	0.0021695
sat-17,3	0.000498	0.044558	0.0020495	0.004701	0.0045045	0.000779	0.003118	-0.001353	0.0015545	0.024695	0.0034355	-0.0054355	0.002015	0.00473	-0.002485	0.680669	0.68142	0.0006565	-0.0037325	0.004453	0.778419	0.0032285	0.0137925	0.0045515	0.005051	-0.0009445	0.005544	0.005646	0.0095815	-0.00174	0.011391	0.0062305	-0.00288	-0.002012	0.021776	0.001725	0.0028455	-0.000237	0.004285	-0.001476	0.005314	0.0216885	-0.0017855	-0.002115	0.0092555	0.0009115	-0.003	0.0019225	0.0035375
sbi-var1_11	0.804888	0.0063265	0.826307	0.831674	0.835818	0.832967	0.823741	0.735617	0.701304	0.811878	0.828516	0.686593	0.820895	0.685382	0.777857	0.0070115	0.615366	0.537498	0.696622	0.537633	0.568987	0.724865	0.65771	0.723795	0.77927	0.609527	0.711266	0.72601	0.709398	0.690899	0.772242	0.784922	0.466194	0.764525	0.620575	0.66967	0.567851	0.682736	0.759577	0.747826	0.727545	0.679042	0.82013	0.813583	0.652543	0.773536	0.785859	0.802893	0.818261
sbi-var1_12	0.788096	-0.0031775	0.83446	0.816528	0.838631	0.835988	0.825701	0.719847	0.72093	0.798789	0.813376	0.702338	0.802609	0.72911	0.733428	0.011086	0.595473	0.546771	0.626388	0.524551	0.760031	0.736632	0.674684	0.738515	0.771417	0.556215	0.710061	0.759977	0.712264	0.683775	0.773886	0.782659	0.463753	0.766958	0.627415	0.687963	0.597575	0.705993	0.71893	0.756002	0.69494	0.720091	0.811207	0.811277	0.690631	0.809476	0.799451	0.804323	0.0475385
set-SAR0424_11	-0.001195	0.0021405	0.002726	-0.001073	0.835435	-0.001427	0.0021965	0.0001315	0.005279	-0.0005015	-0.000415	0.007174	0.001209	0.0042445	0.004417	0.0132555	0.0081095	0.0281175	-0.007122	-0.0014875	0.004456	0.0021705	0.0082475	0.0025275	0.003725	-0.003156	0.005754	0.0170135	0.007884	0.0004675	0.0028895	0.0044655	-0.000773	0.0059505	0.0051365	0.007233	0.010139	0.005223	-0.0026325	0.0054475	0.0015115	0.0135605	0.003177	-0.0023855	0.0093665	0.0016325	-0.0002275	0.013217	0.0096045
set-SAR0425_11	0.001234	0.0277635	0.0132245	0.0047665	0.832602	0.012178	0.007945	0.0139895	0.0027345	0.005943	0.0053555	0.0162975	0.002649	0.027787	0.006181	0.012122	0.001161	-0.001058	0.0012125	0.0087905	0.0094695	0.009866	0.057913	0.010684	0.012595	0.000698	0.0121015	0.043733	0.027346	0.004354	0.013929	0.011548	0.0024535	0.0100075	0.0657985	0.016933	0.021671	0.011031	0.00308	0.019074	0.006954	0.0327945	0.007201	0.005248	0.0216675	0.0214055	0.0146975	0.0205775	2.85e-05
set-SAR0425_12	0.0053895	-0.001374	0.417785	0.037956	0.83037	0.353727	0.250891	0.295747	0.0795505	0.122989	0.121417	0.181869	0.122894	0.33993	0.0002485	0.005829	0.013296	0.0105345	-0.0062615	-0.002928	0.344835	0.179235	0.48599	0.251181	0.257231	0.0221495	0.279122	0.576151	0.454499	0.226414	0.273292	0.597487	0.10028	0.296164	0.38026	0.336064	0.392888	0.221065	0.030569	0.582425	0.0581975	0.170075	0.434836	0.306227	0.207574	0.308472	0.123289	0.399394	0.0028995
set1-var1_11	0.59525	-0.0014625	0.727644	0.617152	0.840216	0.806766	0.762003	0.564115	0.673926	-0.0038795	0.370688	0.681437	0.664744	0.691592	0.389059	0.012028	0.0316975	0.068976	0.148568	0.095154	0.086283	0.614472	0.507263	0.379873	0.469285	0.0609735	0.429511	0.585598	0.322447	0.244615	0.445861	0.587041	0.0626805	0.395508	0.42052	0.39318	0.34956	0.220878	0.224765	0.542507	0.113676	0.287575	0.54594	0.394022	0.289058	0.772817	0.653126	-0.00068	0.0086985
set1-var2_11	0.125908	0.004628	0.321616	0.168848	0.307544	0.545871	0.397002	0.210415	0.208685	-0.001774	0.0462455	0.232783	0.177753	0.273163	0.0115555	0.000557	0.0084905	0.015001	0.0357725	0.028912	0.156579	0.164054	0.081301	0.017469	0.032565	0.0006895	0.035773	0.0962255	0.06696	0.010086	0.0528495	0.0993515	0.0063495	0.0319205	0.06603	0.0328725	0.023936	0.0112	0.0054215	0.063564	0.0092265	0.0294725	0.066188	0.035259	0.019624	0.437293	0.200975	0.0057345	0.0017
set1-var4_11	0.806034	0.0062145	0.826654	0.831133	0.253166	0.828981	0.832172	0.723765	0.685353	0.0008865	0.804441	0.655744	0.822685	0.706327	0.756992	0.002402	0.630099	0.691982	0.75865	0.736069	0.758876	0.744554	0.656613	0.677916	0.71424	0.418996	0.669085	0.732518	0.646765	0.592346	0.716091	0.763172	0.267634	0.701276	0.573183	0.656875	0.602629	0.65513	0.587892	0.716517	0.537693	0.665457	0.73141	0.717994	0.697431	0.759893	0.760144	-0.0009905	0.0017405
set12_11	0.794266	0.0028145	0.820576	0.757888	0.003732	0.822588	0.812768	0.704694	0.418415	-0.001628	0.815478	0.695347	0.808391	0.665436	0.529465	0.0053855	0.647815	0.656146	0.704994	0.654205	0.748928	0.716074	0.6097	0.710351	0.755308	0.549323	0.674185	0.705542	0.6929	0.62739	0.721189	0.774042	0.51245	0.717827	0.568421	0.658705	0.567732	0.661991	0.688088	0.701736	0.606352	0.674452	0.778536	0.754776	0.710428	0.760758	0.414647	0.005057	0.00156
set2-var1_11	0.009887	0.006355	0.0068005	0.838488	-0.000623	0.832758	0.0023935	0.022009	0.674961	-0.002875	-0.0006655	0.654583	-0.001251	0.0045065	0.755311	0.006589	0.001524	-0.0017995	0.0027745	0.661952	0.0016665	0.0069305	0.138614	0.0092375	0.0458005	0.0003155	0.020952	0.209921	0.217612	0.0187485	0.16954	0.099111	0.015179	0.0529295	0.182178	0.033275	0.063775	0.0113245	0.001545	0.0815915	0.0126785	0.0483035	0.0525035	0.0493535	0.0209695	0.736436	0.0024035	0.006251	0.002502
set2-var2_11	-0.0018055	0.031207	-0.0012825	0.011684	0.834958	0.0047195	0.000347	0.000349	0.00453	-0.001612	0.002325	0.024193	0.000869	0.004602	0.001701	0.0012995	0.002707	-0.006768	-0.0008465	0.02502	0.003316	0.0014155	-0.0011115	0.0029395	0.003953	-0.0010105	-0.000688	0.0039055	0.0014025	0.0043935	0.0023355	0.0013335	0.002422	-0.002564	0.0051865	-0.005954	0.000618	0.006801	-0.001051	-0.003682	0.001092	0.009687	-0.0047525	-0.0023965	0.007365	0.011834	0.0003145	-0.0016095	0.002185
set2-var3_11	0.782911	-0.000282	0.823219	0.0254845	-0.0016365	0.0139965	-0.0022765	0.73536	-6.65e-05	-0.000277	0.0024595	0.0056335	-0.01027	-0.0010485	-0.004086	0.006734	-0.0033835	-0.000734	-0.0046775	0.002858	-0.0022125	-0.0029625	0.0117995	0.005042	-0.001632	0.000385	0.001817	0.003599	0.0063125	0.002327	-0.0052785	-0.0001785	-0.002031	0.0007015	0.0127725	0.0043245	-0.002581	-0.002541	-0.001248	-0.001408	0.004331	0.0081325	0.000651	-0.0012035	0.0052265	0.00493	-0.0045155	-0.0041355	0.004135
set2-var4_11	-0.002844	0.0320795	-0.000305	-0.0031145	0.000357	-0.001634	0.827555	0.010762	-0.001983	0.807964	0.001222	-0.000197	0.000654	0.004832	-0.000895	0.004012	0.663233	0.698179	0.76319	0.0084555	0.0086765	-0.0040485	-0.0013375	-0.0012235	0.001066	0.001416	-0.001327	0.003558	0.003189	-0.0026755	-0.002043	0.0088415	-0.0033045	-0.00165	0.0040385	-0.001528	-0.0011425	-0.0016375	-0.0014145	0.0010455	-0.000873	0.0111755	0.0011655	-0.0034975	0.0002935	0.0012955	-0.0003695	0.0003485	0.0024355
set21_11	-0.003094	0.0215195	0.0011915	0.00212	0.02954	0.823658	0.818102	0.0013165	0.0088175	-0.0011365	0.785882	0.0115765	0.0049495	0.689855	-0.0036395	-0.003808	0.540974	0.0052115	0.614158	0.523292	-0.0014355	0.0020785	0.603251	0.003354	0.739858	0.503374	0.663913	0.711998	0.693105	0.628493	0.742705	0.775722	0.431717	0.729105	0.571364	0.671993	0.584839	0.667898	0.671415	0.713796	0.591589	0.68321	0.776202	0.766231	0.0043625	-0.002832	0.001521	0.001754	-0.000748
set3-var1_11	0.798216	-0.001605	0.824276	0.00148	-0.001976	0.826421	0.826964	0.699645	0.000722	0.004066	0.0011995	0.0118115	0.828183	0.0021025	-0.0023065	-0.000539	0.629261	0.658008	0.735285	0.711468	0.772333	0.73012	0.0123825	0.000453	0.002515	-0.0062435	0.001112	0.010931	0.0068195	0.000836	0.0023405	0.0028675	0.0001055	0.0028035	0.008057	0.0013985	0.006184	-0.0023685	0.0022745	-0.001399	0.0009475	0.0124645	0.002003	0.000245	-0.004018	0.003466	-0.00071	0.004316	0.004977
set3-var2_11	0.0084605	0.0108495	0.0009935	0.02396	0.823547	-0.0009685	-0.00088	0.0028225	0.03582	0.000733	0.125622	0.058257	0.049805	0.0150655	-0.004434	0.0086995	-0.001068	-0.0088625	0.002233	-0.0027155	0.126643	0.06411	0.0991905	0.0610035	0.055709	0.013896	0.0604425	0.179734	0.106847	0.0398865	0.135045	0.135227	0.014455	0.074154	0.058514	0.120764	0.155954	0.0493245	0.0195035	0.174194	0.0145935	0.060614	0.127891	0.0740195	0.0629065	0.121233	0.151309	0.210357	0.0010535
set4-var1_11	0.814423	0.00071	0.838475	0.646144	0.794737	0.833951	0.843723	0.706859	0.65183	0.802925	0.814633	0.689852	0.775048	0.71226	0.334708	-0.001237	0.692415	0.694486	0.781101	0.776006	0.749168	0.698681	0.6579	0.731332	0.79319	0.625528	0.726835	0.75695	0.725158	0.686855	0.771759	0.781745	0.624882	0.769101	0.61853	0.69898	0.622325	0.710494	0.735237	0.75666	0.668027	0.70551	0.804858	0.786385	0.726608	0.735401	0.09107	0.76219	0.493574
set4-var2_11	0.303118	-0.0017915	0.380126	0.127369	0.83069	0.557875	0.430748	0.279052	0.0554895	0.245057	0.035774	0.122829	0.0061635	0.549516	0.0051635	0.024645	0.0604865	-0.001167	0.081644	0.075076	0.522938	0.564945	0.521996	0.283285	0.248685	0.0140615	0.173347	0.577893	0.46048	0.349204	0.45456	0.423888	0.0868575	0.313793	0.396153	0.504008	0.452997	0.132031	0.0862665	0.420283	0.067572	0.209233	0.314061	0.28062	0.19905	0.116133	-0.0005095	-0.0063215	0.051571
set5-var1_11	0.786547	0.0211155	0.828013	0.818532	-0.002503	0.834682	0.837436	0.71812	0.726866	0.797158	0.829414	0.688133	0.81683	0.710079	0.710926	0.007683	0.607865	0.566304	0.431164	0.267406	0.777507	0.753629	0.702613	0.762014	0.786366	0.527581	0.728892	0.795855	0.749715	0.712822	0.810447	0.80071	0.506165	0.789676	0.653149	0.711732	0.640158	0.745849	0.750345	0.77879	0.71715	0.738905	0.825175	0.81537	0.756198	0.813708	0.799972	0.0071665	0.0017845
set5-var2_11	0.0007915	0.002154	0.0024645	0.040628	0.823273	0.028915	0.0039535	0.0255075	0.0086175	0.0009175	0.0005805	0.0215535	0.001012	0.0441975	0.0083235	0.007579	0.005571	-0.0014865	0.0046025	-0.002446	0.0136455	0.0140665	0.019202	0.0029135	0.005517	0.0009825	0.004472	0.018297	0.0200235	0.0050605	0.005557	0.006589	0.00625	0.007533	0.0216415	0.004162	0.008408	0.001562	0.002037	0.0105095	0.0013465	0.016623	0.001469	0.005434	0.008119	0.00797	0.025475	0.001873	0.002602
set6-var1_11	0.808985	-0.0027495	0.837844	0.0339945	0.0043995	0.0153985	0.842685	0.71208	0.0062705	0.817619	0.001658	0.016091	0.812859	0.141084	-0.0024635	-0.000313	0.689641	0.701543	0.774471	0.002035	0.737624	0.019364	0.651477	0.735298	0.786886	0.661238	0.716492	0.769394	0.749635	0.695249	0.788452	0.771667	0.513889	0.765211	0.615506	0.657251	0.597608	0.700411	0.712929	0.761543	0.694476	0.70169	0.816564	0.797207	0.730182	0.0110295	0.0036235	-0.0015265	0.002779
set6-var1_12	0.818639	-0.0003885	0.839036	0.051656	0.825238	0.0653005	0.388244	0.732014	0.010313	0.338469	0.0009935	0.0345945	0.828087	0.037954	0.0020695	0.006749	0.0307055	0.011232	0.015184	0.000871	0.467752	0.06377	0.651848	0.747861	0.812719	0.643254	0.734818	0.765783	0.731623	0.704941	0.789148	0.793354	0.551416	0.785169	0.619492	0.663207	0.609563	0.703828	0.774917	0.760045	0.75731	0.696892	0.830792	0.826032	0.720109	0.013874	0.007404	0.0020945	0.0030195
set6-var2_11	0.002288	0.021878	0.0017035	0.0589565	0.833843	0.834993	0.0020205	0.0045395	0.002081	0.00016	0.820618	0.0076665	0.0119215	0.530139	-0.0007305	0.007542	-3.5e-05	0.003128	-0.0031335	0.735181	0.0280145	0.740585	0.343001	0.0683705	0.0511895	0.007081	0.0679975	0.407382	0.338506	0.0616845	0.23243	0.147385	0.012371	0.111645	0.267425	0.049008	0.146802	0.0177995	0.008409	0.218872	0.020762	0.123068	0.10725	0.108382	0.07696	0.003275	0.729296	0.718554	-0.001047
set6-var2_12	0.011982	0.028523	0.0410295	0.83842	0.0198445	0.839427	0.0099145	0.0194575	0.697084	0.0107405	0.830754	0.668011	0.012156	0.70241	0.76815	0.0034885	0.00406	0.0063835	-0.0064165	0.68041	0.0236075	0.714476	0.145162	0.052309	0.0152955	0.003876	0.029685	0.190014	0.114378	0.0486535	0.0806285	0.0530435	0.002456	0.077822	0.150936	0.0881355	0.107339	0.042244	0.0193785	0.137989	0.0197055	0.0788305	0.0810945	0.0754485	0.0810695	0.753504	0.739637	0.700449	0.812374
set6-var4_11	0.64012	0.0088905	0.801899	0.043486	0.798225	0.0159375	0.839817	0.71933	0.0089015	0.823052	0.00759	0.0280295	0.721084	-0.002199	0.0015575	0.004851	0.641294	0.657531	0.625964	-0.00051	0.767213	0.0112605	0.678814	0.70177	0.759225	0.328506	0.703811	0.777108	0.681333	0.622806	0.719092	0.804046	0.248963	0.742347	0.643518	0.715612	0.660668	0.724066	0.658846	0.762671	0.580772	0.69098	0.792003	0.770863	0.72602	0.01283	0.028323	-0.0021435	0.000335
set7-var1_11	0.796234	-0.0138345	0.836133	0.826331	0.252	0.838117	0.838433	0.730763	0.714966	0.803018	0.834029	0.684671	0.459197	0.738264	0.749026	0.003447	0.604071	0.636528	0.539558	0.40459	0.76114	0.754182	0.613738	0.586399	0.585748	0.100798	0.569746	0.724594	0.592735	0.473812	0.609935	0.674876	0.053609	0.629904	0.520566	0.64459	0.639993	0.598396	0.384991	0.706842	0.315941	0.551839	0.682603	0.593551	0.55657	0.803708	0.795389	0.784975	0.796816
set7-var2_11	0.13784	0.0052375	0.493636	0.259723	0.839413	0.634235	0.426459	0.392489	0.399365	0.244796	0.130226	0.475332	-0.001077	0.02969	0.0587205	0.006529	0.010235	-0.006595	0.0051225	0.011001	0.229404	0.0511715	0.0206715	0.006713	0.00048	0.0037625	0.003276	0.0289195	0.0518985	-0.00065	0.0167265	0.005704	-0.000612	0.0008325	0.0167065	0.0076785	0.0144625	0.009029	0.000897	0.004585	0.0026375	0.015868	0.0073535	0.006714	0.0118535	0.598743	0.237495	0.082842	0.802231
set8_11	0.819034	-0.0026195	0.834267	0.839516	0.0473615	0.841499	0.832101	0.726687	0.713589	0.812653	0.834814	0.691701	0.828407	0.625817	0.7692	0.0046955	0.669938	0.63127	0.735961	0.679499	0.772909	0.739359	0.668921	0.749573	0.807989	0.679164	0.733562	0.768616	0.756324	0.704091	0.794275	0.807086	0.636258	0.786853	0.669456	0.688379	0.600981	0.738904	0.783523	0.783776	0.740366	0.683768	0.83828	0.816782	0.748151	0.784628	0.765629	0.752323	0.002371
set9-var1_11	-0.002371	0.000118	0.809984	0.0131405	0.24607	0.829947	0.810887	0.661724	0.00841	0.778889	0.797739	0.014949	0.786225	0.737235	0.005991	0.005094	0.519432	0.58763	0.505248	0.444756	0.763297	0.745564	0.595666	0.702832	0.73721	0.478886	0.691151	0.760128	0.707094	0.591009	0.71985	0.773481	0.148409	0.724049	0.537228	0.657877	0.607444	0.613977	0.656346	0.749192	0.612758	0.690041	0.775951	0.757126	0.712697	0.005233	0.005226	0.751263	0.002898
set9-var1_12	-0.000249	-0.000211	0.810759	0.0069145	0.0170625	0.825605	0.808114	0.68985	0.0022775	0.796405	0.806501	0.0004855	0.807451	0.68593	0.0020805	0.0091835	0.595202	0.642608	0.659972	0.608408	0.753036	0.72646	0.624842	0.707172	0.764692	0.591492	0.694205	0.719542	0.725237	0.650996	0.760939	0.784529	0.469005	0.739885	0.600939	0.669971	0.551578	0.678875	0.723221	0.731974	0.678789	0.671187	0.822064	0.783076	0.671771	0.003711	0.0037825	0.721351	0.0027215
setB-SA1178_11	0.751434	0.0297325	0.81465	0.814366	0.0071745	0.822082	0.82021	0.717773	0.697655	0.792947	0.814003	0.658865	0.803119	0.687338	0.69689	0.0021765	0.630459	0.634187	0.661271	0.596533	0.768772	0.722998	0.598043	0.735562	0.779127	0.587897	0.696222	0.698126	0.717967	0.669038	0.772478	0.776944	0.595972	0.753964	0.595931	0.664233	0.558753	0.680556	0.736556	0.705109	0.713703	0.679285	0.802395	0.791629	0.703255	0.770995	0.756878	0.754333	0.804796
setB-SA1179_11	0.74337	0.0056075	0.808104	0.823748	-0.0013445	0.818922	0.816564	0.696175	0.672523	0.760225	0.593988	0.655616	0.790501	0.688285	0.742933	0.0020465	0.551414	0.622344	0.674401	0.615013	0.764139	0.729061	0.601214	0.702276	0.764679	0.559854	0.691043	0.699554	0.697557	0.655995	0.753947	0.760398	0.535575	0.752866	0.588464	0.652068	0.548751	0.670081	0.694611	0.694725	0.678041	0.654354	0.782174	0.783173	0.69032	0.760712	0.741609	0.738191	0.807689
setB-SA1180_11	0.790094	0.0033005	0.824413	0.77967	0.821659	0.825596	0.83295	0.701832	0.712353	0.787458	0.829311	0.690321	0.799411	0.70804	0.571503	0.0030605	0.621145	0.637701	0.759266	0.749178	0.773262	0.734062	0.660259	0.711122	0.792751	0.572396	0.727724	0.716669	0.709246	0.658725	0.770507	0.787285	0.560238	0.776247	0.597808	0.650654	0.574291	0.69158	0.72871	0.732249	0.718225	0.664765	0.79978	0.799441	0.700115	0.77917	0.750908	0.763211	0.588174
setB-SAR1139_11	0.0021925	0.003822	-0.0001015	-0.003281	0.817002	0.005837	0.015024	0.003392	0.011167	0.0096925	0.002925	0.01139	0.010868	0.100471	0.0131585	0.0078325	0.0062115	0.017579	0.001251	0.0192915	0.0386895	0.0222485	0.173313	0.0204735	0.012577	0.0028485	0.0323995	0.147192	0.056571	0.029677	0.0553175	0.0217735	0.011012	0.023387	0.321934	0.05808	0.085518	0.0282605	0.0059365	0.0614975	0.0082375	0.0372975	0.031029	0.0291365	0.027878	0.0045885	0.008321	0.0067425	0.0026455
setB-SAR1140_11	0.006042	0.002379	0.0025945	0.002742	0.830263	0.0070115	0.000705	3.6e-05	0.0119885	0.000305	-0.0032005	0.006989	-0.001641	0.0066635	-0.0033865	0.0050985	-0.0027535	0.008544	-0.0024855	-0.003768	0.0070705	0.001237	0.015701	0.002958	0.003452	-0.0010895	0.007795	0.053377	0.0181465	0.0042575	0.0292745	0.008148	0.00093	0.0031445	0.083735	0.008697	0.030697	0.003734	0.0006765	0.0086565	0.0028595	0.01389	0.000212	0.001275	0.0070035	0.001267	0.00146	0.011353	0.001761
setC-MW0345_11	0.825022	0.0058075	0.83994	0.840593	-0.0012975	0.842361	0.848673	0.735843	0.708657	0.804758	0.847622	0.696302	0.840203	0.73473	0.790664	0.0049515	0.678998	0.668577	0.743696	0.655452	0.795293	0.781085	0.704735	0.756926	0.816681	0.586483	0.766891	0.760727	0.740615	0.691206	0.798828	0.819825	0.526139	0.805713	0.637795	0.702492	0.637748	0.741281	0.777292	0.777052	0.756309	0.695653	0.819349	0.81346	0.735537	0.798455	0.789388	0.779088	0.004456
splA_11	0.799276	-0.001381	0.803621	0.750485	-0.003161	0.833908	0.821184	0.711576	0.724296	0.809265	0.791919	0.680742	-9.8e-05	0.004494	0.629433	0.004247	0.564628	0.676115	0.74063	0.743793	-0.0024465	0.002085	0.673024	0.710607	0.740125	-0.0028635	-0.0010325	0.783805	0.0074405	0.641379	0.743121	-0.000732	0.32488	0.736881	0.0052825	0.684641	0.60036	0.681178	0.675046	0.74212	0.004101	0.690157	0.005728	0.793726	0.723125	0.800796	0.434468	0.489436	0.003748
splB_11	0.778574	0.0136275	0.803783	0.823978	0.0461005	0.833862	0.827112	0.713199	0.681283	0.826349	0.811383	0.660748	0.0065135	0.0380175	0.723951	0.013026	0.65323	0.687456	0.7613	0.76206	0.016346	0.0318825	0.644705	0.695332	0.79318	0.60611	0.718436	0.732562	0.716638	0.67841	0.756259	0.790054	0.576082	0.741451	0.62661	0.664919	0.573985	0.681679	0.743887	0.720874	0.729395	0.680443	0.832427	0.803917	0.673663	0.748298	0.041774	0.739764	0.0026845
tetK-12,3	-0.0001315	0.856882	0.0228415	0.003309	-0.000657	0.05419	0.006236	0.007132	0.009595	0.822386	0.0019125	0.0135815	0.031067	0.0258195	0.00165	0.010546	0.0038335	0.53229	0.662355	0.0015965	0.004088	0.04119	0.004775	0.0069345	0.0059245	0.006164	0.006404	0.0193545	0.676705	0.003094	0.738727	0.789349	0.414033	0.0095665	0.0086135	0.006649	0.0123755	0.0677685	0.003008	0.010408	0.016671	0.0709665	0.0440005	0.012551	0.0133795	0.008313	0.0101	0.0088725	0.8101
tetK-12,4	0.010021	0.858133	0.0053025	0.0070775	3.4e-05	0.002633	0.0014815	0.004044	-0.0010815	0.806427	-0.000659	0.005524	0.0031355	0.0004705	0.000349	0.006396	0.0041065	0.601029	0.653532	0.0059815	0.005762	0.002863	0.012527	0.004693	0.004206	-0.0019355	0.0022455	0.020819	0.663552	-0.001032	0.715917	0.769245	0.512837	0.002324	0.0337425	-0.000402	0.007926	0.030527	0.000337	-0.000842	0.004125	0.007068	0.0062995	0.003311	0.0124955	-0.007182	0.0005405	0.001065	0.79889
tetM-11,3	0.816226	0.0015555	-0.0022915	0.0044805	-0.0019595	-0.003115	-0.0008405	-0.0046215	0.0007675	-0.000645	-0.0045535	-0.0013085	-0.0057335	0.721823	0.002209	0.0227535	-0.002143	-0.002048	-0.0098435	0.006026	-0.00273	-0.000418	0.0020655	-0.002163	0.0002315	-0.0033905	0.0019455	0.002586	0.003715	0.000333	-0.0001205	-0.003917	-0.002518	0.738149	0.004593	0.657747	0.560315	0.664415	0.000149	0.727257	0.0013125	0.0151475	-0.0030345	0.794598	0.005558	-0.00329	-0.0026465	-0.002085	-0.000733
tst-1-16,2	0.780432	0.014352	0.81286	0.111578	-0.00013	0.014676	-0.003082	0.009706	0.137421	-0.001016	0.17553	0.0014495	0.005599	0.034096	0.0038185	0.0030375	0.0011015	0.000329	-0.000186	-0.0018215	0.0090245	0.740754	0.009824	0.0177655	0.003894	0.008544	0.0088615	0.0373785	0.0154815	0.0014615	0.0349265	0.013989	0.0006565	0.01602	0.0050265	0.0342185	0.0163245	0.046733	0.0014245	0.0181985	0.0057265	0.051762	0.010484	0.0401995	0.0296705	0.549114	0.000944	0.001409	0.0033525
vanB_11	0.0056095	0.009313	0.014379	0.0870425	0.000564	0.01938	0.0080055	-0.001991	-0.004779	0.003995	0.0040995	0.002521	0.006426	0.051105	0.0042485	0.0033665	-0.003902	-0.006798	-0.00686	0.0160495	-0.0084495	0.044859	0.0274245	0.0067505	0.050866	0.0019295	0.0522355	0.0172485	0.0211535	-0.0020565	0.008368	0.034595	-0.0004225	0.0031865	0.020754	0.0021975	0.0038885	-0.000775	0.0006115	0.0040225	0.008358	0.0292235	-0.001798	0.006284	0.014259	0.03646	0.0659985	0.051425	0.003021
[truncated: 60 more columns]
